# Supplementary material
Source: Elsevier journal article supplement (https://www.sciencedirect.com/science/article/pii/S0213911116301388)
Supplement: mmc2 [file S0213911116301388:mmc2.xlsx]

## Sheet: DATOS
Periodo	Sexo	CCAA	ID2	ID3	ID5	ID6	ID15	ID19	ID20	ID25	ID28	ID29	ID33	ID34	ID35	ID36	ID39	ID41	ID42	ID47.1	ID47.9	ID54	ID55	ID56	ID58	ID68	ID75	ID76	ID77	ID78	ID79	ID80	ID81	ID82	ID83	ID84	ID85	ID91	ID92	ID94	ID102	ID104	ID115	ID116	ID121	ID122	ID123	ID124	ID125
2014	Ambos sexos	Andalucía	72.43	34.92
2013	Ambos sexos	Andalucía	72.17	36.33	18	53.1	37.7	17.4	23.8	259.44			13	55.5	23.9	25.2	26.1		38.3																			23.3	32.7	9.9	59.5		3585	6632	13277	9996	13689	11.7
2012	Ambos sexos	Andalucía	72.14	34.45	16.6	50.8	37.8	14.9	20.1	293.7			13.9	51.4	24.5	20.6	21.8	26	36.9	12.6	5.9	1171.28	14.76	58.52		6.58					0.73	0.6				0.7	7423277	22.8	32.4	10.1	60.4		9190	13381	13987	9769	13737	11.7
2011	Ambos sexos	Andalucía	71.28	30.28	16.1	43.2	38.1	11.9	15.9	280	11200	18300	12.3	49.6	20.5	20.1	18.1	27.7	38.4	17.6	6.4	1184.14	15.92	54.44	21.37	6.52	1.55	2.75	90.81	91.37	0.71	0.59	131.26	58.0438	334.492	0.73	7828957	21.6	32.2	10	61	70.7	8798	17584	13085	9089	9864	10.9	0.986617
2010	Ambos sexos	Andalucía	71	27.9	15.6	40.8	38.2	9.7	12.5	309.53	11200	18300	11.7	52.2	22.1	14.6	23.3	25.4	35	14.5	7.1	1264.76	15.96	51.77	23.44	6.35	1.56	2.91	91.43	89.46	0.73	0.57	131.257	55.5327	326.405	0.74	7981984	21.5	35.3	10.3	61.8	72.8	8603	36619	13935	9995	6886	9.6
2009	Ambos sexos	Andalucía	70.28	25.33	15.4	36.2	38.6	6.3	7.4	323.2	11700	18500	9	45.7	17.3	11.4	20.4	24.8	33.3	15.3	6.9	1310.47	16.24	53.68	21.38	6.29	1.43	2.63	92.23	91.62	0.72	0.55	131.593	53.5566	318.735	0.72	7810918	21.1	34	9.7	62.4	72.8	9670	60178	14863	10587	4279	7.5
2008	Ambos sexos	Andalucía	69.31	17.79	15.1	25.3	39	3.5	3.6	333.31	11600	19900	6.8	38.2	17	10.1	17.2	23.9	33.4	15.7	6.8	1330.6	17.07	54.95	20.08	6.3	1.43	2.61	90.91	91.46	0.73	0.53	130.682	52.9	313.646	0.67	7444942	17.4	34.5	9.7	63.4	72.8	9305	109837	12218	7358	3491	5.9
2007	Ambos sexos	Andalucía	67.89	12.81	16.2	18.3	39.2	2.8	2.7	280.38	10900	20200	8.6	42.8	20.8	11.5	14.7	22.1	33.1	15.3	7.5	1167.27	17.2	52.24	21.83	6.32	1.4	2.6	91.91	91.43	0.75	0.55	129.658	51.1541	326.156	0.62	6696638	14.8	34.4	9.9	63.8	74.8	9070	119380	6642	2941		7.7
2006	Ambos sexos	Andalucía	66.9	12.66	17.6	18.2	39.1	3	3.5	287.47	10500	19200	7.3	43	24	10	18	23.6	35.4	15.2	6.7	1113.45	16.14	53.81	22.13	6.07	1.37	2.57	91.71	92.02	0.73	0.57	129.841	49.1614	333.093	0.61	6195634	14.4	31.8	9.8	64.3	74.8	9386	123799	6177	2323		6.4
2005	Ambos sexos	Andalucía				19.7	39.2	3.5	3.7		10000	17800	6.3	39.7	18.4	10.7	13.6	21.8	31.6	13.5	6.5	1026.96	16.36	51.29	23.58	6.14	1.34	2.52	92.18	92.8	0.74	0.56	128.048	47.0239	334.961	0.6	5555618	15.9	31.4	9.7		74.8	11279	99520	6296	2033		5.8
2004	Ambos sexos	Andalucía				24	39.5	5.4	7		9400	16900	11.5	53.8	28.8	13.3	17.7	23.6	37.6	15.6	5.7	979.7	16.01	50.76	24.64		1.34	2.51	92.56	93.08	0.76	0.56	126.871	45.22	308.303	0.59	5124648	16.5	30.5	4.5		74.8	11426	104746	6047	2022		10.4
2003	Ambos sexos	Andalucía				24.9	39.1	5.9	7.6		8900	16000										909.37	15.61	50.41	26.02		1.3	2.46	92.68	93.24			124.794	45.0632	289.226	0.6	4786750	16.8	28.6	4.5		68.8	9806	117767	5820	1972
2002	Ambos sexos	Andalucía				25.2	39.6	6.6	7.8		8500	15400										842.98	15.74	50.63	25.4		1.3	2.45	91.88	92.98			121.055	43.3131	282.629	0.59	4442114	16.7	27.5	4.2		68.8	8749	114530	5550	2000
2001	Ambos sexos	Andalucía				26.5	40.2	6.3	8.5		8100	14300															1.3	2.43	91.88	92.87			117.389	42.062	299.603	0.59	4141507	16.9	24.5	4.5		68.8	14035	102746	4502	1200			0.592189
2000	Ambos sexos	Andalucía				32.5	40.3	9.4	11.9		7600	13600															1.3	2.45	92.14	93.27			111.858	39.903	287.832	0.6	3894892	17.3	23.1	4.7		68.8	14782	75122	4694
1999	Ambos sexos	Andalucía				36.5	40.5	11.3	15.2																		1.3	2.39	93.67	93.66			106.891	37.7995	259.377	0.61	3622477					78	16485	48571	4537
1990	Ambos sexos	Andalucía
1991	Ambos sexos	Andalucía																																									9726	45099
1992	Ambos sexos	Andalucía																																		0.72	2638300						8195	36624
1993	Ambos sexos	Andalucía																																		0.7	2655465						9994	28421
1994	Ambos sexos	Andalucía																																		0.68	2776033					76.2	17984	32355
1995	Ambos sexos	Andalucía																																		0.65	2993432					76.2	17394	23753	4759
1996	Ambos sexos	Andalucía																									1.26	2.46	93.65	95.18						0.65	3168242					78	18284	29515	4905
1997	Ambos sexos	Andalucía																									1.26	2.34	92.86	94.21			99.2522	34.5268	226.637	0.63	3237847					78	15779	31065	4980
1998	Ambos sexos	Andalucía																									1.27	2.33	92.48	93.83			102.484	35.3993	235.527	0.62	3446428					78	17058	32666	4706
1989	Ambos sexos	Andalucía
1988	Ambos sexos	Andalucía
1987	Ambos sexos	Andalucía
1986	Ambos sexos	Andalucía
1985	Ambos sexos	Andalucía
1984	Ambos sexos	Andalucía
1983	Ambos sexos	Andalucía
1982	Ambos sexos	Andalucía
1981	Ambos sexos	Andalucía
1980	Ambos sexos	Andalucía
1979	Ambos sexos	Andalucía
1978	Ambos sexos	Andalucía
1977	Ambos sexos	Andalucía
1976	Ambos sexos	Andalucía
1975	Ambos sexos	Andalucía
2014	Hombres	Andalucía	78.98	32.84
2013	Hombres	Andalucía	78.56	34.87	14.5	53.6			23.7																													23.6	29.8	9.3	59.6
2012	Hombres	Andalucía	78.82	33.5	13.7	52.6			21.1																	6.59												24.3	29	9.8	60.4
2011	Hombres	Andalucía	79.31	28.83	13.7	44.2			15.9																	6.55												22.6	28.7	9.3	61.3								1.1787
2010	Hombres	Andalucía	79.54	26.79	12.2	42.8			13.4																	6.38												22.3	29.1	9.6	62
2009	Hombres	Andalucía	79.83	24.12	11.6	37.3			7.1																	6.41												23.4	28	9.1	62.5
2008	Hombres	Andalucía	80.17	15.33	11.6	24.1			2.8																	6.31												17	29.9	8.7	63
2007	Hombres	Andalucía	79.63	9.6	12.8	14.9			1.7																	6.3												12.5	30.5	8.9	63.4
2006	Hombres	Andalucía	79.58	9.31	14.9	14.3			2																	6.08												12	28.3	8.9	64.2
2005	Hombres	Andalucía				16			2.6																	6.17												13.1	27.7	9.1
2004	Hombres	Andalucía				18.3			4.6																													13.7	27.2	4
2003	Hombres	Andalucía				20.3			5.2																													14	26.6	4.2
2002	Hombres	Andalucía				18.8			5																													13.5	26.2	4
2001	Hombres	Andalucía				21.5			5.7																													13.9	23.4	4.3									0.660694
2000	Hombres	Andalucía				25.2			8																													15	23.7	4.3
1999	Hombres	Andalucía				29.3			10.3
1991	Hombres	Andalucía
1992	Hombres	Andalucía
1993	Hombres	Andalucía
1994	Hombres	Andalucía
1995	Hombres	Andalucía
1996	Hombres	Andalucía
1997	Hombres	Andalucía
1998	Hombres	Andalucía
2014	Mujeres	Andalucía	65.81	37.44
2013	Mujeres	Andalucía	65.7	38.1	21.9	52.6			23.9																													23	35.7	10.5	59.5
2012	Mujeres	Andalucía	65.34	35.61	20	48.7			19.1																	6.56												21.2	36	10.3	60.3
2011	Mujeres	Andalucía	63.1	32.13	18.9	42.2			15.9																	6.49												20.6	36	10.7	60.8								0.800867
2010	Mujeres	Andalucía	62.3	29.35	19.7	38.5			11.6																	6.32												20.8	41.8	11	61.6
2009	Mujeres	Andalucía	60.54	26.97	20	34.8			7.7																	6.18												18.6	40.2	10.3	62.4
2008	Mujeres	Andalucía	58.23	21.26	18.7	26.7			4.7																	6.28												17.8	39.2	10.7	63.7
2007	Mujeres	Andalucía	55.93	17.46	19	22.5			4																	6.34												17.3	38.6	11	64.2
2006	Mujeres	Andalucía	53.97	17.69	19.7	23.2			5.5																	6.06												16.9	35.5	10.6	64.5
2005	Mujeres	Andalucía				24.6			5.2																	6.11												18.8	35.3	10.3
2004	Mujeres	Andalucía				31.4			10																													19.4	33.8	4.9
2003	Mujeres	Andalucía				31.2			10.8																													19.8	30.7	4.7
2002	Mujeres	Andalucía				33.5			11.5																													20.2	28.9	4.4
2001	Mujeres	Andalucía				33.2			12.2																													19.9	25.7	4.7									0.526918
2000	Mujeres	Andalucía				41.5			16.7																													19.6	22.5	5
1999	Mujeres	Andalucía				46			21.6
1991	Mujeres	Andalucía
1992	Mujeres	Andalucía
1993	Mujeres	Andalucía
1994	Mujeres	Andalucía
1995	Mujeres	Andalucía
1996	Mujeres	Andalucía
1997	Mujeres	Andalucía
1998	Mujeres	Andalucía
2014	Ambos sexos	Aragón	76.77	20.26
2013	Ambos sexos	Aragón	76.48	21.49	24.8	38.7	38.2	9.8	14.8	418.47			10.2	30.3	12.1	10.2	15.7		19.8																			13.8	43.2	12.3	51.5		964	1195	1038	619	1372	9
2012	Ambos sexos	Aragón	77.38	18.79	25.6	33.7	38.2	7.8	11	416.69			4	26.4	7.7	11.8	5.3	18.2	18.4	8.9	11.8	1589.84	12.32	61.11		7.26					0.9	0.72				0.1	1049990	14.1	46.1	12.3	51.9		3541	3307	1226	806	1856	3.2
2011	Ambos sexos	Aragón	75.93	17.19	21.1	30.6	38.4	6.7	9.8	306.39	15600	27000	4.7	22.1	6.4	7.5	4.7	15.1	18.6	7.9	13.8	1609.5	15.11	56.71	18.1	6.99	2.18	4.1	95.89	94.97	0.88	0.71	126.931	51.1829	539.968	0.11	1143870	15.8	46.4	12.6	51.8	72.6	981	2956	1259	792	1639	3.3	1.41195
2010	Ambos sexos	Aragón	75.34	15.05	23.8	25.7	38.8	5.2	8.1	285.61	15600	26900	5.5	19.8	9.8	5.6	5	15.1	17.5	6	12.7	1562.37	15.89	53.12	20.79	6.71	2.14	3.86	95.27	94.8	0.88	0.71	125.955	48.175	565.694	0.11	1189231	12.5	46.3	11.8	52.5	75.9	1796	8139	1306	830	1456	5.7
2009	Ambos sexos	Aragón	76.02	13.11	19.9	23.8	38.9	2.2	3	342.97	16100	26600	3.2	15.4	6.7	2.6	4.2	10.9	12.6	5.5	9.9	1610.84	15.36	54.87	20.6	6.8	2.2	3.99	92.36	93.61	0.86	0.7	125.63	45.6838	540.592	0.11	1226763	13.1	42.3	10.7	53	75.9	3430	10726	1474	928	873	3.5
2008	Ambos sexos	Aragón	76.41	7.35	21	14.3	39.5	1	1	376.25	16200	28800	2.7	15.5	4	4.9	3.1	12	18	7.6	14.3	1512.09	15.16	54.32	21.15	6.68	2.18	3.85	92.1	93.48	0.84	0.69	123.999	44.7284	485.043	0.11	1181842	11	41.9	11.1	54.6	75.9	4956	14189	953	491	877	3.3
2007	Ambos sexos	Aragón	76.12	5.32	23.6	9.1	39.3	0.9		384.49	15200	28800	5.4	12.4	4.7	4	5.6	14.8	19	9.8	15.3	1420.1	14.12	55.13	21.93	6.87	2.1	3.7	93.28	93.36	0.85	0.7	127.065	44.1425	383.371	0.1	1084324	9.9	43.7	11.6	55.3	77	833	12863	579	207		4.8
2006	Ambos sexos	Aragón	73.47	5.56	29.2	9.6	39.4	0.9	0.9	278.58	14600	26700	3.6	18.7	5.5	4.9	7.2	11.5	15.6	7.1	12.9	1320.55	12.73	54.33	22.56	6.72	2.07	3.61	93.47	93.48	0.83	0.67	126.797	42.7655	386.626	0.1	986295	9	43.6	12.3	56.3	77	1101	12865	524	191		3.5
2005	Ambos sexos	Aragón				10.3	39.7	1	1.2		13600	24600	2.1	23.5	7.2	4.9	5.3	13.8	20.3	8.5	12.8	1209.21	13.8	54.28	23.3	6.41	2	3.32	93.73	93.4	0.83	0.68	126.443	42.5207	431.601	0.1	903537	8.8	43.1	11.7		77	1889	12675	524	163		1.7
2004	Ambos sexos	Aragón				10.7	39.8	1.2			12900	23400	3.8	23.9	7.1	3.9	4.1	8.9	13.8	5.8	10	1168.02	14.17	53.76	22.97		1.97	3.33	93.64	94.26	0.85	0.68	127.894	41.3372	490.788	0.1	841283	8	39.3	4.2		77	1255	11024	476	124		3.3
2003	Ambos sexos	Aragón				11.2	40	2.2	2.2		12300	22300										1068.9	14.62	53.46	23.23		1.96	3.29	93.21	94.14			125.807	42.4538	458.075	0.1	787154	8.3	38.9	4.2		71.4	124	15395	435	166
2002	Ambos sexos	Aragón				11.2	40.4	1.7	3.1		11800	21800										954.57	14.87	52.02	24.8		1.87	3.22	92.91	94.09			124.474	42.4831	415.987	0.1	746057	10.8	36.8	3.6		71.4	401	14755	423	159
2001	Ambos sexos	Aragón				9	40.5	1.8	2.9		11100	20200															1.81	3.17	92.91	94.2			121.9	42.2152	419.071	0.1	687113	8.2	38.9	3.4		71.4	789	13479	380	97			0.860036
2000	Ambos sexos	Aragón				12.7	40.7	2.4	2.3		10500	19300															1.79	3.16	92.94	94.19			118.279	41.0133	473.365	0.1	653928	8.7	35.9	4		71.4	511	14787	296
1999	Ambos sexos	Aragón				14.8	40.6	4.1	4.3																		1.73	3.07	93.37	94.19			113.902	40.1418	482.287	0.1	578381					77.5	35	11960	269
1990	Ambos sexos	Aragón
1991	Ambos sexos	Aragón																																									1583	4873
1992	Ambos sexos	Aragón																																									1358	4104
1993	Ambos sexos	Aragón																																									2413	4328
1994	Ambos sexos	Aragón																																								78.2	2027	6926
1995	Ambos sexos	Aragón																																								78.2	2394	12237	317
1996	Ambos sexos	Aragón																									1.65	2.88	93.27	95.47												77.5	2451	8894	343
1997	Ambos sexos	Aragón																									1.66	2.89	97.18	96.91			107.209	38.5518	381.922							77.5	2154	11718	288
1998	Ambos sexos	Aragón																									1.69	2.95	93.33	94.7			110.401	40.1457	443.275							77.5	1312	8327	269
1989	Ambos sexos	Aragón
1988	Ambos sexos	Aragón
1987	Ambos sexos	Aragón
1986	Ambos sexos	Aragón
1985	Ambos sexos	Aragón
1984	Ambos sexos	Aragón
1983	Ambos sexos	Aragón
1982	Ambos sexos	Aragón
1981	Ambos sexos	Aragón
1980	Ambos sexos	Aragón
1979	Ambos sexos	Aragón
1978	Ambos sexos	Aragón
1977	Ambos sexos	Aragón
1976	Ambos sexos	Aragón
1975	Ambos sexos	Aragón
2014	Hombres	Aragón	82	18.37
2013	Hombres	Aragón	81.85	20.45	17.9	40.6			15.7																													12.2	38.6	10.6	51.1
2012	Hombres	Aragón	83.33	17.87	23.6	34.8			13																	7.24												13.9	41.6	11	50.7
2011	Hombres	Aragón	82.56	16.99	18.2	33.3			8.8																	6.94												17.1	47.7	12	50								1.66102
2010	Hombres	Aragón	82.35	14.29	21.6	26			7.9																	6.6												11	43	10.2	50.3
2009	Hombres	Aragón	83.45	13.48	15.9	27.5			3.4																	6.83												13.8	38.9	8.8	52.1
2008	Hombres	Aragón	84.65	6.68	18.3	14.1																				6.56												9.6	40.3	9.7	53.3
2007	Hombres	Aragón	84.69	3.93	18.2	7.5																				6.88												7.2	39.1	9.8	53.7
2006	Hombres	Aragón	83.55	3.9	21.1	7.7																				6.68												7.4	37.7	10.2	55
2005	Hombres	Aragón				7.5																				6.3												8	34.5	10.8
2004	Hombres	Aragón				7.9																																6.5	31.9	3.8
2003	Hombres	Aragón				9.1																																7.9	34.7	3.9
2002	Hombres	Aragón				7.5																																8.2	33	3.1
2001	Hombres	Aragón				7.4			2.6																													6.1	36.2	3									1.02867
2000	Hombres	Aragón				8																																6.8	33.1	3.5
1999	Hombres	Aragón				8.9
1991	Hombres	Aragón
1992	Hombres	Aragón
1993	Hombres	Aragón
1994	Hombres	Aragón
1995	Hombres	Aragón
1996	Hombres	Aragón
1997	Hombres	Aragón
1998	Hombres	Aragón
2014	Mujeres	Aragón	71.35	22.52
2013	Mujeres	Aragón	70.89	22.75	32.2	36.6			13.8																													15.5	48.2	14	51.8
2012	Mujeres	Aragón	71.15	19.92	27.9	32.5			9																	7.28												14.2	50.9	13.6	53.1
2011	Mujeres	Aragón	68.93	17.44	24.6	27.6			10.8																	7.03												14.5	44.9	13.3	53.6								1.16555
2010	Mujeres	Aragón	67.92	16.02	26.3	25.4			8.3																	6.8												14.2	49.9	13.5	54.5
2009	Mujeres	Aragón	68.08	12.63	25.4	19.2			2.6																	6.77												12.4	46.1	12.8	53.8
2008	Mujeres	Aragón	67.6	8.23	23.9	14.5			1.6																	6.81												12.6	43.8	12.6	55.7
2007	Mujeres	Aragón	67	7.2	27.5	11.1																				6.86												12.8	48.9	13.7	56.7
2006	Mujeres	Aragón	62.8	7.91	34.8	11.9																				6.75												10.7	50.3	14.4	57.6
2005	Mujeres	Aragón				13.8			1.7																	6.52												9.8	52.6	12.7
2004	Mujeres	Aragón				14.1																																9.5	47.4	4.5
2003	Mujeres	Aragón				13.9			3.3																													8.7	43.6	4.6
2002	Mujeres	Aragón				16.1			5.4																													13.7	40.9	4.1
2001	Mujeres	Aragón				11.1																																10.3	41.8	3.8									0.69628
2000	Mujeres	Aragón				18.9			4.6																													10.7	38.8	4.5
1999	Mujeres	Aragón				22.5			7
1991	Mujeres	Aragón
1992	Mujeres	Aragón
1993	Mujeres	Aragón
1994	Mujeres	Aragón
1995	Mujeres	Aragón
1996	Mujeres	Aragón
1997	Mujeres	Aragón
1998	Mujeres	Aragón
2014	Ambos sexos	Asturias, Principado de	69.87	21.25
2013	Ambos sexos	Asturias, Principado de	69.95	24.35	29.4	43.8	38.9	13.1	19.7	395.07			6.3	26.9	12	16.5	8.9		21.8																			16	50.2	9.6	51.7		400	1475	1337	569	1445	4.6
2012	Ambos sexos	Asturias, Principado de	69.46	21.98	31.3	41.8	38.4	9.6	15.5	306.46			5.1	26.5	9.5	22.6	7	13.9	24.5	8.3	13	1590.3	11.75	58.73		7.09					0.76	0.66				0.07	782804	15.6	51.2	9.3	53		1201	2897	1433	576	2059	5
2011	Ambos sexos	Asturias, Principado de	68.57	17.94	31.6	34	39.4	7.3	12	294.25	14800	22700	2.2	17.8	5.3	12.8	3.3	8	20.4	4.7	10	1641.19	12.22	55.98	19.17	7.29	2.21	3.55	93.56	95.84	0.75	0.67	125.126	64.3182	452.219	0.08	837698	15.6	49.2	9.7	54.3	70.3	2620	4313	1403	517	1872	2.2	0.961544
2010	Ambos sexos	Asturias, Principado de	68.27	15.98	26.7	28.9	39.9	6	8.3	324.09	14600	22600	2.7	19.6	6.9	8.8	5.8	10.4	16.5	5.3	9.5	1589.74	12.28	54.65	21	7.55	2.17	3.41	92.93	94.37	0.74	0.69	124.239	60.5581	381.611	0.08	883070	15.9	42.9	8.9	55.1	71.3	1943	6814	1394	566	1549	2.2
2009	Ambos sexos	Asturias, Principado de	68.11	13.5	28.9	25.6	40.3	4	5.5	318.85	14900	22400	3.7	21.6	6	8.7	8.1	9.7	18.8	6.2	10.7	1661.83	11.64	56.83	20.37	7.21	2.1	3.44	92.36	94.31	0.74	0.72	121.68	59.2337	371.557	0.09	925076	15.2	44.4	8.9	55.8	71.3	1161	6464	1583	639	1007	4
2008	Ambos sexos	Asturias, Principado de	68.64	8.57	28	15.5	40.7	2.3	2.2	421.43	15300	24200	1.6	20	7.6	9.1	4.5	7.1	19.3	4.8	13.5	1481.27	13.35	52.68	22.24	7.08	2.08	3.35	92.93	94.22	0.73	0.66	123.415	56.7501	343.05	0.09	953572	8.3	40.8	9.9	56.6	71.3	1610	10129	1353	492	541	1.3
2007	Ambos sexos	Asturias, Principado de	66	8.46	28.9	15.1	40.7	2.6	3.6	326.18	14700	24000	2.7	21.5	5.4	12.3	7.2	9.6	18.6	5	9.3	1366.72	13.47	51.91	22.94	7.43	2.05	3.13	92.67	94.24	0.73	0.65	122.048	54.4116	371.529	0.09	922241	10.6	39.1	8.6	58.3	71.7	1465	9795	1148	344		2.8
2006	Ambos sexos	Asturias, Principado de	65.39	9.21	35.6	16.8	40.6	2.9	3.8	376.83	13700	22300	2.7	20.2	8.9	10.3	3.2	9.6	19.8	4.8	9.3	1283.98	12.3	52.93	22.86	7.35	1.95	3.08	92.16	94.53	0.71	0.65	120.961	52.3533	343.321	0.08	844918	11.7	37.3	8.1	59.6	71.7	945	12764	1057	247		2.4
2005	Ambos sexos	Asturias, Principado de				17.6	40.6	4	5		12600	20200	1.5	21.2	8.7	11.5	4.4	13.4	22.8	8.3	10.1	1204.54	12.1	52.59	23.31	7.26	1.91	2.99	91.84	94.5	0.7	0.63	119.577	51.0989	336.913	0.08	780106	9.9	40.2	8.9		71.7	1060	11957	1130	308		1.6
2004	Ambos sexos	Asturias, Principado de				22.4	42	4.7	9.1		11600	18800	4.1	28.1	11.7	10.2	6.8	9.3	19.7	6.3	8	1136.45	12.39	51.55	23.97		1.87	2.97	91.78	94.76	0.7	0.63	119.385	49.6414	314.553	0.09	748884	13.6	38.7	3.7		71.7	1209	11385	1193	261		4.2
2003	Ambos sexos	Asturias, Principado de				22.1	42.3	4.7	7.7		10900	17800										1061.39	12.44	53.59	24.59		1.75	2.76	91.33	94.59			118.666	53.5788	339.584	0.09	726129	14.3	37.3	4.5		67	1151	8793	987	278
2002	Ambos sexos	Asturias, Principado de				19.5	42.5	4.8	7.7		10400	17400										946.3	12.74	52.85	24.59		1.71	2.67	83.74	91.4			115.922	52.5889	323.545	0.09	648836	10.8	33.7	3.5		67	795	8920	909	226
2001	Ambos sexos	Asturias, Principado de				13.7	43.3	3.4	3.7		9700	16300															1.61	2.62	83.74	89.76			114.346	50.0674	326.285	0.09	612567	10	27.3	3.4		67	1202	6946	793	144			0.644676
2000	Ambos sexos	Asturias, Principado de				29.7	43.6	10.2	16.7		9100	15400															1.63	2.64	84.92	90.22			107.508	48.3457	282.173	0.09	576756	12.3	29.3	3.6		67	626	5274	928
1999	Ambos sexos	Asturias, Principado de				35.6	43.7	10	17.8																		1.59	2.58	88.69	91.91			106.373	47.4126	256.591							75.9	780	4912	908
1990	Ambos sexos	Asturias, Principado de
1991	Ambos sexos	Asturias, Principado de																																									2347	4283
1992	Ambos sexos	Asturias, Principado de																																									1624	4341
1993	Ambos sexos	Asturias, Principado de																																									1723	3339
1994	Ambos sexos	Asturias, Principado de																																								75.4	1327	4851
1995	Ambos sexos	Asturias, Principado de																																								75.4	2790	2684	979
1996	Ambos sexos	Asturias, Principado de																									1.59	2.5	88	92.62												75.9	1894	4057	948
1997	Ambos sexos	Asturias, Principado de																									1.58	2.5	86.88	92.63			100.385	45.4435	229.732							75.9	1830	3786	1076
1998	Ambos sexos	Asturias, Principado de																									1.58	2.54	87.97	92.35			102.766	46.1934	233.772							75.9	1234	4128	1039
1989	Ambos sexos	Asturias, Principado de
1988	Ambos sexos	Asturias, Principado de
1987	Ambos sexos	Asturias, Principado de
1986	Ambos sexos	Asturias, Principado de
1985	Ambos sexos	Asturias, Principado de
1984	Ambos sexos	Asturias, Principado de
1983	Ambos sexos	Asturias, Principado de
1982	Ambos sexos	Asturias, Principado de
1981	Ambos sexos	Asturias, Principado de
1980	Ambos sexos	Asturias, Principado de
1979	Ambos sexos	Asturias, Principado de
1978	Ambos sexos	Asturias, Principado de
1977	Ambos sexos	Asturias, Principado de
1976	Ambos sexos	Asturias, Principado de
1975	Ambos sexos	Asturias, Principado de
2014	Hombres	Asturias, Principado de	73.32	20.31
2013	Hombres	Asturias, Principado de	74.59	24.14	24	47.7			23.5																													15.4	46.4	8.3	49.7
2012	Hombres	Asturias, Principado de	74.84	22.04	22.5	42.6			19.4																	7.12												17	47.8	8.7	51.6
2011	Hombres	Asturias, Principado de	73.8	18.41	24.3	36.2			15.5																	7.21												18.3	47.8	8.9	52.6								1.01619
2010	Hombres	Asturias, Principado de	74.14	15.25	20.3	31.1			10.8																	7.43												16.6	33.8	8.7	53.6
2009	Hombres	Asturias, Principado de	74.3	12.73	22.7	28.5			6																	7.08												16	37	8.1	53.4
2008	Hombres	Asturias, Principado de	75.84	6.84	19.6	14.7			1.9																	7												8.2	35.5	8.9	55.1
2007	Hombres	Asturias, Principado de	74.33	6.53	22.4	12.3			3																	7.41												10.6	35.6	7.6	56.6
2006	Hombres	Asturias, Principado de	75.09	6.84	26.6	13.6			3.4																	7.45												13.8	29.2	7	57.6
2005	Hombres	Asturias, Principado de				15.5			3.7																	7.13												9.8	34.1	8.8
2004	Hombres	Asturias, Principado de				20.6			7.8																													11.3	30.3	3.8
2003	Hombres	Asturias, Principado de				17.1			6.3																													11.6	35.1	4.7
2002	Hombres	Asturias, Principado de				16			6.5																													9	33.8	3.4
2001	Hombres	Asturias, Principado de				9.3																																7.2	25.3	3.3									0.630059
2000	Hombres	Asturias, Principado de				23			9.8																													9.5	26.2	3.4
1999	Hombres	Asturias, Principado de				26.9			11.6
1991	Hombres	Asturias, Principado de
1992	Hombres	Asturias, Principado de
1993	Hombres	Asturias, Principado de
1994	Hombres	Asturias, Principado de
1995	Hombres	Asturias, Principado de
1996	Hombres	Asturias, Principado de
1997	Hombres	Asturias, Principado de
1998	Hombres	Asturias, Principado de
2014	Mujeres	Asturias, Principado de	66.48	22.27
2013	Mujeres	Asturias, Principado de	65.38	24.58	35.3	39.3			15.4																													16.6	54.1	10.8	53.5
2012	Mujeres	Asturias, Principado de	64.15	21.9	41.6	41			10.8																	7.07												14.2	54.6	9.8	54.3
2011	Mujeres	Asturias, Principado de	63.4	17.39	40.5	31.5			8.1																	7.36												12.9	50.6	10.5	56								0.911799
2010	Mujeres	Asturias, Principado de	62.45	16.84	33.4	26.4			5.5																	7.67												15.1	52.4	9.2	56.6
2009	Mujeres	Asturias, Principado de	61.97	14.4	35.4	22.5			5																	7.33												14.4	52.1	9.8	57.8
2008	Mujeres	Asturias, Principado de	61.52	10.69	34.6	16.3			2.5																	7.15												8.3	46.3	10.9	57.9
2007	Mujeres	Asturias, Principado de	57.79	10.91	33.8	18.3			4.2																	7.45												10.6	42.7	9.5	59.8
2006	Mujeres	Asturias, Principado de	55.83	12.35	42.2	20.9			4.3																	7.27												9.6	45.6	9.1	61.3
2005	Mujeres	Asturias, Principado de				20.2			6.5																	7.38												10	46.3	8.9
2004	Mujeres	Asturias, Principado de				24.6			10.5																													16	47.2	3.6
2003	Mujeres	Asturias, Principado de				28			9.3																													17.1	39.5	4.3
2002	Mujeres	Asturias, Principado de				24.1			9.3																													12.5	33.6	3.6
2001	Mujeres	Asturias, Principado de				20.4			7.4																													13	29.4	3.4									0.657904
2000	Mujeres	Asturias, Principado de				37.7			25																													15.1	32.4	3.9
1999	Mujeres	Asturias, Principado de				46.4			25.6
1991	Mujeres	Asturias, Principado de
1992	Mujeres	Asturias, Principado de
1993	Mujeres	Asturias, Principado de
1994	Mujeres	Asturias, Principado de
1995	Mujeres	Asturias, Principado de
1996	Mujeres	Asturias, Principado de
1997	Mujeres	Asturias, Principado de
1998	Mujeres	Asturias, Principado de
2014	Ambos sexos	Baleares, Islas	78.49	20.05
2013	Ambos sexos	Baleares, Islas	79.61	22.34	15.9	34.1	38.2	9.3	10.2	286.96			18.8	43	23.7	7.1	19.3		27.8																			19.3	33.8	10	53.4		168	1226	1303	691	3090	17.2
2012	Ambos sexos	Baleares, Islas	79.91	23.3	16	39.2	37.7	9.2	13.2	264.06			17.5	35.9	21.1	10.4	8.9	21.4	25.1	12.4	15.3	1249.88	12.65	58.91		6.38					0.64	0.52				0.07	753860	21.2	33.9	10.4	53.6		69	2559	1699	980	3430	14.2
2011	Ambos sexos	Baleares, Islas	77.99	22.02	14.9	34.2	38.1	7.1	10.2	338.32	13900	25300	16.8	36.7	23.8	13.1	16	18.3	26.7	11.7	11.8	1180.54	14.27	57.33	14.65	6.71	1.83	3.48	88.32	81.81	0.64	0.52	109.31	55.6172	287.065	0.08	865285	19.8	32.7	10.5	55.2	62.2	288	3364	1495	749	3656	16.9	2.55265
2010	Ambos sexos	Baleares, Islas	78.79	20.21	12.3	31.9	38.3	5.9	7.2	274.63	14000	25300	12	36.1	20.1	11.2	14.8	18.1	26	11.7	10.5	1463.95	13.2	57.91	13.89	6.45	1.85	3.57	88.06	82.54	0.65	0.53	108.138	53.9766	273.758	0.08	897298	21.6	26.5	10.2	57.3	67.6	391	5171	1831	960	2941	9.8
2009	Ambos sexos	Baleares, Islas	77.99	18.02	11.3	24	38.6	3.2	3.5	293.6	14600	25600	16.2	37.8	21.5	5	16.4	18.4	24.3	8	9.4	1301.1	14.35	59.67	16.48	6.6	1.82	3.49	87.96	80.66	0.64	0.53	108.507	53.2301	300.862	0.08	909306	20.9	27.5	9.4	58.3	67.6	339	9071	2310	1196	4180	14.8
2008	Ambos sexos	Baleares, Islas	76.91	10.19	13.3	17.2	39.4	1	1	319.14	14900	27800	7	30.4	13.6	5	14.1	14.3	20.4	8.4	9.6	1265.26	13.9	60.54	16.36	6.48	1.86	3.72	84.55	78.77	0.64	0.53	106.474	51.5348	318.381	0.08	845435	20.3	28.9	8.9	59.1	67.6	239	11827	1655	686	2893	6.1
2007	Ambos sexos	Baleares, Islas	76.05	7.19	12.4	10.1	39.7	0.6		333.04	14600	28200	9.3	25.4	13.1	4.4	7.4	18.6	21.1	8	8.4	1216.35	13	59.84	17.97	6.66	1.89	3.73	83.17	79.59	0.59	0.48	109.352	50.1114	359.326	0.07	760237	15.6	27.5	9.6	60.8	68.8	385	12162	1220	290		8.1
2006	Ambos sexos	Baleares, Islas	76.19	6.5	16.3	9.5	40	0.7		338.44	14200	27000	9.5	31.3	16.5	2.8	11.9	12.1	16.4	4.7	9.1	1118.12	13.51	57.73	19.02	6.59	1.76	3.43	81.45	78.91	0.59	0.47	112.099	49.6994	379.995	0.07	716026	11.8	34.5	11.2	59	68.8	405	10172	1118	233		9.6
2005	Ambos sexos	Baleares, Islas				12.2	39.8	0.9	1.1		13700	25300	11	33.4	19.6	2	15.8	15.6	20.9	9.2	13.2	1129.19	13.4	56.77	20.16	5.83	1.65	3.33	82.97	80.74	0.6	0.49	113.914	48.0558	319	0.07	641468	14.5	30.7	9.6		68.8	411	10372	1130	202		9.4
2004	Ambos sexos	Baleares, Islas				13.6	39	1.5	1.8		13100	24500	8	26.6	14.4	4.2	9.6	12.3	17.7	8.3	10.4	956.71	14.01	57.61	19.76		1.66	3.25	81.82	80.29	0.62	0.51	116.098	46.672	335.171	0.07	596057	14.2	25.3	5.7		68.8	542	8888	1176	167		6.6
2003	Ambos sexos	Baleares, Islas				14.2	39.2	2	1.9		12500	23800										882.23	13.92	57.18	20.78		1.6	3.23	82.81	77.77			118.492	43.9585	340.896	0.07	549433	14.8	26.6	4.7		61.4	325	11537	1030	191
2002	Ambos sexos	Baleares, Islas				11.5	39.1	0.9			12300	24200										790.09	13.43	56.87	21.49		1.46	3.01	82.12	79.25			116.576	45.1913	329.717	0.07	504443	11.8	27.8	4.1		61.4	382	12090	1114	184
2001	Ambos sexos	Baleares, Islas				9.2	39.3	1.2			12100	23400															1.43	2.83	82.12	77.4			115.624	46.2033	278.613	0.07	457026	11.1	20.8	3.5		61.4	598	12047	912	72			1.82868
2000	Ambos sexos	Baleares, Islas				6.6	39.2	1.7	1.9		11600	22800															1.35	2.68	81.95	77.11			113.973	46.5221	263.107	0.06	394918	11.5	22.8	3.5		61.4	303	9706	899
1999	Ambos sexos	Baleares, Islas				10.4	39.8	2.8	3.2																		1.32	2.72	84.05	77.81			113.613	46.876	271.387	0.06	363733					71.6	953	5873	866
1990	Ambos sexos	Baleares, Islas
1991	Ambos sexos	Baleares, Islas																																									591	13315
1992	Ambos sexos	Baleares, Islas																																									515	7312
1993	Ambos sexos	Baleares, Islas																																									520	5043
1994	Ambos sexos	Baleares, Islas																																								72.6	1033	4525
1995	Ambos sexos	Baleares, Islas																																								72.6	1667	2420	717
1996	Ambos sexos	Baleares, Islas																									1.16	2.3	85.58	77.8												71.6	1133	4145	816
1997	Ambos sexos	Baleares, Islas																									1.3	2.47	85.3	78.56			106.838	44.0837	133.936							71.6	1510	5327	789
1998	Ambos sexos	Baleares, Islas																									1.35	2.6	82.07	79.03			109.459	45.7874	219.805	0.05	300389					71.6	1000	3663	830
1989	Ambos sexos	Baleares, Islas
1988	Ambos sexos	Baleares, Islas
1987	Ambos sexos	Baleares, Islas
1986	Ambos sexos	Baleares, Islas
1985	Ambos sexos	Baleares, Islas
1984	Ambos sexos	Baleares, Islas
1983	Ambos sexos	Baleares, Islas
1982	Ambos sexos	Baleares, Islas
1981	Ambos sexos	Baleares, Islas
1980	Ambos sexos	Baleares, Islas
1979	Ambos sexos	Baleares, Islas
1978	Ambos sexos	Baleares, Islas
1977	Ambos sexos	Baleares, Islas
1976	Ambos sexos	Baleares, Islas
1975	Ambos sexos	Baleares, Islas
2014	Hombres	Baleares, Islas	83.84	21.43
2013	Hombres	Baleares, Islas	85.29	22.67	13.9	33.9			9.9																													16.9	28.2	9.3	53.6
2012	Hombres	Baleares, Islas	84.66	22.55	12.2	40.7			16.1																	6.53												19.5	29.1	10.1	53.1
2011	Hombres	Baleares, Islas	83.22	22.55	11.9	38.3			12.7																	6.79												21.1	29	9.8	57								3.01652
2010	Hombres	Baleares, Islas	84.66	20.92	10.6	35.3			9.8																	6.48												25.9	20.9	9.9	58.9
2009	Hombres	Baleares, Islas	85.05	19.32	8.5	28.1			5																	6.47												24.2	22.5	7.5	60.1
2008	Hombres	Baleares, Islas	84.92	9.7	12.5	19.1																				6.56												19.7	21.8	7.9	60.2
2007	Hombres	Baleares, Islas	85.04	6.08	6.1	9.2																				6.63												13	21	8.5	61.7
2006	Hombres	Baleares, Islas	85.3	5.27	13.2	8.1																				6.87												8.9	25.3	8.8	60.3
2005	Hombres	Baleares, Islas				9.3																				5.92												12.7	25.1	7.7
2004	Hombres	Baleares, Islas				14.4			2.7																													14	23.3	5.1
2003	Hombres	Baleares, Islas				11.1																																13.5	22	4.2
2002	Hombres	Baleares, Islas				9.3																																10.6	25.1	4
2001	Hombres	Baleares, Islas				7.9																																9.4	19.4	2.9									2.1044
2000	Hombres	Baleares, Islas				3.7																																9	17.6	2.9
1999	Hombres	Baleares, Islas				7.3
1991	Hombres	Baleares, Islas
1992	Hombres	Baleares, Islas
1993	Hombres	Baleares, Islas
1994	Hombres	Baleares, Islas
1995	Hombres	Baleares, Islas
1996	Hombres	Baleares, Islas
1997	Hombres	Baleares, Islas
1998	Hombres	Baleares, Islas
2014	Mujeres	Baleares, Islas	72.99	18.44
2013	Mujeres	Baleares, Islas	73.74	21.94	18.4	34.3			10.6																													21.8	39.5	10.8	53.3
2012	Mujeres	Baleares, Islas	74.99	24.17	20.2	37.6			10.2																	6.26												22.9	39	10.7	54
2011	Mujeres	Baleares, Islas	72.55	21.38	18.8	29.9			7.6																	6.64												18.6	36.6	11.2	53.5								2.09066
2010	Mujeres	Baleares, Islas	72.66	19.35	14.4	28.1			4.2																	6.41												17.2	32.6	10.4	55.7
2009	Mujeres	Baleares, Islas	70.58	16.37	15.6	19.1			1.6																	6.74												17.5	32.9	11.4	56.6
2008	Mujeres	Baleares, Islas	68.49	10.84	14.2	14.9																				6.4												20.8	36.7	9.9	58
2007	Mujeres	Baleares, Islas	66.63	8.67	18.4	11.3																				6.7												18.2	34.7	10.7	60
2006	Mujeres	Baleares, Islas	66.7	8.13	18.9	11.2																				6.32												14.6	44.7	13.6	57.8
2005	Mujeres	Baleares, Islas				15.8			1.6																	5.74												16.2	36.8	11.6
2004	Mujeres	Baleares, Islas				12.8																																14.3	27.5	6.3
2003	Mujeres	Baleares, Islas				18																																16.2	31.6	5.2
2002	Mujeres	Baleares, Islas				14.4																																13.1	30.6	4.3
2001	Mujeres	Baleares, Islas				10.9																																12.9	22.3	4.2									1.56027
2000	Mujeres	Baleares, Islas				10																																14.1	28.2	4.2
1999	Mujeres	Baleares, Islas				14.2			4.9
1991	Mujeres	Baleares, Islas
1992	Mujeres	Baleares, Islas
1993	Mujeres	Baleares, Islas
1994	Mujeres	Baleares, Islas
1995	Mujeres	Baleares, Islas
1996	Mujeres	Baleares, Islas
1997	Mujeres	Baleares, Islas
1998	Mujeres	Baleares, Islas
2014	Ambos sexos	Canarias	73.62	32.54
2013	Ambos sexos	Canarias	74.34	33.92	20.1	51.9	38	18.7	25	266.11			16.8	65.6	26.3	22.7	17.2		35.5																			24.2	35.8	11.1	55.4		192	695	4699	2695	1130	15.1
2012	Ambos sexos	Canarias	74.82	32.82	19.1	49.9	38.5	15.1	19.7	283.69			9.3	62.7	24.2	21.5	19.2	30.1	40.3	14.8	7.1	1315.85	14.09	53.98		5.9					0.77	0.62				0.14	1493279	23.3	34.1	11	56.5		892	1314	5765	3242	1316	9.7
2011	Ambos sexos	Canarias	74.26	29.51	16.3	43.2	38.6	13.4	15.9	311.11	11600	20600	10.9	61.2	19.5	19.9	12.8	30.9	37.8	13.8	5.5	1354.67	13.6	52.24	19.07	5.86	1.73	3.01	81.57	85.08	0.75	0.61	111.426	48.1677	249.855	0.15	1585962	20.4	32.3	10.8	57.5	63.7	636	6955	5482	3200	1240	9.8	1.30202
2010	Ambos sexos	Canarias	72.97	28.79	14.8	40.2	38.9	12.2	15.4	276.56	11500	20600	12.8	55.5	19.9	14.7	17	26.5	35.7	16.7	6	1418.35	13.54	51.94	19.92	6.07	1.71	3.08	82.01	84.68	0.74	0.6	111.115	47.7981	272.177	0.16	1708517	21.8	33.1	11.9	57.6	65.9	384	12405	6109	3874	999	12.7
2009	Ambos sexos	Canarias	72.51	26.18	13.3	36.4	38.8	7.4	7.8	378.05	11900	20400	19.1	60.1	33.2	11.9	20.6	22.7	38.2	17.5	4.8	1494.27	13.59	52.87	19.29	5.4	1.64	2.96	82.45	83.82	0.72	0.6	110.545	46.2926	299.269	0.17	1799569	20.7	30.9	11.3	58.5	65.9	72	18472	7045	4480	812	17.6
2008	Ambos sexos	Canarias	70.82	17.37	12.7	25	39	3.5	3.2	378.75	12100	22200	10.1	49.6	20.4	9.2	18.6	23	31.5	16.5	6.7	1446.29	13.51	52.23	19.43	5.44	1.62	2.93	82.11	84.66	0.71	0.58	110.003	45.5555	330.253	0.16	1742152	16.6	33.3	11	59.7	65.9	543	29618	5156	2604	1531	10.5
2007	Ambos sexos	Canarias	70.81	10.54	20.2	16	39.2	2.3	2.2	343.89	11900	22700	8.8	51.2	19.9	6.3	15.1	22.6	29.3	12.2	3.4	1311.1	12.97	52.32	19.81	5.15	1.62	2.92	80.94	84.71	0.69	0.61	109.546	42.9865	318.585	0.15	1651539	13.4	33	11.2	59.9	66.7	1307	23176	3399	1131		7
2006	Ambos sexos	Canarias	71	11.68	16.3	17.9	39.6	2.5	2.5	279.03	11400	21800	6	59.7	33.4	6.1	17.3	23.8	34.6	16.4	5.2	1227.17	12.47	51.39	20.92	5.42	1.57	2.73	80.01	84.13	0.68	0.57	109.559	41.7682	303.718	0.16	1617241	14.1	30.3	10.8	60	66.7	975	26286	3134	777		5.9
2005	Ambos sexos	Canarias				19.1	39.6	3	2.9		11000	20600	9.3	49.9	26.7	8.1	19.1	21.7	32.2	15.3	6.6	1153.18	12.64	50.77	21.64	5.37	1.58	2.77	78.1	84.21	0.65	0.56	108.336	40.0822	265.765	0.16	1480565	14.1	33.6	11.9		66.7	2404	23213	3289	722		8.6
2004	Ambos sexos	Canarias				20.5	39.6	3.5	3.3		10600	19900	9.6	62	29.9	7.1	23.9	18.8	30.1	9.8	5.1	1046.96	12.33	51.79	22.08		1.6	2.65	78.31	84.1	0.64	0.54	104.464	37.8955	248.997	0.17	1432514	16	30.3	6.7		66.7	988	24835	3029	656		9.3
2003	Ambos sexos	Canarias				17.9	39.8	3.6	4.6		10200	19400										1001.48	12.45	51.29	21.43		1.55	2.64	79.86	84.82			105.741	39.6395	242.229	0.17	1350458	14.7	27.5	6.5		60.7	1225	24852	2792	647
2002	Ambos sexos	Canarias				17.3	39.7	3.3	3.6		9800	19100										911.22	12.84	51.43	21.07		1.53	2.53	79.95	84.72			103.537	37.4732	261.091	0.17	1277705	14.5	31.3	6.7		60.7	366	28194	2686	515
2001	Ambos sexos	Canarias				17.2	40	3.2	3.6		9400	18200															1.51	2.54	79.95	85.99			101.215	35.9204	263.738	0.18	1234283	15.2	26.3	6.2		60.7	1903	25521	2305	272			1.25167
2000	Ambos sexos	Canarias				20.1	40	5.5	5.4		8900	17500															1.41	2.43	84.34	86.1			99.3273	34.8671	249.988	0.18	1166342	13.8	21.4	5.6		60.7	1456	22883	2572
1999	Ambos sexos	Canarias				21.6	40	5.2	6.5																		1.65	2.83	86.8	88.59			97.2965	34.4391	216.629	0.2	1169804					69.1	338	18615	2421
1990	Ambos sexos	Canarias
1991	Ambos sexos	Canarias																																									949	12962
1992	Ambos sexos	Canarias																																		0.21	770390						1491	6239
1993	Ambos sexos	Canarias																																		0.2	780093						1222	5708
1994	Ambos sexos	Canarias																																		0.2	827994					68.8	1280	5025
1995	Ambos sexos	Canarias																																		0.2	900252					68.8	1399	5724	2170
1996	Ambos sexos	Canarias																									1.38	2.26	82.54	88.74						0.2	967338					69.1	2620	8285	2430
1997	Ambos sexos	Canarias																									1.47	2.33	83.12	88.62			95.6616	31.7414	204.07	0.19	985598					69.1	4395	9600	2325
1998	Ambos sexos	Canarias																									1.45	2.37	82.14	87.29			95.8118	32.1215	194.449	0.19	1059488					69.1	4031	11796	2393
1989	Ambos sexos	Canarias
1988	Ambos sexos	Canarias
1987	Ambos sexos	Canarias
1986	Ambos sexos	Canarias
1985	Ambos sexos	Canarias
1984	Ambos sexos	Canarias
1983	Ambos sexos	Canarias
1982	Ambos sexos	Canarias
1981	Ambos sexos	Canarias
1980	Ambos sexos	Canarias
1979	Ambos sexos	Canarias
1978	Ambos sexos	Canarias
1977	Ambos sexos	Canarias
1976	Ambos sexos	Canarias
1975	Ambos sexos	Canarias
2014	Hombres	Canarias	78.8	31.96
2013	Hombres	Canarias	79.71	34.54	17.1	54.8			27.2																													26.6	31.9	9.8	57.2
2012	Hombres	Canarias	80.44	32.18	15	49.7			21.4																	5.55												25.1	27.7	9.8	58.2
2011	Hombres	Canarias	80.42	29.62	13	43.2			16																	5.81												20.7	30.2	9.8	59.4								1.52576
2010	Hombres	Canarias	80.13	29.41	11.4	43.9			17.2																	6.06												24.9	31.4	10.2	58.6
2009	Hombres	Canarias	80.47	25.75	11	39			8.9																	5.52												23.2	26.6	9.8	59.5
2008	Hombres	Canarias	80.17	16.23	10.5	25.2			3																	5.48												18.1	31.1	9.5	60.6
2007	Hombres	Canarias	80.04	8.7	17.7	14.7			1.8																	5.26												13.2	31.2	10.1	61.2
2006	Hombres	Canarias	81.14	9.51	16.1	15.7			1.5																	5.58												12.6	28.1	9.7	60.6
2005	Hombres	Canarias				16.4			2.6																	5.36												13	32.5	11.1
2004	Hombres	Canarias				18.8			2.5																													14.5	28.3	5.6
2003	Hombres	Canarias				14.6			3.9																													13.3	25.6	5.8
2002	Hombres	Canarias				14.8			2.9																													13.6	27.8	5.2
2001	Hombres	Canarias				12.6			1.8																													12.9	25.6	5.2									1.44199
2000	Hombres	Canarias				14.9			3																													11.4	22.2	4.7
1999	Hombres	Canarias				15.3			3.9
1991	Hombres	Canarias
1992	Hombres	Canarias
1993	Hombres	Canarias
1994	Hombres	Canarias
1995	Hombres	Canarias
1996	Hombres	Canarias
1997	Hombres	Canarias
1998	Hombres	Canarias
2014	Mujeres	Canarias	68.38	33.21
2013	Mujeres	Canarias	68.89	33.2	23.9	48.9			22.7																													21.7	39.6	12.5	53.9
2012	Mujeres	Canarias	69.09	33.59	23.8	50.2			18																	6.23												21.4	40.6	12.3	54.9
2011	Mujeres	Canarias	67.96	29.37	20.4	43.3			15.7																	5.92												20.1	34.5	11.9	55.7								1.08135
2010	Mujeres	Canarias	65.65	28.01	19.2	36			13.3																	6.07												18.6	34.8	13.6	56.6
2009	Mujeres	Canarias	64.36	26.71	16	33.4			6.6																	5.28												18.2	35.3	12.9	57.4
2008	Mujeres	Canarias	61.21	18.9	15.2	24.7			3.5																	5.4												15.2	35.6	12.5	58.7
2007	Mujeres	Canarias	61.32	13	22.5	17.6			2.7																	5.05												13.6	34.9	12.4	58.7
2006	Mujeres	Canarias	60.56	14.67	16.4	20.5			3.6																	5.26												15.7	32.6	12	59.1
2005	Mujeres	Canarias				22.4			3.2																	5.38												15.3	34.8	12.7
2004	Mujeres	Canarias				22.5			4.2																													17.6	32.4	7.8
2003	Mujeres	Canarias				21.9			5.4																													16.1	29.5	7.2
2002	Mujeres	Canarias				20.7			4.7																													15.3	35	8.3
2001	Mujeres	Canarias				23.4			6.1																													17.5	27.1	7.2									1.0656
2000	Mujeres	Canarias				26.5			8.3																													16.2	20.6	6.4
1999	Mujeres	Canarias				29.4			9.5
1991	Mujeres	Canarias
1992	Mujeres	Canarias
1993	Mujeres	Canarias
1994	Mujeres	Canarias
1995	Mujeres	Canarias
1996	Mujeres	Canarias
1997	Mujeres	Canarias
1998	Mujeres	Canarias
2014	Ambos sexos	Cantabria	72.8	19.52
2013	Ambos sexos	Cantabria	71.86	20.53	30.5	38.5	37.8	10.1	15.7	308.63			7.6	33.2	9.9	11.1	14.9		25.3																			11.5	46.4	10.3	46.6		260	962	748	424	391	5.3
2012	Ambos sexos	Cantabria	72.03	17.95	28.6	31.5	37.9	7.9	9.9	317.31			3.1	23.1	8.6	11.9	8.1	12.1	24.1	5.4	6.8	1845.47	10.5	68.4		6.57					0.79	0.66				0.05	528072	13.8	45.2	9.6	48		436	1466	937	546	449	2.5
2011	Ambos sexos	Cantabria	71.19	15.41	26	29.8	38.1	6.2	8.8	380.01	14200	23500	8.4	34.8	14	13.6	7.2	16.8	23	8.7	9.3	1341.19	15	54.7	20.17	6.67	1.71	3.28	98.39	94.51	0.78	0.67	116.281	51.6614	339.86	0.05	572074	15	43.6	8.9	50.6	75.3	836	1805	761	447	453	8.1	0.926045
2010	Ambos sexos	Cantabria	70.61	13.74	25.5	26.1	38.7	5.2	7.6	373.78	14200	23500	2	39.9	11.9	8.9	14.1	15.1	22.5	7.9	10.4	1501.03	13.4	57.16	19.65	6.75	1.7	3.26	98.38	94.28	0.77	0.66	115.853	49.7997	351.537	0.05	579728	13.7	44.3	8.4	50.9	76.4	741	2703	797	469	423	1.4
2009	Ambos sexos	Cantabria	71.43	12.09	24.5	21.9	38.9	2.4	2.7	351.35	14800	23300	3.1	22	9.9	6.8	6.1	13	17.3	6.8	7.5	1429.05	15.32	54.34	21.41	6.28	1.8	3.3	94.13	93.7	0.76	0.65	114.344	47.2967	381.145	0.05	578220	12.3	46.2	7.3	54.3	76.4	1607	6882	752	452	335	2.5
2008	Ambos sexos	Cantabria	71.67	7.21	27.9	12.3	39.2	1.1		336.11	15100	25100	3.6	20.8	7.8	9.2	11	8.3	16.1	4.6	8	1378.09	15.51	56.67	21.33	6.25	1.81	3.36	94.62	94.15	0.77	0.66	114.034	46.3806	418.472	0.05	546190	8.9	47.1	7.9	53.9	76.4	707	7244	632	329	250	2.9
2007	Ambos sexos	Cantabria	70.99	6	27.3	9.2	39.7	1.2		393.14	14500	25100	2.9	17.1	5.9	6.6	4.4	11	16.2	4	10.3	1496.35	13.63	49.92	18.99	6.47	1.83	3.28	94.81	94.08	0.76	0.65	114.263	45.8463	452.644	0.05	508306	9.1	48	7.6	55	77.2	1128	8072	480	183		2.3
2006	Ambos sexos	Cantabria	69.78	6.51	33	10.8	39.6	1.7		287.5	13800	23600	2.3	23.9	6.2	4.3	10	11.8	16.9	4.5	7.8	1402.78	13.2	49.82	19.46	6.7	1.7	3.14	94.96	94.08	0.76	0.65	116.163	44.9664	386.675	0.04	450852	9.1	42.2	8.6	55.3	77.2	980	8864	371	159		1.8
2005	Ambos sexos	Cantabria				14.4	40	2.5	2.6		13100	21900	1	20.5	5.6	6.6	3.7	8.8	18.3	4.9	13.3	1330.7	12.44	50.46	19.9	6.33	1.67	3.15	94.15	95.47	0.76	0.63	113.867	43.4896	330.774	0.04	412703	11.4	43.9	9.9		77.2	307	5786	334	122		0.8
2004	Ambos sexos	Cantabria				19.4	41.1	5	7.1		12100	20700	2.1	28.4	9.5	3.4	8.5	7.8	16.2	4.5	11.3	1243.24	11.5	51.98	19.42		1.67	3.13	93.65	95.16	0.71	0.6	113.299	42.3277	249.405	0.04	381831	9.5	40.7	2.5		77.2	737	7680	331	134		2.6
2003	Ambos sexos	Cantabria				18.4	40.7	5.5	8.7		11500	19700										1162.94	10.52	58.05	21.04		1.61	3.12	93.34	95.27			113.024	44.9883	288.921	0.04	328811	10.6	41.4	2.3		71.8	567	7864	309	135
2002	Ambos sexos	Cantabria				18.1	41.3	4.8	8.9		10900	19500										1015.3	11.54	57.25	21.56		1.6	2.98	93.98	94.88			111.306	44.6713	310.279	0.04	317813	13	32.8	2.3		71.8	446	6519	303	112
2001	Ambos sexos	Cantabria				13	41	4.5	5.6		10300	18200															1.49	2.97	93.98	95.21			110.126	44.3873	305.842	0.04	301008	10.5	31.5	2.1		71.8	880	8855	182	51			0.731069
2000	Ambos sexos	Cantabria				24.7	41.8	7.1	12.1		9600	17300															1.44	2.84	94.14	95.3			108.268	42.1041	281.947	0.05	305138	11.2	27.4	3.1		71.8	246	4111	624
1999	Ambos sexos	Cantabria				27	41.4	9.1	13																		1.43	2.76	95.92	95.09			106.539	41.8615	339.418	0.05	280481					79.3	738	3926	575
1990	Ambos sexos	Cantabria
1991	Ambos sexos	Cantabria																																									181	1460
1992	Ambos sexos	Cantabria																																									175	1966
1993	Ambos sexos	Cantabria																																									124	2130
1994	Ambos sexos	Cantabria																																								79	378	1916
1995	Ambos sexos	Cantabria																																								79	205	1007	662
1996	Ambos sexos	Cantabria																									1.3	2.51	93.17	96.23												79.3	367	1980	740
1997	Ambos sexos	Cantabria																									1.39	2.76	93.2	96.58			95.908	39.9144	391.01							79.3	113	3028	652
1998	Ambos sexos	Cantabria																									1.39	2.77	94.56	95.71			101.296	40.8209	390.633							79.3	320	3011	649
1989	Ambos sexos	Cantabria
1988	Ambos sexos	Cantabria
1987	Ambos sexos	Cantabria
1986	Ambos sexos	Cantabria
1985	Ambos sexos	Cantabria
1984	Ambos sexos	Cantabria
1983	Ambos sexos	Cantabria
1982	Ambos sexos	Cantabria
1981	Ambos sexos	Cantabria
1980	Ambos sexos	Cantabria
1979	Ambos sexos	Cantabria
1978	Ambos sexos	Cantabria
1977	Ambos sexos	Cantabria
1976	Ambos sexos	Cantabria
1975	Ambos sexos	Cantabria
2014	Hombres	Cantabria	78.56	20.15
2013	Hombres	Cantabria	77.62	20.2	26.2	41.5			19.2																													12.8	43	9.2	45.5
2012	Hombres	Cantabria	78.02	18.29	25.3	32.7			11.6																	6.65												13.1	41.2	8.5	46.6
2011	Hombres	Cantabria	78.33	16.21	21.4	34.5			11.2																	6.52												15.6	37.3	8.5	49.3								0.742398
2010	Hombres	Cantabria	77.99	12.73	20.1	26.4			7.9																	6.96												13	38.7	8.2	50.2
2009	Hombres	Cantabria	78.67	11.64	20.2	19.9																				6.3												13	43.9	6.2	54.8
2008	Hombres	Cantabria	80.42	5.93	23.2	10.5																				6.22												8.6	43	7	53.8
2007	Hombres	Cantabria	80.55	4.48	28.4	7.6																				6.68												6.8	43.8	6.1	55
2006	Hombres	Cantabria	79.77	4.3	30.4	7.5																				6.81												7.6	39.3	7	53.8
2005	Hombres	Cantabria				11.4																				6.04												9.2	39.1	8.7
2004	Hombres	Cantabria				17.3																																8.6	37.7	2.3
2003	Hombres	Cantabria				15.9			8.9																													10.5	40.6	1.6
2002	Hombres	Cantabria				14.7			7.1																													11.8	32.1	1.5
2001	Hombres	Cantabria				8.6																																7.8	32.3	2									0.753835
2000	Hombres	Cantabria				17.4			7.9																													7.8	28.2	2.7
1999	Hombres	Cantabria				17.3			7.4
1991	Hombres	Cantabria
1992	Hombres	Cantabria
1993	Hombres	Cantabria
1994	Hombres	Cantabria
1995	Hombres	Cantabria
1996	Hombres	Cantabria
1997	Hombres	Cantabria
1998	Hombres	Cantabria
2014	Mujeres	Cantabria	66.97	18.77
2013	Mujeres	Cantabria	66.03	20.91	35.5	35.1			11.7																													10.1	49.9	11.3	47.6
2012	Mujeres	Cantabria	65.97	17.55	32.7	30.3			8																	6.49												14.6	49.3	10.7	49.4
2011	Mujeres	Cantabria	63.94	14.42	32.5	24.2			6																	6.82												14.3	50.2	9.2	51.9								1.10189
2010	Mujeres	Cantabria	63.12	15.02	31.3	25.9			7.2																	6.56												14.4	50.2	8.7	51.4
2009	Mujeres	Cantabria	64.06	12.65	29.4	24.2																				6.25												11.6	48.6	8.4	54.1
2008	Mujeres	Cantabria	62.76	8.88	32	14.4																				6.29												9.3	51.5	8.8	54
2007	Mujeres	Cantabria	61.27	8.03	26.5	11.1																				6.26												11.5	52.3	9	55.2
2006	Mujeres	Cantabria	59.67	9.49	34.5	14.7																				6.58												10.7	45.3	10.2	56.7
2005	Mujeres	Cantabria				18			3.7																	6.59												13.7	48.9	11.1
2004	Mujeres	Cantabria				21.9			9.5																													10.5	43.8	2.7
2003	Mujeres	Cantabria				21.7			8.4																													10.6	42.3	2.9
2002	Mujeres	Cantabria				22.9			11.6																													14.2	33.4	3.2
2001	Mujeres	Cantabria				18.4																																13.3	30.8	2.2									0.709748
2000	Mujeres	Cantabria				33.6			17.3																													14.6	26.5	3.5
1999	Mujeres	Cantabria				38.8			19.6
1991	Mujeres	Cantabria
1992	Mujeres	Cantabria
1993	Mujeres	Cantabria
1994	Mujeres	Cantabria
1995	Mujeres	Cantabria
1996	Mujeres	Cantabria
1997	Mujeres	Cantabria
1998	Mujeres	Cantabria
2014	Ambos sexos	Castilla - La Mancha	74.27	29.12
2013	Ambos sexos	Castilla - La Mancha	74.43	30.12	17.8	47.3	38.5	16.3	22.3	317.69			13.6	38.8	22.6	19.8	21.1		36.7																			21.5	35.2	10.5	61.3		683	3152	5132	3675	957	11.2
2012	Ambos sexos	Castilla - La Mancha	73.82	28.69	17	42.7	38.6	12.4	15.4	300.97			8	48.4	19.8	15.2	14.6	31.2	35.1	17.8	5.6	1340.46	15.95	52.41		6.69					0.82	0.74				0.15	1589616	19.4	34.4	9.8	61.8		2600	6890	6324	4342	1145	6.3
2011	Ambos sexos	Castilla - La Mancha	73.83	23.16	15.6	35.7	38.9	9.3	11.9	335.78	11800	19300	9	33.4	16.3	14.8	10.7	27.3	35.3	15.3	6.1	1512.34	16.12	52.36	19.23	6.82	1.89	3.02	98.25	96.46	0.82	0.73	128.077	38.4134	405.122	0.2	2098271	20.4	36.4	9.8	61.7	76.7	3329	8810	5400	3587	1138	7.3	0.922487
2010	Ambos sexos	Castilla - La Mancha	72.76	21.33	13.4	32.9	39.3	7.1	9.2	297.06	11800	19300	8.8	38.9	17.6	11.3	16.6	24.7	32.3	11.3	6.6	1593.46	15.86	52.08	19.95	6.79	1.89	3.14	98.23	96.2	0.82	0.73	127.969	36.2057	362.547	0.19	2033995	18.4	36.7	10.5	63.7	80	5233	21468	6353	4520	1049	7.1
2009	Ambos sexos	Castilla - La Mancha	72.54	18.97	13.9	27.7	39.2	4.3	5.5	245.47	12100	19500	10.3	34.9	18.6	6	20.1	24.8	28.6	13.7	7	1592.73	15.8	51.43	20.23	6.79	2	2.86	97.71	95.62	0.81	0.72	124.933	33.907	348.286	0.19	2001079	18.2	34.8	9.8	64.8	80	3720	34148	6668	4720	734	8.6
2008	Ambos sexos	Castilla - La Mancha	71.97	11.74	13	18.1	39.2	1.9	2.2	301.51	12100	21100	8	24.3	12.4	5	14.1	25.2	31.8	12.7	7.3	1471.93	15.86	50.68	21.24	6.21	1.76	2.84	97.16	96.12	0.81	0.73	124.642	32.698	336.63	0.17	1945709	14	30.6	9.5	66.2	80	4462	47229	4342	2845	579	6.9
2007	Ambos sexos	Castilla - La Mancha	71.16	7.7	14.8	12.2	39.5	1.5	1.6	295.62	11300	21400	4.6	29.1	12	5.1	12.4	22.1	30.8	14.4	5.9	1343.46	15.51	49.37	22.58	6.42	1.64	2.87	96.63	95.72	0.78	0.71	126.217	32.1941	308.787	0.16	1738253	12.4	34.2	10	65.7	79.9	4636	50688	2583	1235		3.8
2006	Ambos sexos	Castilla - La Mancha	70.17	8.89	17.5	14.1	39.8	1.9	1.9	253.06	10700	20000	6.7	28.7	11.5	4.7	11.4	21.6	30	12.9	7.8	1287.21	14.56	49.55	22.69	6.29	1.58	2.65	96.51	95.62	0.78	0.7	127.138	31.7585	272.066	0.15	1554195	12	32.1	9	68	79.9	3937	36088	2104	796		5.4
2005	Ambos sexos	Castilla - La Mancha				13.7	39.8	2.3	2.2		10300	18400	4.1	32.2	13	5.1	7.4	24	31.4	16.2	7.9	1156.68	13.66	46.34	25.4	6.61	1.58	2.53	95.95	95.05	0.78	0.7	127.112	29.391	231.128	0.15	1418313	12.3	30.1	8.7		79.9	2577	25190	1887	662		3.2
2004	Ambos sexos	Castilla - La Mancha				13	40.1	2.7	2.7		9900	17400	2.8	37.8	14.5	5	9.8	23.1	32.3	13.3	6.7	922.76	14.97	47.18	27.86		1.51	2.43	96.02	95.5	0.79	0.7	127.779	28.5342	226.48	0.15	1310104	10.5	23.8	4.9		79.9	1138	22381	1712	614		2.5
2003	Ambos sexos	Castilla - La Mancha				14.6	40.1	2.8	2.9		9500	16700										936.4	13.95	45.78	28.85		1.44	2.4	95.58	95.58			126.527	29.3902	249.07	0.15	1240246	10.7	26.8	5.1		76.3	1624	17433	1558	669
2002	Ambos sexos	Castilla - La Mancha				13.9	40.4	2.4	2.3		9100	16200										879.22	13.25	47.61	27.89		1.36	2.31	95.17	95.64			124.993	29.4035	272.236	0.16	1204781	10.3	26.9	4.9		76.3	281	17797	1583	727
2001	Ambos sexos	Castilla - La Mancha				15.3	40.8	3.2	3.5		8600	15200															1.24	2.17	95.17	95.84			119.692	27.8804	257.094	0.14	1012479	12.1	23.2	4.5		76.3	1611	16438	1289	528			0.591184
2000	Ambos sexos	Castilla - La Mancha				17.7	41	4.6	5.7		8100	14500															1.21	2.05	95.25	95.58			120.313	25.8843	219.065	0.14	891542	11	19.8	4.9		76.3	2273	14761	992
1999	Ambos sexos	Castilla - La Mancha				23.7	40.7	6	8.5																		1.2	2.01	94.89	95.99			119.77	25.1141	197.201							83.1	2196	14868	983
1990	Ambos sexos	Castilla - La Mancha
1991	Ambos sexos	Castilla - La Mancha																																									3871	6606
1992	Ambos sexos	Castilla - La Mancha																																									3463	5267
1993	Ambos sexos	Castilla - La Mancha																																									3677	11476
1994	Ambos sexos	Castilla - La Mancha																																								82.1	3417	13426
1995	Ambos sexos	Castilla - La Mancha																																								82.1	6024	11352	1108
1996	Ambos sexos	Castilla - La Mancha																									1.1	1.86	95.27	97.16												83.1	3820	12330	1044
1997	Ambos sexos	Castilla - La Mancha																									1.15	1.88	95.62	96.58			112.881	22.8686	189.09							83.1	4034	12389	1040
1998	Ambos sexos	Castilla - La Mancha																									1.14	1.91	96.12	96.19			117.35	24.0061	198.109							83.1	3563	11193	954
1989	Ambos sexos	Castilla - La Mancha
1988	Ambos sexos	Castilla - La Mancha
1987	Ambos sexos	Castilla - La Mancha
1986	Ambos sexos	Castilla - La Mancha
1985	Ambos sexos	Castilla - La Mancha
1984	Ambos sexos	Castilla - La Mancha
1983	Ambos sexos	Castilla - La Mancha
1982	Ambos sexos	Castilla - La Mancha
1981	Ambos sexos	Castilla - La Mancha
1980	Ambos sexos	Castilla - La Mancha
1979	Ambos sexos	Castilla - La Mancha
1978	Ambos sexos	Castilla - La Mancha
1977	Ambos sexos	Castilla - La Mancha
1976	Ambos sexos	Castilla - La Mancha
1975	Ambos sexos	Castilla - La Mancha
2014	Hombres	Castilla - La Mancha	81.68	26.19
2013	Hombres	Castilla - La Mancha	82.19	27.66	13.5	46.9			23.5																													21.5	29.3	9.8	62.6
2012	Hombres	Castilla - La Mancha	81.64	25.93	13.3	41.2			15																	6.69												19.8	31.4	9.7	62.7
2011	Hombres	Castilla - La Mancha	82.34	20.96	13	35.3			11.2																	6.77												21.3	35.4	9.4	62.2								0.971328
2010	Hombres	Castilla - La Mancha	83.06	19.33	10.9	31.9			8.9																	6.62												20.5	31.8	9.5	64.2
2009	Hombres	Castilla - La Mancha	83.17	17.29	10.2	26.7			4.9																	6.84												18.6	30.2	9	65.3
2008	Hombres	Castilla - La Mancha	83.25	9.36	10.6	15.4			1.5																	6.2												12.7	26.3	8.5	66.5
2007	Hombres	Castilla - La Mancha	84.22	5.25	14.4	9.2			1																	6.58												9	29.6	9	66.1
2006	Hombres	Castilla - La Mancha	84.79	5.36	14	10.5			1.2																	6.24												10.2	28.6	7.7	68.4
2005	Hombres	Castilla - La Mancha				9.7			1.4																	6.69												8.8	25.8	7.6
2004	Hombres	Castilla - La Mancha				7.8																																7.7	20.5	4.2
2003	Hombres	Castilla - La Mancha				9.7																																8.2	23.9	4.3
2002	Hombres	Castilla - La Mancha				9.4																																8.6	24.1	4.1
2001	Hombres	Castilla - La Mancha				10.4																																8.9	23.4	3.8									0.666335
2000	Hombres	Castilla - La Mancha				11.4			2.8																													7.7	20.3	4.2
1999	Hombres	Castilla - La Mancha				15.3			4.1
1991	Hombres	Castilla - La Mancha
1992	Hombres	Castilla - La Mancha
1993	Hombres	Castilla - La Mancha
1994	Hombres	Castilla - La Mancha
1995	Hombres	Castilla - La Mancha
1996	Hombres	Castilla - La Mancha
1997	Hombres	Castilla - La Mancha
1998	Hombres	Castilla - La Mancha
2014	Mujeres	Castilla - La Mancha	66.36	32.97
2013	Mujeres	Castilla - La Mancha	66.15	33.4	22.5	47.7			20.9																													21.4	41.6	11.2	60.1
2012	Mujeres	Castilla - La Mancha	65.43	32.38	21.1	44.5			15.8																	6.7												18.9	37.8	9.8	61
2011	Mujeres	Castilla - La Mancha	64.67	26.18	18.5	36.2			12.6																	6.87												19.4	37.6	10.3	61.3								0.873527
2010	Mujeres	Castilla - La Mancha	61.65	24.23	16.2	34.2			9.7																	6.95												16.3	42.3	11.5	62.9
2009	Mujeres	Castilla - La Mancha	61.03	21.46	18.3	29			6.2																	6.74												17.7	40	10.7	64.3
2008	Mujeres	Castilla - La Mancha	59.73	15.34	15.3	21.5			3																	6.22												15.5	35.5	10.7	65.9
2007	Mujeres	Castilla - La Mancha	57.07	11.59	15.1	16.3			2.4																	6.27												16.2	39.4	11	65.5
2006	Mujeres	Castilla - La Mancha	54.54	14.75	19.6	19.1			2.8																	6.33												13.9	36	10.4	67.5
2005	Mujeres	Castilla - La Mancha				19.1			3.4																	6.54												16.1	34.7	9.9
2004	Mujeres	Castilla - La Mancha				20.4			5.3																													13.6	27.3	5.6
2003	Mujeres	Castilla - La Mancha				21.6			5.2																													13.4	29.8	5.9
2002	Mujeres	Castilla - La Mancha				20.8			4.3																													12.1	29.9	5.6
2001	Mujeres	Castilla - La Mancha				22.6			6.5																													15.4	23	5.2									0.517465
2000	Mujeres	Castilla - La Mancha				26.4			9.5																													14.4	19.2	5.6
1999	Mujeres	Castilla - La Mancha				35.3			14.5
1991	Mujeres	Castilla - La Mancha
1992	Mujeres	Castilla - La Mancha
1993	Mujeres	Castilla - La Mancha
1994	Mujeres	Castilla - La Mancha
1995	Mujeres	Castilla - La Mancha
1996	Mujeres	Castilla - La Mancha
1997	Mujeres	Castilla - La Mancha
1998	Mujeres	Castilla - La Mancha
2014	Ambos sexos	Castilla y León	74.22	20.86
2013	Ambos sexos	Castilla y León	73.69	21.85	26.4	37.6	38.4	10.5	15.1	358.85			3.2	25.3	7.2	12.7	10.4		20.8																			14.6	40.2	11.5	54.5		628	4223	3351	1962	2253	3.1
2012	Ambos sexos	Castilla y León	73.87	19.9	24.8	35.9	38.8	8.4	12.3	347.42			6.4	28.4	11.7	9.6	7.7	15.2	20.4	6.6	11	1448.48	16.29	55.9		6.67					1.1	0.87				0.19	2045417	14.9	44.1	11.3	55.5		1965	8501	3968	2033	2917	4.8
2011	Ambos sexos	Castilla y León	73.56	16.98	23.5	31.6	38.9	6.9	10.2	363.21	14300	23800	7.4	25.1	9.2	8.1	6.9	16.6	22.3	7.7	12.5	1387.27	17.8	50.51	21.64	6.84	1.85	3.18	94.68	93.82	1.1	0.87	154.464	46.8744	374.19	0.2	2155043	15.6	47.7	11.4	57.4	75.1	2380	10732	3248	1455	2440	5.7	1.02321
2010	Ambos sexos	Castilla y León	73.02	15.92	21.4	28.2	39	5.2	6.6	356.79	14200	23400	8.5	31.4	11.6	10.4	12.5	17.8	23.8	10.1	10.6	1505.58	17.25	51.65	21.75	6.92	1.83	3.23	95.04	93.8	1.09	0.86	154.371	44.6843	351.343	0.21	2278612	13.2	46	11.2	58.2	77.7	669	16228	3770	1957	2063	7.1
2009	Ambos sexos	Castilla y León	71.98	14.07	21.4	24	39.2	3.6	3.5	348.61	14500	23100	6.7	24.3	9.9	8.3	13.1	16.5	22.1	8.7	10.8	1472.07	18.54	49.95	22.26	6.82	1.79	3.2	95.87	93.34	1.08	0.85	152.704	42.5175	307.404	0.22	2366948	14.6	44.3	10.2	59	77.7	2364	22603	3832	1918	1457	4.6
2008	Ambos sexos	Castilla y León	71.96	9.68	23.9	16.9	39.4	2	1.8	355.9	14600	24400	3.7	22	7.1	5.6	7.8	18	26.9	7.7	9.8	1510.26	16.61	52.25	21.22	6.81	1.67	3.05	95.66	93.56	1.09	0.86	150.227	41.1778	277.99	0.21	2328107	12.9	44.8	11.1	59.2	77.7	3436	34638	2936	1186	1073	2.8
2007	Ambos sexos	Castilla y León	70.96	7.17	27.1	11.8	39.5	1.6	1.2	348.82	14200	24600	4.6	23.4	6.5	5.8	4.9	18.3	25.9	10.5	9.8	1297.79	17.87	48.68	23.09	6.64	1.66	3.01	95.34	93.54	1.08	0.84	150.641	39.4545	295.387	0.2	2162349	9.4	43.6	10.7	59.8	77.8	3619	35506	2124	593		3.5
2006	Ambos sexos	Castilla y León	70.45	8.16	28.8	13.7	39.5	1.9	1.7	292.23	13500	23000	5.4	23.6	9.2	6.1	8.9	20.6	27.6	12	7.6	1341.83	15.3	53.87	21.19	6.4	1.61	2.92	95.76	93.23	1.09	0.87	152.439	37.9587	321.037	0.2	2039226	9.9	42.6	11.1	60.3	77.8	3466	38232	2181	500		4.3
2005	Ambos sexos	Castilla y León				16.2	39.3	2.2	2.6		12500	21300	3.5	22.7	9.4	7.4	6.9	21.4	28.5	13.2	8.6	1178.34	16.43	50.41	22.88	6.4	1.56	2.8	95.67	92.86	1.08	0.8	150.856	36.5112	346.391	0.21	1923242	10.6	41.1	11.8		77.8	2993	30355	2343	525		3.9
2004	Ambos sexos	Castilla y León				19.4	39.9	4	4.7		11700	20200	2.6	27.4	8.1	8.4	6.8	19.3	29.1	11	8.6	1093.41	16.65	46.61	25.61		1.55	2.78	95.41	93.28	1.07	0.81	149.367	35.7297	342.007	0.21	1822022	10.2	41.4	6.5		77.8	1614	27667	2351	548		2.5
2003	Ambos sexos	Castilla y León				19.1	40.1	4.2	5.2		11100	19200										1029.08	16.41	47.46	25.8		1.48	2.68	95.39	93.27			146.074	37.6361	350.877	0.22	1742324	9.6	38.9	6.3		72.6	1504	25313	2198	574
2002	Ambos sexos	Castilla y León				19.2	40.2	4	5.4		10500	18700										897.67	16.98	48.37	24.41		1.47	2.63	93.98	93.17			143.532	37.206	335.139	0.22	1652413	9.4	36.4	6.2		72.6	69	31686	1995	425
2001	Ambos sexos	Castilla y León				19.1	40.3	4	6.5		10100	17400															1.49	2.59	93.98	93.04			142.27	36.4731	346.006	0.22	1541422	9.7	34	5.4		72.6	355	31750	1827	316			0.550235
2000	Ambos sexos	Castilla y León				25.3	40.3	6.4	9.6		9300	16700															1.49	2.54	93.72	93.54			141.663	36.1165	330.411	0.23	1462267	9.2	34.1	6.1		72.6	1426	20820	2046
1999	Ambos sexos	Castilla y León				28.2	40.5	7.4	10.4																		1.44	2.47	95.41	94.47			135.36	34.6195	330.687							79	686	19539	2065
1990	Ambos sexos	Castilla y León
1991	Ambos sexos	Castilla y León																																									2804	10759
1992	Ambos sexos	Castilla y León																																									1850	11612
1993	Ambos sexos	Castilla y León																																									1479	11631
1994	Ambos sexos	Castilla y León																																								78.3	1985	14034
1995	Ambos sexos	Castilla y León																																								78.3	1917	12886	2426
1996	Ambos sexos	Castilla y León																									1.37	2.34	95.64	95.64												79	1550	16413	2294
1997	Ambos sexos	Castilla y León																									1.39	2.41	95.54	95.47			124.371	32.2264	296.981							79	3105	20930	2292
1998	Ambos sexos	Castilla y León																									1.41	2.4	95.38	95.18			130.28	34.2227	313.084							79	1885	18050	2207
1989	Ambos sexos	Castilla y León
1988	Ambos sexos	Castilla y León
1987	Ambos sexos	Castilla y León
1986	Ambos sexos	Castilla y León
1985	Ambos sexos	Castilla y León
1984	Ambos sexos	Castilla y León
1983	Ambos sexos	Castilla y León
1982	Ambos sexos	Castilla y León
1981	Ambos sexos	Castilla y León
1980	Ambos sexos	Castilla y León
1979	Ambos sexos	Castilla y León
1978	Ambos sexos	Castilla y León
1977	Ambos sexos	Castilla y León
1976	Ambos sexos	Castilla y León
1975	Ambos sexos	Castilla y León
2014	Hombres	Castilla y León	79.98	19.32
2013	Hombres	Castilla y León	79.27	20.34	21.2	37.5			14.8																													16.5	34.7	9.9	54.9
2012	Hombres	Castilla y León	80.98	18.13	18.2	33.6			11.7																	6.88												15.6	37.5	9.6	56.1
2011	Hombres	Castilla y León	80.6	15.79	17.3	30.5			10.1																	6.79												15.8	41.5	10	57.5								1.11977
2010	Hombres	Castilla y León	80.68	14.35	17.1	27.6			7.5																	7												13.4	39.6	9.6	58.3
2009	Hombres	Castilla y León	80.4	12.18	17.6	22.4			2.5																	6.92												13.3	35.5	8.4	59.7
2008	Hombres	Castilla y León	81.24	6.98	19.6	13			1.2																	6.89												11.3	35	9.2	60
2007	Hombres	Castilla y León	81.22	4.84	23.7	9.9			0.8																	6.7												8.7	34.9	8.9	60.4
2006	Hombres	Castilla y León	81.34	5.28	23.2	9.7			1.1																	6.38												8.1	36.3	8.9	60.4
2005	Hombres	Castilla y León				12.3			1.8																	6.48												9.5	36.8	10.1
2004	Hombres	Castilla y León				12.4			2.6																													8.4	34.2	5.5
2003	Hombres	Castilla y León				12.2			2.9																													8.3	32.6	5.4
2002	Hombres	Castilla y León				12.4			2.8																													7.5	29.1	5.2
2001	Hombres	Castilla y León				12.5			3																													8.5	28.5	4.6									0.549121
2000	Hombres	Castilla y León				17.7			5.1																													7.8	30	5
1999	Hombres	Castilla y León				20.3			6.2
1991	Hombres	Castilla y León
1992	Hombres	Castilla y León
1993	Hombres	Castilla y León
1994	Hombres	Castilla y León
1995	Hombres	Castilla y León
1996	Hombres	Castilla y León
1997	Hombres	Castilla y León
1998	Hombres	Castilla y León
2014	Mujeres	Castilla y León	68.22	22.74
2013	Mujeres	Castilla y León	67.86	23.69	31.9	37.8			15.4																													12.6	46.1	13.2	54.2
2012	Mujeres	Castilla y León	66.42	22.17	31.8	38.5			13.1																	6.49												14.2	51.2	13.1	54.8
2011	Mujeres	Castilla y León	66.16	18.5	30.3	33			10.3																	6.89												15.5	54.3	12.8	57.2								0.928772
2010	Mujeres	Castilla y León	64.95	17.98	25.9	28.8			5.6																	6.84												13.1	52.9	12.9	57.9
2009	Mujeres	Castilla y León	63.1	16.61	25.2	25.9			4.8																	6.71												15.9	53.7	12	58.3
2008	Mujeres	Castilla y León	62.14	13.41	27	21.7			2.5																	6.73												14.6	55.4	13.1	58.5
2007	Mujeres	Castilla y León	60.15	10.48	29.3	14.3			1.7																	6.58												10.1	52.8	12.7	59.1
2006	Mujeres	Castilla y León	59.03	12.33	32.3	18.6			2.5																	6.41												11.9	49.3	13.4	60.1
2005	Mujeres	Castilla y León				20.9			3.6																	6.33												11.7	45.7	13.6
2004	Mujeres	Castilla y León				28.2			7.5																													12.1	49.1	7.6
2003	Mujeres	Castilla y León				27.8			8.2																													11.1	45.6	7.3
2002	Mujeres	Castilla y León				28.1			8.8																													11.4	44.1	7.3
2001	Mujeres	Castilla y León				28.2			11.3																													10.9	39.8	6.2									0.551312
2000	Mujeres	Castilla y León				35.3			15.6																													10.5	38.3	7.2
1999	Mujeres	Castilla y León				38.2			15.7
1991	Mujeres	Castilla y León
1992	Mujeres	Castilla y León
1993	Mujeres	Castilla y León
1994	Mujeres	Castilla y León
1995	Mujeres	Castilla y León
1996	Mujeres	Castilla y León
1997	Mujeres	Castilla y León
1998	Mujeres	Castilla y León
2014	Ambos sexos	Cataluña	79	20.44
2013	Ambos sexos	Cataluña	79.06	23.24	21.9	37.4	37.6	12.1	15.9	405.83			9.4	39.8	14.1	10.8	15.1		20.1																			20.7	46.2	9.3	52.6		892	4251	18999	11701	9647	7.8
2012	Ambos sexos	Cataluña	78.73	22.67	20.8	36.4	37.8	11	13.8	407.77			12.4	42	18	11.5	13.4	16.8	22.6	8.8	13.8	1333.79	12.57	41.63		6.21					0.75	0.69				0.56	5896176	19.9	42.9	8.8	53.2		5147	8388	21471	12489	6386	10.4
2011	Ambos sexos	Cataluña	79.14	19.31	20.9	30.1	38.1	8.9	10.7	402.21	16100	28400	6.1	34.4	13.9	11.6	5.6	16.7	21.6	7.2	11.6	1380.87	12.43	40.83	17.57	6.4	1.83	3.15	94.74	90.37	0.73	0.68	139.953	63.5679	330.329	0.61	6528552	19.7	42.2	9.3	53.1	66.8	5759	24562	19051	10195	6789	5.4	1.7937
2010	Ambos sexos	Cataluña	78.39	17.79	19	28.2	38.3	7.4	9.2	417.01	16100	28200	11.2	32.3	13.9	9	14.9	15.4	19.8	7.2	12.5	1465.48	13.37	40.46	17.79	6.34	1.83	3.25	96.48	91.83	0.72	0.67	137.687	61.6072	352.587	0.63	6850584	20.8	42.7	10.1	54.5	70.3	6786	25441	24403	14417	6645	9.4
2009	Ambos sexos	Cataluña	77.89	16.31	16.1	27.7	38.6	3.9	5.5	402.83	16600	28100	8.2	38.6	12.6	5.6	16.8	14.5	19	8.6	11.3	1449.49	14	36.86	18.84	6.02	2.17	3.16	89.68	81.69	0.72	0.66	135.696	59.1306	375.111	0.64	6921137	20.8	41.4	10	55	70.3	6366	42219	25103	14624	5321	6.1
2008	Ambos sexos	Cataluña	78.31	8.93	16.9	15.3	38.7	1.5	1.6	385.39	16400	29900	7.7	27	10.7	5.2	13.2	12.6	17	7.6	12.7	1380.44	14.24	32.28	19.51	6.19	2.13	3.06	91.31	83.56	0.7	0.64	134.11	57.0471	376.271	0.59	6555837	15.4	42.6	9	54.9	70.3	6315	87518	19713	9703	3926	5.7
2007	Ambos sexos	Cataluña	77.47	6.5	19.5	9.1	38.9	1.3	0.7	419.62	15400	30400	6.8	28.7	12	5.3	12.6	11.9	16.9	6	13.2	1283.58	14.19	31.32	20.26	6.02	2.05	2.98	91.59	83.61	0.72	0.65	135.485	55.6853	370.025	0.56	6031670	12.9	39.7	9.4	54.7	76	4303	87086	12612	3910		5.6
2006	Ambos sexos	Cataluña	76.96	6.54	19	9.8	39.4	1.3	1	390.14	14900	29000	7.1	30.7	12.3	4.1	12.4	11	16.7	6.6	13.8	1169.82	13.83	29.05	21.96	6.18	2	2.9	91.59	82.91	0.73	0.7	137.718	54.6306	358.978	0.55	5510322	11.8	38.7	9.9	54.8	76	3803	80817	10924	2545		6.6
2005	Ambos sexos	Cataluña				11.7	39.3	1.5	1.4		14300	27000	7.7	34.3	16	4.7	11.5	9.3	18.1	6	13.7	1059.94	14.49	22.75	23.21	5.96	1.9	2.83	91.65	82.78	0.64	0.63	138.19	52.2729	339.162	0.53	4915910	13.2	41.2	10.4		76	5039	81441	10366	2278		6.9
2004	Ambos sexos	Cataluña				14.5	39.2	3.7	4.8		13500	26100	7.7	35.4	14.8	4.8	10.6	10	17.7	6	13.5	1001.74	14.06	22.46	24.33		1.9	2.73	90.42	81.53	0.63	0.61	137.779	51.723	306.97	0.51	4431502	12.1	39.4	3		76	5462	86558	9823	2081		8.1
2003	Ambos sexos	Cataluña				17.7	39.5	4	5.6		12900	25100										969.74	13.81	20.81	24.43		1.8	2.68	90.16	82.03			136.631	40.3038	305.142	0.5	4022267	13.1	38.4	3.4		64	3754	68798	9180	2180
2002	Ambos sexos	Cataluña				14.4	39.6	3.2	3.4		12200	24900										881.63	13.76	19.27	24.64		1.69	2.72	89.16	82.62			135.689	39.4961	304.33	0.5	3767788	12.7	37.9	2.8		64	2492	72150	9657	2638
2001	Ambos sexos	Cataluña				12.3	39.6	3.3	3.2		11700	23600															1.5	2.61	89.16	83.43			133.925	40.081	298.778	0.48	3387906	9.7	33.2	3.2		64	4738	76538	7997	1852			1.14687
2000	Ambos sexos	Cataluña				12.7	39.8	4.2	4.4		11300	22600															1.44	2.54	89.11	84.1			129.992	40.5045	271.95	0.5	3241128	10.7	29.8	3.1		64	3319	65188	8432
1999	Ambos sexos	Cataluña				16	39.6	5.5	6.3																		1.4	2.51	93.57	83.38			126.198	40.9045	270.976	0.51	3055370					76.5	1921	60432	8271
1990	Ambos sexos	Cataluña
1991	Ambos sexos	Cataluña																																									1946	30526
1992	Ambos sexos	Cataluña																																		0.55	2024082						1978	31353
1993	Ambos sexos	Cataluña																																		0.58	2230752						2685	27343
1994	Ambos sexos	Cataluña																																		0.56	2273802					75.4	3606	27197
1995	Ambos sexos	Cataluña																																		0.52	2376937					75.4	5286	27584	8315
1996	Ambos sexos	Cataluña																									1.3	2.42	85.71	82.07						0.52	2535921					76.5	6798	33299	9006
1997	Ambos sexos	Cataluña																									1.33	2.45	88.85	85.8			117.096	37.9362	318.446	0.52	2718800					76.5	5933	33679	9080
1998	Ambos sexos	Cataluña																									1.32	2.46	89.13	84.74			120.325	41.1297	304.25	0.51	2829509					76.5	5580	47691	8277
1989	Ambos sexos	Cataluña
1988	Ambos sexos	Cataluña
1987	Ambos sexos	Cataluña
1986	Ambos sexos	Cataluña
1985	Ambos sexos	Cataluña
1984	Ambos sexos	Cataluña
1983	Ambos sexos	Cataluña
1982	Ambos sexos	Cataluña
1981	Ambos sexos	Cataluña
1980	Ambos sexos	Cataluña
1979	Ambos sexos	Cataluña
1978	Ambos sexos	Cataluña
1977	Ambos sexos	Cataluña
1976	Ambos sexos	Cataluña
1975	Ambos sexos	Cataluña
2014	Hombres	Cataluña	83.33	20.77
2013	Hombres	Cataluña	83.99	23.82	17	39.7			18.7																													22.6	38.7	8.3	53.8
2012	Hombres	Cataluña	83.85	23.35	16.8	39.2			16.4																	6.23												20.5	36.8	7.6	53.8
2011	Hombres	Cataluña	84.78	19.93	16.9	33.6			12.6																	6.38												22	35	8.1	52.8								2.02228
2010	Hombres	Cataluña	84.93	18.73	15.5	31.6			10.9																	6.26												23	36.7	9.1	54.3
2009	Hombres	Cataluña	84.87	17.32	13.4	31.3			7																	6.14												23.2	37	8.8	55.1
2008	Hombres	Cataluña	86.33	9.1	13.1	17.3			2																	6.4												16.9	39.5	7.8	54.8
2007	Hombres	Cataluña	86.18	5.62	18.9	8.4			0.6																	6.15												11.4	34	8.2	54
2006	Hombres	Cataluña	85.98	5.28	19.8	8.6			0.9																	6.13												9.7	30.8	9	54.5
2005	Hombres	Cataluña				11.4			1.4																	5.96												11.9	37.5	9.5
2004	Hombres	Cataluña				14.2			5.2																													10.9	36.1	2.8
2003	Hombres	Cataluña				16.4			4.5																													12.6	36.4	3.2
2002	Hombres	Cataluña				13.3			3																													12.1	34.5	2.5
2001	Hombres	Cataluña				10.5			2.7																													8.2	31.6	2.8									1.27891
2000	Hombres	Cataluña				11.5			4.3																													9.8	29.1	3.2
1999	Hombres	Cataluña				13.8			4.8
1991	Hombres	Cataluña
1992	Hombres	Cataluña
1993	Hombres	Cataluña
1994	Hombres	Cataluña
1995	Hombres	Cataluña
1996	Hombres	Cataluña
1997	Hombres	Cataluña
1998	Hombres	Cataluña
2014	Mujeres	Cataluña	74.67	20.07
2013	Mujeres	Cataluña	74.09	22.59	27.8	34.8			12.9																													18.6	53.9	10.3	51.3
2012	Mujeres	Cataluña	73.52	21.87	25.7	33.5			11																	6.18												19.3	49.2	10.1	52.7
2011	Mujeres	Cataluña	73.35	18.57	25.9	26.3			8.7																	6.41												17.3	49.8	10.4	53.2								1.57315
2010	Mujeres	Cataluña	71.65	16.64	23.8	24.4			7.4																	6.43												18.5	49.1	11.2	54.7
2009	Mujeres	Cataluña	70.65	15.06	19.8	23.4			3.6																	5.91												18.2	46.3	11.3	55
2008	Mujeres	Cataluña	69.95	8.73	21.8	13			1.2																	5.99												13.9	46	10.3	55.1
2007	Mujeres	Cataluña	68.4	7.66	20.1	9.9			0.9																	5.9												14.5	46.1	10.6	55.4
2006	Mujeres	Cataluña	67.61	8.19	18.4	11.3			1.1																	6.23												13.9	47.4	10.9	55.1
2005	Mujeres	Cataluña				12.2			1.4																	5.95												14.5	45.4	11.3
2004	Mujeres	Cataluña				14.9			4.2																													13.3	43	3.2
2003	Mujeres	Cataluña				19.3			6.9																													13.7	40.5	3.6
2002	Mujeres	Cataluña				15.9			4																													13.2	41.6	3.2
2001	Mujeres	Cataluña				14.3			3.7																													11.3	35	3.5									1.02181
2000	Mujeres	Cataluña				14.2			4.5																													11.6	30.5	3
1999	Mujeres	Cataluña				18.7			8.1
1991	Mujeres	Cataluña
1992	Mujeres	Cataluña
1993	Mujeres	Cataluña
1994	Mujeres	Cataluña
1995	Mujeres	Cataluña
1996	Mujeres	Cataluña
1997	Mujeres	Cataluña
1998	Mujeres	Cataluña
2014	Ambos sexos	Ceuta	66.66	32.01
2013	Ambos sexos	Ceuta	71.05	35.27	15.1	62.6	37	22.7	37.4	438.45						24.7			47																			25.7		10.3	62.4		0	140	130	31	82
2012	Ambos sexos	Ceuta	69.47	37.26	13.7	65.5	37.6	18.2	35.6	444.57						23.1		33.9	38.4	23.6	5.3	1403.94	13.9	62.37		5.97					0.65	0.53						27.2		12.1	60.9		170	134	129	32	87
2011	Ambos sexos	Ceuta	65.33	27.92	8.5	45.6	36.5	13.5	20.3	257.03	13200	20900				17.2		24.1	33.6	13.7	6.5	1550.41	14.38	60.08	15.09	5.83	1.57	2.74	100	100	0.65	0.54	91.6596	35.3544	959.807			27.6		13.1	63.5	50.53	225	275	91	17	69		1.15429
2010	Ambos sexos	Ceuta	63.57	24.06	8.1	42.5	37.6	12.2	22.1	315.61	13500	21400				21.8		26.4	35.9	19.9	9.3	1567.79	14.65	59.5	15.76	5.86	1.5	2.82	100	100	0.67	0.56	94.562	31.9646	799.116			32.1	26.7	12.7	62.1	63.5	151	360	107	30	72
2009	Ambos sexos	Ceuta	64.87	18.94	8.2	32.7	37.3	7.9	13.2	277.18	14400	22000				25.3		33.4	37.3	31.6	11.6	1565.17	15.97	56.69	15.53	6.29	1.93	3.1	100	100	0.63	0.53	96.6223	31.3002	589.26			21.2	28.7	12.8	60.6	63.5	105	90	94	21	47
2008	Ambos sexos	Ceuta	64.08	17.59	13.8	34.7	38.8	7.1		261.4	14200	22700				22.4		45.9	50.4	39	3.4	1516.11	17.73	56.03	15.82	6.08	1.81	2.9	100	100	0.66	0.55	92.7015	29.0557	369.422			24.8	34.9	12.5	63.2	63.5	0	151	95	24	51
2007	Ambos sexos	Ceuta	60.9	21.1	8.4	37.4	37.4	9.8	16.3	193.78	13800	22500				13.3		39.4	40.7	32.4	6.5	1310.23	17.59	56.97	16.55		1.8	2.91	100	100	0.66	0.56	91.954	23.6851	232.672			23.1	23.1	13.1	67.4	59.7	120	418	81	16
2006	Ambos sexos	Ceuta	61.81	21.59	3.6	38	38.5	8.4	14.9	236.12	13400	21000				17.6		44.7	46.4	30.4	7.6	1246.99	17.35	56.75	17.03		1.69	3.61	100	100	0.65	0.53	82.5319	26.5781	279.769			34	29.4	13.7	71.8	59.7	34	174	91	19
2005	Ambos sexos	Ceuta				33.9	38.7	10.2	18		12700	19400				19.8		41.8	45.5	25.6	4.1	1185.65	17.69	56.12	17.45		1.74	2.84	100	100	0.63	0.54	75.6377	26.6133	373.986			30.8	32	13.3		59.7	186	247	81	15
2004	Ambos sexos	Ceuta				27.8	39.1				11700	18500				18.2		36.7	44	28.1	7.6	1123.92	17.84	56.02	17.27		1.75	2.81	100	100	0.62	0.54	74.2151	29.406	420.086			24.4		7.6		59.7	0	290	84	16
2003	Ambos sexos	Ceuta					39.5				10900	17600										1019.49	18.19	55.74	17.16		1.76	2.93	100	100			71.4091	30.8039	700.089			24.5		9		54.6	0	345	54	9
2002	Ambos sexos	Ceuta					40.3				10000	16900										908.75	17.56	56.97	16.75		1.76	2.87	100	100			69.9457	30.7761	653.293			26	26.5	7.2		54.6	0	328	75	29
2001	Ambos sexos	Ceuta					39.8				9400	15900															1.71	2.8	100	100			69.9687	23.7894	605.929			19.6	30.5	10.4		54.6	0	606	49	7			1.55683
2000	Ambos sexos	Ceuta				40	38.2	12.4	20.4		9100	15600															1.77	3.45	100	100			65.9899	23.8687	421.212			18.8	23.5	10.8		54.6	0	653	65
1999	Ambos sexos	Ceuta				47	39.6	16.5	27.4																		1.55	3.14	100	100			69.0355	23.9511	517.062							62.9	0	130	44
1990	Ambos sexos	Ceuta
1991	Ambos sexos	Ceuta																																									0	554
1992	Ambos sexos	Ceuta																																									0	648
1993	Ambos sexos	Ceuta																																									0	109
1994	Ambos sexos	Ceuta																																								64.1	0	64
1995	Ambos sexos	Ceuta																																								64.1	0	81	109
1996	Ambos sexos	Ceuta																									1.57	2.88	100	100												62.9	0	105	116
1997	Ambos sexos	Ceuta																									1.45	3.04	100	100			52.5322	24.1364	425.937							62.9	0	33	111
1998	Ambos sexos	Ceuta																									1.5	2.77	100	100			49.4871	24.0366	565.567							62.9	0	217	110
1989	Ambos sexos	Ceuta
1988	Ambos sexos	Ceuta
1987	Ambos sexos	Ceuta
1986	Ambos sexos	Ceuta
1985	Ambos sexos	Ceuta
1984	Ambos sexos	Ceuta
1983	Ambos sexos	Ceuta
1982	Ambos sexos	Ceuta
1981	Ambos sexos	Ceuta
1980	Ambos sexos	Ceuta
1979	Ambos sexos	Ceuta
1978	Ambos sexos	Ceuta
1977	Ambos sexos	Ceuta
1976	Ambos sexos	Ceuta
1975	Ambos sexos	Ceuta
2014	Hombres	Ceuta	76.02	29.1
2013	Hombres	Ceuta	79.86	29.27	6.9	64.2			42																													24.3		9.4	60.1
2012	Hombres	Ceuta	77.49	29.63	12.3	73.6			42.8																	5.86												30.6		11.6	59
2011	Hombres	Ceuta	75.48	22.29	8.4	40.9																				6.22												25.2		12	62.2								1.33594
2010	Hombres	Ceuta	76.31	21.29	5.2	40.9			28.7																	6.22												31.3	23.8	11.6	59.4
2009	Hombres	Ceuta	75.73	13.4	6.3	27																				6.16												19.3	24.1	10.8	58.9
2008	Hombres	Ceuta	78.87	12.56	11.4	23.7																				6.03													37.3	12.4	59.1
2007	Hombres	Ceuta	75.37	16.01	5.7	29.8																																		12.9	63
2006	Hombres	Ceuta	73.25	16.67	1.3	32.5																																34	39.6	13.3	70.7
2005	Hombres	Ceuta				28.3																																27.1	41.5	12.3
2004	Hombres	Ceuta																																				23.7		5.6
2003	Hombres	Ceuta																																				26		8.7
2002	Hombres	Ceuta																																				26.1		6.8
2001	Hombres	Ceuta																																						8.6									1.90159
2000	Hombres	Ceuta				30.6																																		9.8
1999	Hombres	Ceuta				43.3
1991	Hombres	Ceuta
1992	Hombres	Ceuta
1993	Hombres	Ceuta
1994	Hombres	Ceuta
1995	Hombres	Ceuta
1996	Hombres	Ceuta
1997	Hombres	Ceuta
1998	Hombres	Ceuta
2014	Mujeres	Ceuta	56	36.52
2013	Mujeres	Ceuta	61.11	44.12	23.1	60.3			31.2																													27		11.4	64.9
2012	Mujeres	Ceuta	60.59	48.08	15	56.3			27.5																	6.13												23.4		12.7	62.9
2011	Mujeres	Ceuta	53.53	37.17	8.7	52.4			25.6																	5.14												30.2		14.4	65.1								0.963209
2010	Mujeres	Ceuta	48.81	29.09	11.9	44.7																				5.57												33.1		13.9	65.1
2009	Mujeres	Ceuta	52.47	28.05	9.8	38.9																				6.43												23.2		15.1	62.5
2008	Mujeres	Ceuta	48.49	26.23	15.7	48.1																				6.13												32.8	31.9	12.6	67.5
2007	Mujeres	Ceuta	45.54	30.05	10.9	50.4																																34		13.3	71.9
2006	Mujeres	Ceuta	49.38	29.53	5.7	44.6																																34		14.2	72.9
2005	Mujeres	Ceuta				41.9																																35.1		14.3
2004	Mujeres	Ceuta																																				25.1		9.9
2003	Mujeres	Ceuta																																				22.7		9.2
2002	Mujeres	Ceuta																																				25.9	33.6	7.6
2001	Mujeres	Ceuta																																				27.7		12.1									1.21265
2000	Mujeres	Ceuta				53.8																																23.7		11.8
1999	Mujeres	Ceuta				52.6
1991	Mujeres	Ceuta
1992	Mujeres	Ceuta
1993	Mujeres	Ceuta
1994	Mujeres	Ceuta
1995	Mujeres	Ceuta
1996	Mujeres	Ceuta
1997	Mujeres	Ceuta
1998	Mujeres	Ceuta
2014	Ambos sexos	Comunidad Valenciana	74.73	25.97
2013	Ambos sexos	Comunidad Valenciana	75.02	28.2	21.3	44.8	37.4	13.8	18.9	354.85			14.4	42.7	22	16.8	21.7		31.7																			17.4	41	12.9	55.5		575	2907	11922	8389	14110	11.6
2012	Ambos sexos	Comunidad Valenciana	74.55	27.31	21.2	41.7	37.8	12.3	16.4	337.02			13.5	47.4	21.2	15	17.8	20.5	30.6	11.3	8.3	1323.96	13.39	57.22		6.27					0.75	0.56				0.38	4018278	18.2	40.1	12.7	56		2755	5738	17139	12312	16055	11.9
2011	Ambos sexos	Comunidad Valenciana	74.31	24.08	19.4	38.1	38.1	10.3	13.4	323.03	12500	21200	7.7	40.6	13.5	14.6	11.3	17.4	27.9	8.6	7.2	1361.7	13.16	53.15	23.33	6.39	1.64	2.65	94.76	92.29	0.71	0.57	133.486	58.7659	371.405	0.41	4455155	19.9	40.3	11.8	55.8	75.5	3764	7550	16003	11446	13711	7.1	1.12815
2010	Ambos sexos	Comunidad Valenciana	74.39	22.94	17.4	33.6	38	8.6	10.5	394.16	12500	21400	13.5	40.8	18.4	13.5	14.4	17.8	29.6	10.1	6.7	1380.84	13.06	51.41	25.11	6.25	1.65	2.66	94	91.73	0.72	0.58	134.096	55.7867	354.043	0.44	4742984	17.2	38	11.9	56.9	78.8	3994	21959	19171	14839	9919	11.3
2009	Ambos sexos	Comunidad Valenciana	74.82	20.85	17.2	31.9	38.3	4.5	5.5	401.88	12900	21400	16.1	39.3	18.1	7.8	17.4	15.7	26.5	7.7	9.5	1353.29	13.22	50.43	26.1	6.45	1.64	2.64	91.79	90.17	0.7	0.56	132.965	54.4156	321.787	0.46	4922607	18.8	37.6	11.2	58.1	78.8	3662	51402	18055	13210	6451	13.5
2008	Ambos sexos	Comunidad Valenciana	74.53	12.04	17.1	18.6	39.3	1.7	1.6	423.64	13200	23500	12	30.6	17.3	6.4	16.9	17.4	26.4	9.5	9	1273.01	13.21	48.96	26.15	6.21	1.59	2.57	91.04	89.77	0.7	0.52	134.173	52.5279	337.243	0.41	4631194	15.3	38	11.3	58.2	78.8	4879	80945	13098	8612	4930	10.1
2007	Ambos sexos	Comunidad Valenciana	73.36	8.78	20.2	13.4	39.5	1.4	1.2	361.54	12300	24000	6.5	28.8	13	5.8	8.9	14.7	20.5	9.5	11.8	1195.68	13.12	48.41	26.25	6.36	1.55	2.57	91.67	89.99	0.69	0.56	124.952	51.1825	332.935	0.38	4105034	12.2	39.1	10.7	58.5	77.7	5317	81358	8338	4412		6.1
2006	Ambos sexos	Comunidad Valenciana	72.92	8.37	21.4	12.6	39.5	1.4	1	336.51	11900	22900	8	30.8	15.4	6	12.7	14.1	22.5	10.4	9.9	1112.91	12.94	47.84	27.39	6.18	1.43	2.53	92	90.65	0.68	0.62	125.993	49.0612	333.323	0.37	3749679	11.5	37.8	10.7	58.9	77.7	6284	84813	6470	2778		7.2
2005	Ambos sexos	Comunidad Valenciana				13.6	39.6	2	1.7		11500	21300	8.9	36.3	17.3	5.2	9.1	15.1	24.5	9.1	8.9	1066.2	13.06	47.24	27.36	6.12	1.45	2.49	91.91	90.8	0.7	0.53	126.537	47.5797	323.166	0.37	3476510	13.4	37.4	10.7		77.7	8044	88043	5466	2221		7.1
2004	Ambos sexos	Comunidad Valenciana				14.8	39.6	2.5	2.1		11000	20500	7	43.2	21.2	5.4	11.8	15.1	25.4	9.9	8.6	989.86	13.23	46.85	28.61		1.45	2.54	93.06	91.43	0.7	0.54	126.948	46.4648	333.394	0.41	3537371	12.1	33	6.7		77.7	6955	69706	5145	2039		5.8
2003	Ambos sexos	Comunidad Valenciana				17.2	39.5	2.6	2.9		10600	19800										934.18	13.13	47.39	28.79		1.48	2.54	92.18	92.31			131.695	46.1095	329.354	0.43	3452900	12.2	27.3	6.8		72.7	9082	56039	5047	2359
2002	Ambos sexos	Comunidad Valenciana				17.1	40.3	2.3	2.7		10200	19700										845.84	13.07	47.05	28.81		1.48	2.55	91.5	92.18			133.194	44.5638	348.862	0.4	2970142	14	26.2	6.4		72.7	9208	60550	4719	2047
2001	Ambos sexos	Comunidad Valenciana				15.1	40.3	2.9	2.3		9900	18700															1.45	2.52	91.5	92.83			129.742	43.053	347.241	0.36	2525757	11.1	26.2	6.8		72.7	12252	55408	3627	1318			1.01544
2000	Ambos sexos	Comunidad Valenciana				17.2	40	3.8	3.4		9500	17800															1.43	2.5	90.97	92.48			126.261	41.2952	343.921	0.35	2282858	10.8	27	6.8		72.7	11559	41894	2742
1999	Ambos sexos	Comunidad Valenciana				21.1	40	5.6	6.6																		1.4	2.44	91.42	93.09			124.163	39.4151	355.212	0.36	2142969					81.7	12162	30285	2700
1990	Ambos sexos	Comunidad Valenciana
1991	Ambos sexos	Comunidad Valenciana																																									7445	48612
1992	Ambos sexos	Comunidad Valenciana																																		0.34	1269308						6104	25277
1993	Ambos sexos	Comunidad Valenciana																																		0.36	1365135						8347	24472
1994	Ambos sexos	Comunidad Valenciana																																		0.35	1427781					81.7	10082	22320
1995	Ambos sexos	Comunidad Valenciana																																		0.34	1551280					81.7	11443	17182	2667
1996	Ambos sexos	Comunidad Valenciana																									1.24	2.26	92.23	94.69						0.35	1685658					81.7	15798	21662	2834
1997	Ambos sexos	Comunidad Valenciana																									1.24	2.3	91.86	93.77			116.284	34.9158	329.515	0.35	1797045					81.7	15244	18780	2853
1998	Ambos sexos	Comunidad Valenciana																									1.31	2.37	91.47	93.28			120.847	36.8685	364.968	0.35	1923320					81.7	12889	20097	2764
1989	Ambos sexos	Comunidad Valenciana
1988	Ambos sexos	Comunidad Valenciana
1987	Ambos sexos	Comunidad Valenciana
1986	Ambos sexos	Comunidad Valenciana
1985	Ambos sexos	Comunidad Valenciana
1984	Ambos sexos	Comunidad Valenciana
1983	Ambos sexos	Comunidad Valenciana
1982	Ambos sexos	Comunidad Valenciana
1981	Ambos sexos	Comunidad Valenciana
1980	Ambos sexos	Comunidad Valenciana
1979	Ambos sexos	Comunidad Valenciana
1978	Ambos sexos	Comunidad Valenciana
1977	Ambos sexos	Comunidad Valenciana
1976	Ambos sexos	Comunidad Valenciana
1975	Ambos sexos	Comunidad Valenciana
2014	Hombres	Comunidad Valenciana	80.86	25.16
2013	Hombres	Comunidad Valenciana	81.1	27.27	19.5	46.7			19.6																													18.9	36.4	12.2	55.6
2012	Hombres	Comunidad Valenciana	81.39	27.45	16.7	45.4			18.3																	6.13												20	31.9	12	56.4
2011	Hombres	Comunidad Valenciana	80.83	23.8	15.6	40			14.7																	6.44												21.1	33.8	11.2	56.6								1.33605
2010	Hombres	Comunidad Valenciana	81.83	22.99	14.6	33.5			11.3																	6.3												17.3	33.7	11.2	56.8
2009	Hombres	Comunidad Valenciana	82.94	21.05	16.4	34			5.4																	6.46												19.4	31.6	10.2	58.1
2008	Hombres	Comunidad Valenciana	83.89	10.98	14.4	18.8			1.4																	6.33												14.2	30.7	10.5	58.1
2007	Hombres	Comunidad Valenciana	83.38	6.95	20.3	11.5			0.9																	6.37												11.4	32.9	9.8	57.9
2006	Hombres	Comunidad Valenciana	83.75	6.44	19.4	10.7			0.9																	6.29												10.5	32.6	9.9	58.3
2005	Hombres	Comunidad Valenciana				11.1			0.9																	6.13												12.1	31.3	10.1
2004	Hombres	Comunidad Valenciana				12.9			1.4																													10.4	31	6.3
2003	Hombres	Comunidad Valenciana				13.6			2.3																													9.7	23.5	6.3
2002	Hombres	Comunidad Valenciana				12.8			2.2																													11	23.1	6.1
2001	Hombres	Comunidad Valenciana				10.1			1.3																													9.2	25.1	6.1									1.15462
2000	Hombres	Comunidad Valenciana				12.1			1.5																													9.1	24.8	6
1999	Hombres	Comunidad Valenciana				14.9			3.9
1991	Hombres	Comunidad Valenciana
1992	Hombres	Comunidad Valenciana
1993	Hombres	Comunidad Valenciana
1994	Hombres	Comunidad Valenciana
1995	Hombres	Comunidad Valenciana
1996	Hombres	Comunidad Valenciana
1997	Hombres	Comunidad Valenciana
1998	Hombres	Comunidad Valenciana
2014	Mujeres	Comunidad Valenciana	68.5	26.94
2013	Mujeres	Comunidad Valenciana	68.82	29.33	23.3	42.6			18																													15.7	45.7	13.6	55.3
2012	Mujeres	Comunidad Valenciana	67.54	27.12	26.8	37.8			14.4																	6.42												16.5	48.8	13.5	55.6
2011	Mujeres	Comunidad Valenciana	67.61	24.43	23.9	36			12																	6.34												18.7	47.3	12.3	55								0.925213
2010	Mujeres	Comunidad Valenciana	66.72	22.88	20.9	33.7			9.7																	6.19												17.2	42.6	12.7	56.8
2009	Mujeres	Comunidad Valenciana	66.44	20.6	18.2	29.5			5.6																	6.43												18.1	44.1	12.2	58.3
2008	Mujeres	Comunidad Valenciana	64.82	13.46	20	18.4			1.9																	6.1												16.4	46	12.2	58.2
2007	Mujeres	Comunidad Valenciana	62.99	11.29	20.2	15.8			1.6																	6.35												13	46	11.6	59.2
2006	Mujeres	Comunidad Valenciana	61.74	11.07	23.1	14.8			1.1																	6.06												12.6	43.5	11.5	59.5
2005	Mujeres	Comunidad Valenciana				16.7			2.7																	6.12												14.7	44.1	11.3
2004	Mujeres	Comunidad Valenciana				17.2			2.9																													13.9	35.1	7
2003	Mujeres	Comunidad Valenciana				21.7			3.7																													14.8	31.4	7.2
2002	Mujeres	Comunidad Valenciana				22.5			3.3																													17.2	29.5	6.8
2001	Mujeres	Comunidad Valenciana				21.5			3.5																													13	27.3	7.4									0.882674
2000	Mujeres	Comunidad Valenciana				23.2			5.5																													12.4	29.3	7.7
1999	Mujeres	Comunidad Valenciana				28.5			9.8
1991	Mujeres	Comunidad Valenciana
1992	Mujeres	Comunidad Valenciana
1993	Mujeres	Comunidad Valenciana
1994	Mujeres	Comunidad Valenciana
1995	Mujeres	Comunidad Valenciana
1996	Mujeres	Comunidad Valenciana
1997	Mujeres	Comunidad Valenciana
1998	Mujeres	Comunidad Valenciana
2014	Ambos sexos	España	75.26	24.56
2013	Ambos sexos	España	75.31	26.22	22.1	42.4	38	13	17.8	343.33			10.9	42.1	18.2		18.5		27.3																			18.6	42.3	11.1	53.2							9.2
2012	Ambos sexos	España	75.28	24.93	21	40.3	38.2	11	15.1	350.21			9.9	42.1	17.9		14.7	19.7	27.2	10	10	1442.15	13.58	54.92		6.57					0.77	0.64						18.6	41.5	11	54							8.4
2011	Ambos sexos	España	74.92	21.52	20	34.6	38.5	8.9	11.9	345.81	14000	24200	7.9	37.6	14.6		11.1	19.4	26.7	10	10	1382.94	13.83	53.11	19.2	6.53	1.81	3.14	92.77	90.69	0.76	0.63						18.2	41.9	11	54.3	71.7						7	1.36753
2010	Ambos sexos	España	74.55	19.98	18.7	31.7	38.7	7.3	9.5	356.62	14000	24100	10.4	38.7	16.7		15.5	18.2	26.1	10	10	1418.44	14.2	51.33	20.75	6.58	1.8	3.2	93.06	90.39	0.75	0.62						17.8	42	11	55.3	73.8						8.7
2009	Ambos sexos	España	74.13	17.96	17.5	28.5	38.8	4.3	5.3	361.63	14500	24100	9.6	36.5	15.7		16.2	17.1	24.7	10	10	1444.72	14.33	51.27	20.56	6.45	1.81	3.06	91.37	88.35	0.74	0.61						18.1	40.7	10.6	56.3	73.8						8.1
2008	Ambos sexos	España	73.79	11.31	17.8	18.2	39.1	2	2	377.92	14500	25900	7.1	29.9	13.4		13.7	16.9	24.5	10	10	1389.88	14.47	50.67	20.6	6.36	1.76	3	91.33	88.5	0.75	0.6						14.3	41.3	10.6	56.7	73.8						6
2007	Ambos sexos	España	72.81	8.28	20.3	12.9	39.3	1.7	1.5	349.38	13700	26100	6.6	30.8	13.3		11.1	16	23.3	10	10	1274.59	14.42	49.14	21.54	5.62	1.7	2.93	91.33	88.34	0.74	0.6						12	40.9	10.6	56.9	75.7						5.6
2006	Ambos sexos	España	72.13	8.5	22.3	13.5	39.4	1.8	1.8	322.07	13200	24700	6.1	32.5	15.7		12.2	16	24	9.9	9.9	1189.48	13.88	49	22.33	5.63	1.64	2.84	91.46	88.63	0.73	0.61						11.8	39.4	10.6	57.6	75.7						5.4
2005	Ambos sexos	España				14.8	39.5	2.2	2.3		12500	22900	6.2	34.5	15.4		11.1	15.8	24.3	9.9	9.9	1100.05	14.05	47.28	23.27	6.25	1.6	2.76	91.4	88.91	0.71	0.59						13	39.9	10.8		75.7						5.5
2004	Ambos sexos	España				17.1	39.6	3.6	4.3		11800	21800	7.3	39.6	18.7		11.8	15.2	25	9.4	9.4	1027.94	14	46.75	23.98		1.59	2.73	91.38	89.16	0.72	0.59						12.5	36.9	4.8		75.7						6.6
2003	Ambos sexos	España				17.6	39.7	3.8	4.7		11200	20900										961.14	13.97	46.28	24.61		1.54	2.67	91.37	89.47								12.5	35.1	4.8		68.7
2002	Ambos sexos	España				17.3	39.9	3.7	4.5		10700	20500										881.05	13.94	46.3	24.26		1.5	2.64	89.99	88.8								12.6	34.4	4.5		68.7
2001	Ambos sexos	España				16.5	40.1	3.8	4.5		10300	19400															1.46	2.59	89.99	89.06								12	31.3	4.4		68.7							0.903033
2000	Ambos sexos	España				20.7	40.2	5.9	7.1		9700	18500															1.44	2.56	90.17	89.3								12.1	29.2	4.5		68.7
1999	Ambos sexos	España				24.2	40.2	7.2	9.3																		1.42	2.53	91.59	89.71												77.4
1990	Ambos sexos	España
1991	Ambos sexos	España
1992	Ambos sexos	España
1993	Ambos sexos	España
1994	Ambos sexos	España																																								76.4
1995	Ambos sexos	España																																								76.4
1996	Ambos sexos	España																									1.33	2.42	90.57	90.46												77.4
1997	Ambos sexos	España																									1.36	2.44	90.89	90.75												77.4
1998	Ambos sexos	España																									1.38	2.47	90.62	90.15												77.4
1989	Ambos sexos	España
1988	Ambos sexos	España
1987	Ambos sexos	España
1986	Ambos sexos	España
1985	Ambos sexos	España
1984	Ambos sexos	España
1983	Ambos sexos	España
1982	Ambos sexos	España
1981	Ambos sexos	España
1980	Ambos sexos	España
1979	Ambos sexos	España
1978	Ambos sexos	España
1977	Ambos sexos	España
1976	Ambos sexos	España
1975	Ambos sexos	España
2014	Hombres	España	80.72	23.73
2013	Hombres	España	80.9	25.73	18.2	43.7			19																													19.4	37.1	10.3	53.2
2012	Hombres	España	81.22	24.73	17.1	42.1			16.4																	6.54												19.6	36	10	53.8
2011	Hombres	España	81.46	21.17	16.5	36			12.7																	6.6												19.2	37.2	10.1	54.1								1.53401
2010	Hombres	España	81.81	19.68	15.3	33.3			10.5																	6.59												18.8	36.7	10.1	54.9
2009	Hombres	España	82.03	17.75	14.4	30.2			5.6																	6.49												19.4	35.3	9.6	56
2008	Hombres	España	82.82	10.12	14.5	17.9			1.7																	6.35												13.9	36.5	9.6	56.1
2007	Hombres	España	82.59	6.45	18	10.9			1.1																	5.69												10.4	35.8	9.5	56.1
2006	Hombres	España	82.47	6.39	19.7	11.1			1.3																	5.69												10.3	34.4	9.4	57
2005	Hombres	España				12.5			1.7																	6.25												11.1	35.4	9.8
2004	Hombres	España				14.2			3.2																													10.8	33.4	4.3
2003	Hombres	España				14.3			3.3																													10.9	32.6	4.4
2002	Hombres	España				13.4			3																													10.7	31.7	4
2001	Hombres	España				12.8			2.9																													10	29.4	4									0.97861
2000	Hombres	España				15.6			4.7																													10.2	27.9	4.1
1999	Hombres	España				18.4			6
1991	Hombres	España
1992	Hombres	España
1993	Hombres	España
1994	Hombres	España
1995	Hombres	España
1996	Hombres	España
1997	Hombres	España
1998	Hombres	España
2014	Mujeres	España	69.77	25.53
2013	Mujeres	España	69.67	26.79	26.4	41.1			16.4																													17.8	47.5	12	53.3
2012	Mujeres	España	69.26	25.17	25.6	38.3			13.7																	6.62												17.6	47.1	11.9	53.9
2011	Mujeres	España	68.27	21.94	24	33			11.1																	6.45												17.3	46.7	11.9	54.5								1.20754
2010	Mujeres	España	67.14	20.34	22.8	30			8.4																	6.57												16.8	47.5	11.9	55.7
2009	Mujeres	España	66.03	18.22	21.3	26.6			5																	6.42												16.7	46.5	11.6	56.7
2008	Mujeres	España	64.52	12.89	21.3	18.5			2.4																	6.38												14.6	46.5	11.7	57.2
2007	Mujeres	España	62.79	10.74	22.2	15.4			2.1																	5.56												13.7	46.3	11.8	57.7
2006	Mujeres	España	61.56	11.39	24.4	16.4			2.5																	5.57												13.5	44.8	11.8	58.3
2005	Mujeres	España				17.6			3.2																	6.24												14.9	44.6	11.7
2004	Mujeres	España				20.6			5.7																													14.3	40.6	5.3
2003	Mujeres	España				21.6			6.4																													14.2	37.8	5.3
2002	Mujeres	España				22.3			6.3																													14.6	37.2	5
2001	Mujeres	España				21.2			6.4																													14.1	33.3	4.9									0.831451
2000	Mujeres	España				26.7			10																													14.1	30.4	4.9
1999	Mujeres	España				31.4			13.3
1991	Mujeres	España
1992	Mujeres	España
1993	Mujeres	España
1994	Mujeres	España
1995	Mujeres	España
1996	Mujeres	España
1997	Mujeres	España
1998	Mujeres	España
2014	Ambos sexos	Extremadura	70.74	29.92
2013	Ambos sexos	Extremadura	71.71	34	16.7	52.6	37.4	15.3	22.1	270.77			8.8	47	19.5	17.8	22		36.1																			21.5	33.4	10.1	66.6		632	1338	1520	982	476	7.7
2012	Ambos sexos	Extremadura	70.6	33.17	17.3	49.5	37.9	13.7	17.7	229.85			6.1	47.1	16.1	17.9	13.1	30.4	35.2	15.8	4.2	1465.29	16.62	52.75		6.69					0.88	0.84				0.09	923795	21.9	35	10.3	67.7		1859	2781	1702	1064	564	4.7
2011	Ambos sexos	Extremadura	69.2	25.19	17.1	39.3	38.2	9.5	13.3	253.13	10800	16700	4.7	44.5	12.1	14	7.6	27.3	36	14.1	5.2	1625.03	16.73	52.04	20.53	6.34	1.65	2.82	96.59	96.43	0.87	0.83	140.237	37.4827	264.687	0.09	1010660	18.1	38.3	11.1	66.9	75.6	1829	3798	1468	825	439	5.2	0.694594
2010	Ambos sexos	Extremadura	69.48	23.07	15	36	38.7	7.8	10.8	231.17	10800	16900	7.2	46.1	22.8	15	12.1	32.9	40.3	17.1	6.2	1666.54	16.55	51.19	21.63	6.47	1.77	2.7	96.34	96.24	0.88	0.83	138.316	36.4718	237.02	0.1	1027179	18	37.5	10.2	67.1	78.5	2261	6453	1679	1114	284	6.2
2009	Ambos sexos	Extremadura	68.36	20.75	13.7	32.7	38.9	5.1	6.5	296.33	11000	16800	1.5	30.1	12.1	10.6	11.1	28.9	35.4	15.1	5.5	1694.99	16.5	51.37	21.17	6.29	1.7	2.78	97.94	96.41	0.87	0.82	139.329	35.0402	246.576	0.1	1076697	17.7	34.7	10.1	67.9	78.5	3666	7722	1528	875	154	1.5
2008	Ambos sexos	Extremadura	67.95	15.4	13.2	22.6	39.1	3.5	4.3	269.49	11100	17700	2.5	30.6	11.7	8.8	10.8	31	41.1	19.5	3.4	1616.04	17.11	50.71	20.88	6.17	1.69	2.86	96.72	96.34	0.87	0.82	138.375	33.8065	253.132	0.09	1043073	14.1	32.4	10.8	68.6	78.5	2650	9524	1219	617	107	2.2
2007	Ambos sexos	Extremadura	67.25	13.02	13.5	19.6	38.9	3.3	3.6	248.89	10900	17600	4.8	31.8	13.6	8.4	8	33.6	43.4	19.7	5.5	1498.71	16.79	50	21.5	6.14	1.66	2.66	97.04	95.91	0.85	0.8	139.041	32.2292	253.84	0.09	941058	11.9	33.5	12.4	69	79.3	2609	10915	851	318		5.4
2006	Ambos sexos	Extremadura	65.92	13.37	14.5	19.1	39.1	3.3	3.4	263.7	10300	16300	3	37.6	18.3	10.5	10	34.6	40	19.9	6.4	1332.33	17.29	48.07	23.49	6.15	1.58	2.63	97.64	96	0.86	0.81	139.251	30.3855	270.301	0.09	889539	14.5	34.3	9.2	70.6	79.3	2105	7621	877	343		3
2005	Ambos sexos	Extremadura				22.5	39.2	4.5	4.6		9600	15100	5.4	41.9	21	11	16.3	31.2	38.7	17.3	4.1	1214.66	18.49	49.03	23.93	6.3	1.53	2.59	97.13	95.85	0.85	0.81	137.655	29.157	314.653	0.09	796516	16.9	33.6	9.7		79.3	2905	8198	965	337		4.4
2004	Ambos sexos	Extremadura				25	40.5	4.8	5.1		8900	14100	5	43.2	28.3	8.7	14.6	33.2	41.2	19	6	1135.91	18.59	49.22	24.36		1.5	2.57	96.94	96.06	0.86	0.83	136.022	28.01	315.418	0.09	783175	15.3	27.6	3.3		79.3	1912	7825	913	320		4.4
2003	Ambos sexos	Extremadura				20.3	40.5	4.4	4.4		8400	13400										1072.87	18.15	49.43	24.11		1.45	2.62	95.47	95.7			135.463	27.3558	313.323	0.09	747143	13.4	26.2	3.8		75.4	2122	9668	853	325
2002	Ambos sexos	Extremadura				25	40.9	5.6	5.7		8000	13000										969.32	16.85	45.93	25.3		1.4	2.56	96.36	95.72			136.446	25.9493	286.197	0.1	766347	16.6	24.2	3.1		75.4	2254	7105	789	305
2001	Ambos sexos	Extremadura				19.5	40.6	4.1	5.5		7600	12200															1.37	2.4	96.36	96.97			136.163	24.5509	261.278	0.1	665810	16.3	19.2	3.2		75.4	2747	6811	756	240			0.364891
2000	Ambos sexos	Extremadura				31.4	40.7	8	9.9		7100	11700															1.26	2.35	95.44	96.94			134.141	23.8053	226.717	0.09	570309	17.6	21.2	2.9		75.4	2136	5640	609
1999	Ambos sexos	Extremadura				35.5	40.5	8.5	12																		1.22	2.27	96.68	98.37			130.343	22.3066	176.468							82.3	2312	5985	737
1990	Ambos sexos	Extremadura
1991	Ambos sexos	Extremadura																																									2987	1449
1992	Ambos sexos	Extremadura																																									2887	1644
1993	Ambos sexos	Extremadura																																									2553	1822
1994	Ambos sexos	Extremadura																																								80.5	4021	4558
1995	Ambos sexos	Extremadura																																								80.5	3164	3681	862
1996	Ambos sexos	Extremadura																									1.1	1.92	97.68	97.05												82.3	2536	4402	868
1997	Ambos sexos	Extremadura																									1.18	2.12	97.77	96.85			126.624	20.3503	166.476							82.3	2064	4612	765
1998	Ambos sexos	Extremadura																									1.18	2.24	98.56	98.44			130.512	21.0442	169.864							82.3	2696	4426	795
1989	Ambos sexos	Extremadura
1988	Ambos sexos	Extremadura
1987	Ambos sexos	Extremadura
1986	Ambos sexos	Extremadura
1985	Ambos sexos	Extremadura
1984	Ambos sexos	Extremadura
1983	Ambos sexos	Extremadura
1982	Ambos sexos	Extremadura
1981	Ambos sexos	Extremadura
1980	Ambos sexos	Extremadura
1979	Ambos sexos	Extremadura
1978	Ambos sexos	Extremadura
1977	Ambos sexos	Extremadura
1976	Ambos sexos	Extremadura
1975	Ambos sexos	Extremadura
2014	Hombres	Extremadura	77.78	27.34
2013	Hombres	Extremadura	77.85	32.4	12.3	52.8			21.3																													23.5	27.7	9.4	67.9
2012	Hombres	Extremadura	78.68	30.94	12.5	47.9			17.2																	6.43												23.8	26.3	9.5	69.7
2011	Hombres	Extremadura	77.93	23.19	13.9	40.2			14																	6.58												19.1	27.7	10.6	68.5								0.725601
2010	Hombres	Extremadura	78.84	20.69	10.5	36.1			10																	6.33												19.4	29	9.1	68.3
2009	Hombres	Extremadura	78.07	17.64	8.6	27.1			5.3																	6.27												16.7	28.9	9	68.3
2008	Hombres	Extremadura	79.11	11.13	9.3	16.9			2																	6.15												11.8	28.6	9.6	68.6
2007	Hombres	Extremadura	78.47	9.3	8.5	15.2			1.6																	6.21												9.8	29.1	10.3	69.3
2006	Hombres	Extremadura	78.31	10	12	14.4			2.1																	6.21												12.8	29.6	7.7	71.1
2005	Hombres	Extremadura				17.5			2.5																	6.32												14.5	31.1	8.4
2004	Hombres	Extremadura				17.5																																12.1	24.3	2.3
2003	Hombres	Extremadura				14.2																																11.5	22.9	2.5
2002	Hombres	Extremadura				16.8			3																													13.8	21.8	2.4
2001	Hombres	Extremadura				13.5																																13	16.9	3.2									0.327055
2000	Hombres	Extremadura				21.1			5																													12.9	18.3	2.8
1999	Hombres	Extremadura				28.2			7
1991	Hombres	Extremadura
1992	Hombres	Extremadura
1993	Hombres	Extremadura
1994	Hombres	Extremadura
1995	Hombres	Extremadura
1996	Hombres	Extremadura
1997	Hombres	Extremadura
1998	Hombres	Extremadura
2014	Mujeres	Extremadura	63.35	33.23
2013	Mujeres	Extremadura	65.26	36	21.6	52.3			23																													19.3	39.4	10.8	65.3
2012	Mujeres	Extremadura	62.12	36.13	22.7	51.5			18.4																	6.92												20	44	11	66
2011	Mujeres	Extremadura	60.01	27.91	20.7	38.3			12.5																	6.15												17	49.3	11.5	65.5								0.664157
2010	Mujeres	Extremadura	59.65	26.36	20	35.9			11.8																	6.6												16.4	46.2	11.4	66
2009	Mujeres	Extremadura	58.16	25.12	18.8	39.5			8																	6.32												18.7	40.8	11.3	67.7
2008	Mujeres	Extremadura	56.23	21.7	16.2	29.7			7.1																	6.2												16.6	36.4	12.1	68.6
2007	Mujeres	Extremadura	55.49	18.54	17.2	25.2			6																	6.08												14.2	38	14.6	68.7
2006	Mujeres	Extremadura	52.94	18.58	16.6	25.2			5																	6.08												16.2	39.1	10.7	70
2005	Mujeres	Extremadura				29.2			7.3																	6.27												19.5	36.1	11.1
2004	Mujeres	Extremadura				35			9.1																													18.7	31.2	4.4
2003	Mujeres	Extremadura				28.5			7.5																													15.5	29.7	5.1
2002	Mujeres	Extremadura				36.7			9.5																													19.4	26.6	3.8
2001	Mujeres	Extremadura				28.4			9.5																													19.8	21.5	3.2									0.401573
2000	Mujeres	Extremadura				44			15.9																													22.5	24.1	3
1999	Mujeres	Extremadura				45			18.4
1991	Mujeres	Extremadura
1992	Mujeres	Extremadura
1993	Mujeres	Extremadura
1994	Mujeres	Extremadura
1995	Mujeres	Extremadura
1996	Mujeres	Extremadura
1997	Mujeres	Extremadura
1998	Mujeres	Extremadura
2014	Ambos sexos	Galicia	72.89	21.82
2013	Ambos sexos	Galicia	72.92	22.22	25.8	37.7	39.3	11.1	14.6	375.47			5.2	36.1	15.9	14.2	17		24.3																			15.6	43.4	10.2	59.4		439	3188	3058	1732	1584	5.2
2012	Ambos sexos	Galicia	73.54	20.69	25.4	35.2	39.6	9.2	12.7	415.17			6	35.2	13.1	14.6	13	13.9	23.8	6.5	8.2	1332	12.84	55.9		6.49					0.81	0.65				0.21	2234178	15.4	43.1	10.4	59.1		660	5443	3488	1667	1801	6.2
2011	Ambos sexos	Galicia	72.95	17.39	24.2	30.1	39.9	7.1	8.9	344.62	13300	21800	5	30	13.2	11.8	12.1	16.3	21	8.8	10.3	1337.83	13.78	54.04	23.57	6.3	1.8	3.16	93.9	92.23	0.8	0.65	170.376	62.83	351.292	0.22	2390159	13.2	43.9	10.8	59.4	71.8	1717	8202	3226	1379	1885	5	0.912516
2010	Ambos sexos	Galicia	71.71	15.45	25.2	27	40.3	5.5	7	329.1	13200	21900	5.8	36.8	17	12.1	13.4	13.3	22.7	7.2	7.7	1438.53	13.12	51.88	26.45	6.22	1.8	3.2	94.02	92.29	0.8	0.65	165.911	60.6366	322.653	0.23	2526444	13.8	44.4	10.6	61	70.5	2261	17245	3028	1356	1887	5.7
2009	Ambos sexos	Galicia	72.04	12.56	23.9	22.3	40.6	3.3	3.5	370.74	13600	21600	5.5	33.6	16.4	7.9	13.1	14.1	24.6	8.1	6.6	1507.11	13.13	51.79	26.3	5.91	1.84	3.24	92.86	92.11	0.8	0.66	163.833	58.8221	348.077	0.24	2605417	14.4	44.2	11.5	61.9	70.5	1778	22150	3269	1523	1195	5.4
2008	Ambos sexos	Galicia	71.67	8.71	25.5	14.7	40.4	2	1.3	355.99	13700	22900	3	24.4	11	7.6	9.9	15.8	24.4	8.7	7.1	1442.11	12.51	52.52	25.93	5.87	1.77	3.2	93.3	92.08	0.8	0.64	162.988	56.0467	377.53	0.23	2544673	9	45.8	11.3	61.7	70.5	2758	34229	2609	1024	1027	3.6
2007	Ambos sexos	Galicia	70.53	7.63	26.2	12.4	40.7	2	1.7	313.55	12700	22600	4.8	27.6	12.6	7.5	9	13.8	23.1	9.9	6.2	1315.55	12.3	52.09	26.37	5.85	1.7	3.09	92.98	92.12	0.77	0.57	164.389	53.563	382.232	0.22	2339199	8.1	44.5	11.1	62.1	71	3774	33032	1934	524		4
2006	Ambos sexos	Galicia	69.63	8.43	30.7	14.2	40.8	2.3	2	298.05	12000	21000	5	28.1	15	8.7	10.8	16.5	25.6	9.5	6.1	1231.88	12.15	51.09	27.33	5.52	1.63	2.91	92.55	91.97	0.76	0.56	162.502	51.5581	311.149	0.21	2157076	9.5	42.4	11.2	62.4	71	3292	29998	1667	420		4.8
2005	Ambos sexos	Galicia				17	40.8	3.1	3.3		11200	19100	3.3	36.2	18.2	9.7	8.5	15.6	26.2	8.9	8.6	1123.49	11.77	52.05	29.52	5.56	1.59	2.78	92.55	92.48	0.74	0.53	158.986	49.7914	266.377	0.21	1945435	10.2	40.9	10.6		71	3050	29448	1700	442		3.3
2004	Ambos sexos	Galicia				22.6	41	6	7		10500	17800	4.5	43.7	23.6	9.7	8.6	17.2	27	10.2	6.2	1089.57	11.45	49.71	27.24		1.65	2.69	92.57	93.4	0.74	0.56	155.437	48.3548	246.093	0.22	1882733	10.5	38.1	6		71	3326	29345	1612	368		3.9
2003	Ambos sexos	Galicia				19.3	41	4.9	5		9900	16700										982.68	12.04	50.35	28.48		1.52	2.62	93.33	94.46			153.05	48.6859	298.442	0.22	1788500	10.8	37	5.2		65	1385	26165	1434	357
2002	Ambos sexos	Galicia				20.8	41.2	4.9	6.6		9300	16200										903.83	12.1	51.44	27.19		1.47	2.61	89.72	90.79			150.658	46.7584	308.991	0.23	1738004	11.3	33.3	5		65	2401	29824	1304	365
2001	Ambos sexos	Galicia				20.4	41.1	4.9	7.1		8800	15100															1.45	2.54	89.72	91.21			146.614	45.1862	302.985	0.23	1594952	11.9	30.7	4.4		65	2879	25649	1271	320			0.501183
2000	Ambos sexos	Galicia				24.9	41.2	7.1	9		8300	14300															1.44	2.49	89.11	90.97			142.554	44.4086	270.056	0.24	1555633	11.6	27.5	3.8		65	2401	21841	1119
1999	Ambos sexos	Galicia				28.9	41.7	8.7	11.9																		1.42	2.33	88.82	90.49			137.636	42.8391	269.205	0.26	1527291					71.4	3213	18811	1249
1990	Ambos sexos	Galicia
1991	Ambos sexos	Galicia																																									2959	10661
1992	Ambos sexos	Galicia																																		0.26	956248						2542	10755
1993	Ambos sexos	Galicia																																		0.27	1049124						1731	9916
1994	Ambos sexos	Galicia																																		0.28	1120319					69.6	2941	12021
1995	Ambos sexos	Galicia																																		0.26	1175365					69.6	3123	6793	1424
1996	Ambos sexos	Galicia																									1.33	2.21	88.28	91.61						0.26	1249733					71.4	3802	14282	1441
1997	Ambos sexos	Galicia																									1.37	2.23	87.92	91.85			127.769	38.7605	245.792	0.25	1292288					71.4	3840	15872	1405
1998	Ambos sexos	Galicia																									1.42	2.33	88.38	91.17			132.922	41.2733	266.252	0.26	1412975					71.4	3177	13788	1295
1989	Ambos sexos	Galicia
1988	Ambos sexos	Galicia
1987	Ambos sexos	Galicia
1986	Ambos sexos	Galicia
1985	Ambos sexos	Galicia
1984	Ambos sexos	Galicia
1983	Ambos sexos	Galicia
1982	Ambos sexos	Galicia
1981	Ambos sexos	Galicia
1980	Ambos sexos	Galicia
1979	Ambos sexos	Galicia
1978	Ambos sexos	Galicia
1977	Ambos sexos	Galicia
1976	Ambos sexos	Galicia
1975	Ambos sexos	Galicia
2014	Hombres	Galicia	76.79	21.8
2013	Hombres	Galicia	77.37	22.52	19.4	39.1			16.9																													16.8	37	9.2	59.1
2012	Hombres	Galicia	78.42	20.96	19.5	36.9			13.9																	6.46												16.9	36.3	9.3	58.6
2011	Hombres	Galicia	78.16	16.68	19.6	30.7			9.4																	6.4												15.1	36.8	9.9	58.6								0.966296
2010	Hombres	Galicia	77.83	14.71	19.5	28.2			8																	6.21												14.5	37.1	9.9	60.4
2009	Hombres	Galicia	78.23	11.78	20.6	23.5			3.4																	6.06												15.1	35	10.6	61
2008	Hombres	Galicia	79.35	7.43	20	13.9			1.1																	5.8												9.3	37.8	10.3	60.9
2007	Hombres	Galicia	78.6	5.77	24.1	10.2			1																	5.86												7.3	38.8	10.1	61.3
2006	Hombres	Galicia	77.3	6.05	27	11.4			1.3																	5.54												9.1	36.7	10.1	61.6
2005	Hombres	Galicia				13.1			2																	5.67												8.7	37.1	9.7
2004	Hombres	Galicia				15.5			3.1																													9.3	34.2	5.2
2003	Hombres	Galicia				14.9			3																													8.4	31.6	4.6
2002	Hombres	Galicia				14.2			3.2																													10.2	29.1	4.3
2001	Hombres	Galicia				14.1			3.4																													10.5	26.8	3.8									0.475164
2000	Hombres	Galicia				17			5.1																													9.2	26.2	3.5
1999	Hombres	Galicia				19.5			6.4
1991	Hombres	Galicia
1992	Hombres	Galicia
1993	Hombres	Galicia
1994	Hombres	Galicia
1995	Hombres	Galicia
1996	Hombres	Galicia
1997	Hombres	Galicia
1998	Hombres	Galicia
2014	Mujeres	Galicia	69.02	21.84
2013	Mujeres	Galicia	68.49	21.89	33.3	36.3			12.2																													14.4	49.9	11.1	59.8
2012	Mujeres	Galicia	68.68	20.39	32.3	33.4			11.4																	6.52												13.8	50.1	11.4	59.7
2011	Mujeres	Galicia	67.76	18.2	29.2	29.3			8.3																	6.2												11.2	51	11.7	60								0.863003
2010	Mujeres	Galicia	65.62	16.33	31.2	25.8			5.7																	6.24												13.1	51.8	11.4	61.5
2009	Mujeres	Galicia	65.88	13.47	27.2	21			3.5																	5.77												13.8	53.5	12.3	62.6
2008	Mujeres	Galicia	64.05	10.28	30.3	15.7			1.6																	5.93												8.6	53.8	12.2	62.6
2007	Mujeres	Galicia	62.55	9.96	27.7	15			2.5																	5.84												9	50.2	12	62.7
2006	Mujeres	Galicia	62.06	11.35	33.1	17.4			2.9																	5.51												9.9	48.2	12.3	63.1
2005	Mujeres	Galicia				21.5			4.8																	5.45												11.8	44.7	11.5
2004	Mujeres	Galicia				31			11.6																													11.8	41.9	6.8
2003	Mujeres	Galicia				24.6			7.4																													13.3	42.4	5.7
2002	Mujeres	Galicia				29.3			10.9																													12.4	37.4	5.6
2001	Mujeres	Galicia				28.4			11.8																													13.4	34.4	5									0.524807
2000	Mujeres	Galicia				34.4			13.8																													14.1	28.8	4.1
1999	Mujeres	Galicia				40.8			19
1991	Mujeres	Galicia
1992	Mujeres	Galicia
1993	Mujeres	Galicia
1994	Mujeres	Galicia
1995	Mujeres	Galicia
1996	Mujeres	Galicia
1997	Mujeres	Galicia
1998	Mujeres	Galicia
2014	Ambos sexos	Madrid, Comunidad de	78.76	18.83
2013	Ambos sexos	Madrid, Comunidad de	78.86	19.82	29.8	32.6	38.7	9.9	11.9	362.95			10	39.3	17.1	9.3	17.2		20.1																			14.4	54.2	13.3	39.3		4063	5323	7704	4123	11673	7.9
2012	Ambos sexos	Madrid, Comunidad de	78.99	18.68	26.2	32.1	38.8	8.1	10.7	404.24			6.8	39.7	14.4	8.2	12.2	13.8	19.8	6.1	12.8	1230.3	11.63	59.33		6.37					0.7	0.52				0.45	4745710	15.1	51.8	12.9	40.5		16602	7004	8928	4650	14250	5.6
2011	Ambos sexos	Madrid, Comunidad de	78.75	16.43	25.9	27.6	39.1	6.6	8.9	403.41	16900	31500	5.8	36.7	12.2	7.9	13.8	13.6	18.6	5.7	14.1	1371.83	10.47	62.79	14.96	6.42	1.98	3.45	92.92	88.47	0.69	0.52	169.774	97.7347	502.736	0.48	5151559	14.9	52.3	12.9	40.3	76	16178	7320	7798	3807	13340	4.9	1.92687
2010	Ambos sexos	Madrid, Comunidad de	79.34	15.95	25	26.3	39.3	5.6	7.4	408.55	16900	31300	11.3	36.8	15.2	5.6	14.3	12.1	19.3	6.2	14.2	1207.13	12.54	58.39	18.09	6.41	1.89	3.36	92.45	88.01	0.69	0.52	166.108	93.2076	443.401	0.48	5160740	14.3	53	11.8	40.9	79.1	15064	13335	8833	5101	10337	8.8
2009	Ambos sexos	Madrid, Comunidad de	78.51	13.95	21.1	23	39.1	3.2	3.8	397.85	17700	32000	11	32.5	16	5.1	15	12.3	19.6	6.8	15.5	1335.03	11.81	60.17	16.6	6.42	1.92	3.39	90.79	87.16	0.69	0.51	163.932	89.6854	398.502	0.5	5419829	15.7	49	11.5	43.5	79.1	20125	25075	9488	5506	6726	9.7
2008	Ambos sexos	Madrid, Comunidad de	77.83	8.67	23.6	14.2	39.2	1.3	1	444.11	17200	33500	9.2	32.7	15.5	3.5	16.4	11.8	19.2	4.8	12.5	1260.95	12.23	60.79	17.03	6.23	1.9	3.35	91.35	86.76	0.69	0.51	162.716	85.7877	367.934	0.47	5219898	11.4	52.2	12	43.1	79.1	16623	32554	6725	3440	4381	7.4
2007	Ambos sexos	Madrid, Comunidad de	77.15	6.29	24.9	10.9	39.5	1.1	1	391.85	16300	33900	5.8	28.1	10.8	4.5	12.7	9.9	16	6.9	10.6	1187.75	12.73	58.6	17.88	6.23	1.73	3.15	90.42	85.63	0.68	0.51	162.638	82.5363	417.142	0.46	4974376	10	50.1	11.7	43.1	78.9	20184	40008	4135	1442		4.9
2006	Ambos sexos	Madrid, Comunidad de	76.43	6.34	29.8	10.9	39.4	1.2	0.9	335.96	15900	32200	3.9	29.4	14.2	3.7	10.2	8.7	14.9	5.2	12.3	1092.25	12.19	58.47	18.73	6.29	1.67	3.08	91.9	87.37	0.65	0.5	163.756	79.1762	425.87	0.46	4662870	10.5	49.3	12	44.5	78.9	14245	61621	3691	912		2.9
2005	Ambos sexos	Madrid, Comunidad de				11.4	39.5	1.5	1.5		15100	29800	6.3	35	11.4	3.9	12.5	9.8	16.7	6.9	11.4	1026.24	11.96	58.82	18.55	6.1	1.61	3	91.57	87.96	0.64	0.51	164.055	77.4186	412.145	0.46	4271928	11.6	51	12.5		78.9	12276	58576	3543	835		5.6
2004	Ambos sexos	Madrid, Comunidad de				10.6	39.3	2.2	2.3		14300	28600	7.6	35	14.2	3.9	9.6	5.1	14.1	3.1	11.9	980.07	11.81	57.85	19.08		1.57	2.98	91.71	88.72	0.65	0.51	163.516	73.8808	331.405	0.46	3999873	9.4	45.7	3.8		78.9	11628	56256	3472	750		6.6
2003	Ambos sexos	Madrid, Comunidad de				11.2	39.4	2.7	3.2		13500	27500										870.66	12.23	56.9	20.1		1.55	2.86	91.67	88.54			159.678	74.7588	265.397	0.46	3706922	8.3	43.8	4.1		72.1	1137	42094	3316	826
2002	Ambos sexos	Madrid, Comunidad de				11.8	39.6	2.8	3.2		13100	27400										830.54	11.73	58.24	19.44		1.57	2.8	87.9	85.38			156.406	75.1121	301.23	0.46	3416792	9.3	44.9	3.7		72.1	1696	40134	3431	895
2001	Ambos sexos	Madrid, Comunidad de				13	39.6	3.2	3.4		12700	26200															1.59	2.8	87.9	85.89			150.592	72.5205	338.921	0.45	3166514	10.1	42.3	3.6		72.1	1782	34587	2899	751			1.26046
2000	Ambos sexos	Madrid, Comunidad de				17.2	39.8	5.9	6.8		12100	25200															1.64	2.86	88.36	86.37			147.972	65.831	392.596	0.44	2842273	9.8	37.8	3.9		72.1	3710	31631	2707
1999	Ambos sexos	Madrid, Comunidad de				19.7	39.8	6.5	7.6																		1.65	2.87	88.35	86.78			141.724	64.7638	372.295	0.3	1811993					79.6	6470	26880	2702
1990	Ambos sexos	Madrid, Comunidad de
1991	Ambos sexos	Madrid, Comunidad de																																									2444	13853
1992	Ambos sexos	Madrid, Comunidad de																																									1677	15360
1993	Ambos sexos	Madrid, Comunidad de																																									2780	15943
1994	Ambos sexos	Madrid, Comunidad de																																								78.9	9688	10982
1995	Ambos sexos	Madrid, Comunidad de																																								78.9	6094	14451	2933
1996	Ambos sexos	Madrid, Comunidad de																									1.56	2.82	89.33	87.84												79.6	6121	21176	2976
1997	Ambos sexos	Madrid, Comunidad de																									1.61	2.86	89.2	87.57			130.018	57.8317	317.239							79.6	16204	33823	2832
1998	Ambos sexos	Madrid, Comunidad de																									1.63	2.92	88.63	87.04			136.226	61.3448	336.458							79.6	10571	29017	2749
1989	Ambos sexos	Madrid, Comunidad de
1988	Ambos sexos	Madrid, Comunidad de
1987	Ambos sexos	Madrid, Comunidad de
1986	Ambos sexos	Madrid, Comunidad de
1985	Ambos sexos	Madrid, Comunidad de
1984	Ambos sexos	Madrid, Comunidad de
1983	Ambos sexos	Madrid, Comunidad de
1982	Ambos sexos	Madrid, Comunidad de
1981	Ambos sexos	Madrid, Comunidad de
1980	Ambos sexos	Madrid, Comunidad de
1979	Ambos sexos	Madrid, Comunidad de
1978	Ambos sexos	Madrid, Comunidad de
1977	Ambos sexos	Madrid, Comunidad de
1976	Ambos sexos	Madrid, Comunidad de
1975	Ambos sexos	Madrid, Comunidad de
2014	Hombres	Madrid, Comunidad de	83.55	18.05
2013	Hombres	Madrid, Comunidad de	83.36	19.3	27	32.8			13																													14	50	12.8	37
2012	Hombres	Madrid, Comunidad de	83.66	19.29	22.7	35.6			11.6																	6.46												15.8	47.2	11.6	39.1
2011	Hombres	Madrid, Comunidad de	84.48	16.5	22.6	28.8			9.9																	6.57												14.8	48.6	12	38.8								1.96113
2010	Hombres	Madrid, Comunidad de	85.05	15.7	22	27.9			8.6																	6.38												15.2	50	11.3	38.7
2009	Hombres	Madrid, Comunidad de	85.12	14.03	17.5	24.3			3.9																	6.56												16.8	44.3	11.1	41.4
2008	Hombres	Madrid, Comunidad de	85.36	7.9	21.1	14.2			1																	6.24												10.9	48.5	11.5	40.8
2007	Hombres	Madrid, Comunidad de	85.27	4.97	23.6	9			0.8																	6.33												8.6	45.8	10.6	40.6
2006	Hombres	Madrid, Comunidad de	84.74	4.67	29.2	9.3			0.7																	6.31												9.2	45.9	10.6	42.4
2005	Hombres	Madrid, Comunidad de				11			1.2																	6.22												9.7	44.9	11.5
2004	Hombres	Madrid, Comunidad de				10.8			1.9																													8.8	41.3	3.5
2003	Hombres	Madrid, Comunidad de				9.4			2																													8.5	43.7	4
2002	Hombres	Madrid, Comunidad de				9			2.4																													8.2	43.3	3.4
2001	Hombres	Madrid, Comunidad de				11.2			2.7																													8.9	40.6	3.3									1.22106
2000	Hombres	Madrid, Comunidad de				13.3			4.8																													8.5	36.7	3.7
1999	Hombres	Madrid, Comunidad de				14.7			5.1
1991	Hombres	Madrid, Comunidad de
1992	Hombres	Madrid, Comunidad de
1993	Hombres	Madrid, Comunidad de
1994	Hombres	Madrid, Comunidad de
1995	Hombres	Madrid, Comunidad de
1996	Hombres	Madrid, Comunidad de
1997	Hombres	Madrid, Comunidad de
1998	Hombres	Madrid, Comunidad de
2014	Mujeres	Madrid, Comunidad de	74.2	19.67
2013	Mujeres	Madrid, Comunidad de	74.56	20.37	32.6	32.3			10.9																													14.7	58.1	13.8	41.4
2012	Mujeres	Madrid, Comunidad de	74.53	18.02	30.1	28.4			9.8																	6.27												14.3	56.4	14.1	41.6
2011	Mujeres	Madrid, Comunidad de	73.24	16.36	29.6	26.2			8																	6.27												14.9	56	13.8	41.7								1.89566
2010	Mujeres	Madrid, Comunidad de	73.83	16.24	28.3	24.7			6.2																	6.44												13.4	56.1	12.2	42.9
2009	Mujeres	Madrid, Comunidad de	72.08	13.87	25.4	21.7			3.7																	6.29												14.5	53.9	11.8	45.5
2008	Mujeres	Madrid, Comunidad de	70.49	9.58	26	14.1			1																	6.22												11.9	56	12.5	45.1
2007	Mujeres	Madrid, Comunidad de	69.23	7.88	25.9	12.8			1.2																	6.15												11.4	54.4	12.7	45.2
2006	Mujeres	Madrid, Comunidad de	68.35	8.35	30.1	12.6			1.2																	6.26												11.8	52.7	13.3	46.3
2005	Mujeres	Madrid, Comunidad de				12			1.9																	5.99												13.6	57.4	13.4
2004	Mujeres	Madrid, Comunidad de				10.4			2.8																													10.1	50.2	4
2003	Mujeres	Madrid, Comunidad de				13.1			4.5																													8.1	44	4.3
2002	Mujeres	Madrid, Comunidad de				14.9			4.1																													10.4	46.6	3.9
2001	Mujeres	Madrid, Comunidad de				14.9			4.2																													11.4	44	3.8									1.29632
2000	Mujeres	Madrid, Comunidad de				21.3			8.9																													11	38.8	4
1999	Mujeres	Madrid, Comunidad de				25.1			10.4
1991	Mujeres	Madrid, Comunidad de
1992	Mujeres	Madrid, Comunidad de
1993	Mujeres	Madrid, Comunidad de
1994	Mujeres	Madrid, Comunidad de
1995	Mujeres	Madrid, Comunidad de
1996	Mujeres	Madrid, Comunidad de
1997	Mujeres	Madrid, Comunidad de
1998	Mujeres	Madrid, Comunidad de
2014	Ambos sexos	Melilla	65.01	28.45
2013	Ambos sexos	Melilla	65.71	32.63	10.6	49.2	35.4	18.2	22.1	377.78						20.5			31.4																			23.7	32.4	6.3	52.9		24	267	167	22
2012	Ambos sexos	Melilla	63.65	27.17	19.6	44.9	36.8	16.1	29.5	294.1						9.6		35.5	14.5	13.9	7.6	1367.32	26.11	54.81		6.36					0.7	0.64						20.7	24.4	9.6	55.7		3	287	201	16
2011	Ambos sexos	Melilla	65.57	22.43	11.3	39.1	36.7	13.1	17.5	276.75	11900	19000				17.8		29.7	34.7	22.2	2.5	1585.28	26.81	53.29	12.46	5.55	1.36	2.61	100	100	0.72	0.64	110.309	34.5547				16.5	26.4	15.5	52.8	50.53	42	384	193	19			1.22589
2010	Ambos sexos	Melilla	63.12	22.98	8.1	44.6	38	11.8	18.4	315.61	12200	19400				10.4		22.2	35.4	15	10.9	1644.03	26.59	53.37	12.45	6.62	1.35	2.67	100	100	0.74	0.66	113.235	25.9212				24.2	25.3	11.6	62.6	63.5	0	315	181	28
2009	Ambos sexos	Melilla	62.52	23.85	13.4	38	37.5	11.7	15.7	277.18	13100	20300				13.6		29.9	33.9	24.9	11.9	1723.66	26.66	53.76	11.96	5.9	1.25	2.6	100	100	0.74	0.68	115.014	23.8444				18.3	27.8	12.8	65.5	63.5	0	239	216	31
2008	Ambos sexos	Melilla	64.16	20.17	9.1	30.1	37.7	9		261.4	13300	21100				6		20.3	33	14.7	15.8	1730.41	26.21	54.42	11.97	6.12	1.23	2.64	100	100	0.76	0.69	108.746	22.8939				16.5	31	11.3	61.9	63.5	91	201	200	11
2007	Ambos sexos	Melilla	65.74	18.3	8.3	26.3	37.5	6.9		193.78	13700	21000				11.6		27.1	29.4	18.8	17	1593.58	25.71	54.63	11.96		1.4	3.07	100	100	0.77	0.68	93.2571	18.9428				18.1	37.8	8.9	62.1	59.7	309	310	160	10
2006	Ambos sexos	Melilla	63.13	13.69	12.8	21.8	37	5.4		236.12	13500	20300				12.7		27.8	29.7	25.3	8.8	1497.18	25.48	54.47	12.5		1.4	3.06	100	100	0.75	0.74	92.5594	19.4076				19.2	51.3	10.8	58.7	59.7	0	514	147	14
2005	Ambos sexos	Melilla				29.6	37.7	5.5			12600	18700						30.2		23.1	16.1	1464.77	26.13	53.98	12.74		1.3	2.76	100	100	0.76	0.72	88.3802	19.4736				22	35.6	13.2		59.7	0	332	156	13
2004	Ambos sexos	Melilla					37.4	10.4			11800	17600						33.6		26.4	10.2	1278.26	25.78	54.56	12.76		1.34	2.78	100	100	0.77	0.71	86.5297	17.9027				16.9				59.7	0	796	140	10
2003	Ambos sexos	Melilla					37.4				10800	16700										1131.34	26.27	54.24	12.72		1.32	2.72	100	100			94.3093	19.4606				19.8	27.2			54.6	0	1121	96	6
2002	Ambos sexos	Melilla					37.1				10100	16300										1048.77	26.71	54.24	11.87		1.35	2.69	100	100			88.6046	21.0248				19.9	31.9			54.6	326	923	97	7
2001	Ambos sexos	Melilla					37.8				9700	15600															1.36	2.81	100	100			80.0804	18.1314				13.4	26			54.6	121	990	115	4			1.71786
2000	Ambos sexos	Melilla				34.9	38.5	12.8			9200	15400															1.27	2.75	100	100			77.9673	15.2877				17.6	23.3	4.8		54.6	0	853	161
1999	Ambos sexos	Melilla				37.6	38.2	11																			1.27	2.72	100	100			75.879	13.937								62.9	102	1094	133
1990	Ambos sexos	Melilla
1991	Ambos sexos	Melilla																																									0	243
1992	Ambos sexos	Melilla																																									0	251
1993	Ambos sexos	Melilla																																									0	48
1994	Ambos sexos	Melilla																																								64.1	1	283
1995	Ambos sexos	Melilla																																								64.1	0	271	136
1996	Ambos sexos	Melilla																									1.45	2.9	100	100												62.9	12	243	190
1997	Ambos sexos	Melilla																									1.3	2.8	100	100			84.2996	14.315								62.9	175	312	149
1998	Ambos sexos	Melilla																									1.38	2.73	100	100			84.7258	14.121								62.9	0	816	144
1989	Ambos sexos	Melilla
1988	Ambos sexos	Melilla
1987	Ambos sexos	Melilla
1986	Ambos sexos	Melilla
1985	Ambos sexos	Melilla
1984	Ambos sexos	Melilla
1983	Ambos sexos	Melilla
1982	Ambos sexos	Melilla
1981	Ambos sexos	Melilla
1980	Ambos sexos	Melilla
1979	Ambos sexos	Melilla
1978	Ambos sexos	Melilla
1977	Ambos sexos	Melilla
1976	Ambos sexos	Melilla
1975	Ambos sexos	Melilla
2014	Hombres	Melilla	74.08	23.11
2013	Hombres	Melilla	75.38	33.2	6.3	54.9			22.8																													19.6		6.9	46.7
2012	Hombres	Melilla	73.69	22.76	5	42.3			26.4																	5.93												23.5		10.5	47.5
2011	Hombres	Melilla	75.93	18.95	8.7	28.7																				6.18														13	47.7								1.96919
2010	Hombres	Melilla	74.91	17.98	2.1	38.2																				6.23												19.1		10.8	59.3
2009	Hombres	Melilla	74	18.09	4.7	26.8																				6.05														10.8	63.8
2008	Hombres	Melilla	81.3	15.51	3.2	24.5																				5.91														7.8	57.4
2007	Hombres	Melilla	79.59	12.47	3.1																																		37.5	8.6	58.7
2006	Hombres	Melilla	78.78	8.61	10.7																																			10.3	54.2
2005	Hombres	Melilla																																						10.9
2004	Hombres	Melilla
2003	Hombres	Melilla
2002	Hombres	Melilla
2001	Hombres	Melilla																																															1.69456
2000	Hombres	Melilla
1999	Hombres	Melilla
1991	Hombres	Melilla
1992	Hombres	Melilla
1993	Hombres	Melilla
1994	Hombres	Melilla
1995	Hombres	Melilla
1996	Hombres	Melilla
1997	Hombres	Melilla
1998	Hombres	Melilla
2014	Mujeres	Melilla	56.07	35.41
2013	Mujeres	Melilla	55.67	31.83	17.1	38.8																																27.8	30.2	5.7	59.3
2012	Mujeres	Melilla	52.63	33.94	34.7	49.1			34.5																	6.9														8.6	64.3
2011	Mujeres	Melilla	54.84	27.41	13.8	56.9																				5.19														18	57.7								0.420946
2010	Mujeres	Melilla	51	30.53	13.5	55.9																				6.91												29.3		12.5	65.8
2009	Mujeres	Melilla	50.96	32.28	20.5	51.7																				5.75												24.3		14.7	67.2
2008	Mujeres	Melilla	45.93	28.95	15.1	40.5																				6.34														14.9	66.4
2007	Mujeres	Melilla	51.42	27.63	12	34.9																																26.7	38.1	9.2	65.5
2006	Mujeres	Melilla	47.62	22.03	14.1	28.5																																23.9	54.1	11.2	63
2005	Mujeres	Melilla				41.4																																27.3		15.3
2004	Mujeres	Melilla																																				23.3
2003	Mujeres	Melilla																																				29.5
2002	Mujeres	Melilla																																				30	36.6
2001	Mujeres	Melilla																																															1.73988
2000	Mujeres	Melilla																																				22.2
1999	Mujeres	Melilla
1991	Mujeres	Melilla
1992	Mujeres	Melilla
1993	Mujeres	Melilla
1994	Mujeres	Melilla
1995	Mujeres	Melilla
1996	Mujeres	Melilla
1997	Mujeres	Melilla
1998	Mujeres	Melilla
2014	Ambos sexos	Murcia, Región de	74.36	26.7
2013	Ambos sexos	Murcia, Región de	74.24	29.15	18	44.3	38	13.2	15.6	297.39			22.6	52.5	26.7	17.3	26		34.1																			16.6	29.3	11.6	58.2		67	881	2894	2304	1009	19.7
2012	Ambos sexos	Murcia, Región de	74.45	27.73	17.2	41.1	38.3	11.7	15.7	339.13			12.6	57.1	27.9	16	27.4	27	33.5	12.9	5.7	1512.06	13.33	56.22		6.81					0.77	0.59				0.12	1298666	17.7	27.6	10.9	59.1		599	2984	3962	3053	1221	11.2
2011	Ambos sexos	Murcia, Región de	73.95	25.07	14	38.3	38.2	10.3	13.6	274.13	11400	19700	10.3	49	22.3	14.5	12.8	24.4	31.9	8.4	6.2	1622.13	12.79	55.58	18.63	6.39	1.79	3	95.41	90.79	0.75	0.57	107.048	63.7126	387.166	0.13	1412578	19.9	32.6	10.7	59.6	75.5	538	3244	3508	2611	833	9.7	1.44124
2010	Ambos sexos	Murcia, Región de	74.15	22.95	13.2	32.9	38.6	8.2	9.2	330.74	11600	20100	19.4	51.9	32.2	11.2	26.1	26.3	37.5	17.2	6.9	1613.32	12.52	54.31	20.52	6.41	1.74	2.96	94.58	90.25	0.73	0.54	106.802	60.7076	402.896	0.14	1476744	19.2	29.3	10.8	61.3	79.6	950	12877	4096	3306	260	17
2009	Ambos sexos	Murcia, Región de	73.19	20.39	12.5	29.6	38.7	4.2	5.3	253.51	12000	20200	16.7	47.2	24.3	7.6	28.1	24.9	33.3	15.2	6.1	1646.2	12.05	54.78	20.02	6.21	1.63	2.97	94.35	90.91	0.73	0.55	105.646	58.0569	417.831	0.14	1481012	17.8	32.1	10.5	61.7	79.6	1224	22198	4091	3272	108	15
2008	Ambos sexos	Murcia, Región de	73.32	12.51	13.6	18.9	39.5	1.7	1.5	285.37	12100	22000	6.5	35.2	17.4	5.5	15.4	22.5	28.8	17.8	7.9	1581.62	11.21	54.64	20.32	6.12	1.56	2.94	94.36	91.03	0.74	0.55	105.849	55.8318	396.987	0.12	1391892	16	32.3	10.2	62.4	79.6	1306	32528	2871	2056	93	4.2
2007	Ambos sexos	Murcia, Región de	72.07	7.56	13.6	11.5	39.7	1.1	1	302.7	11000	22300	10.1	37	22.2	5	16.9	21	31	14.5	8.8	1326.09	10.93	52.77	22.6	5.94	1.56	2.86	93.76	90.31	0.67	0.51	105.591	55.1318	366.587	0.11	1208150	13.6	34.2	10.2	61.9	77.1	1079	33259	1333	692		7.9
2006	Ambos sexos	Murcia, Región de	70.94	7.91	16.5	12.2	39.6	1.3	1.5	285.48	10500	21100	7.4	46.6	20.4	6.9	15	22.9	33.5	15.2	10.4	1217.93	12.77	49.99	23.76	6.27	1.47	2.68	93.67	90.7	0.63	0.48	106.129	54.5425	295.623	0.11	1068853	12.5	31.4	9.5	62.6	77.1	1197	41876	1088	468		5.8
2005	Ambos sexos	Murcia, Región de				13	40.2	1.4	1.3		10200	19600	6.3	41.9	19.8	7.2	18.3	20.8	29.1	13.7	9.2	1142.29	12.61	49.47	24.14	6.01	1.46	2.53	92.93	90.49	0.63	0.5	107.611	53.6535	341.5	0.1	950782	14.1	31.4	8.9		77.1	1471	23258	997	395		5.8
2004	Ambos sexos	Murcia, Región de				16.2	39.8	2.5	2.3		9600	18600	14.4	49.1	31.6	6.3	21.1	20.6	30.1	14	8.7	1060.95	13	49.18	25.05		1.46	2.54	92.55	90.77	0.65	0.5	109.584	49.0245	358.526	0.1	890804	13.3	33.9	5.8		77.1	1613	21054	843	305		11.6
2003	Ambos sexos	Murcia, Región de				14.4	39.9	2.7	2.7		9300	17800										973.63	13.71	48.63	25.67		1.43	2.49	93.24	91.93			109.245	42.8177	373.514	0.11	846313	13.8	31.3	5.6		73.5	1731	13929	763	349
2002	Ambos sexos	Murcia, Región de				17.5	39.4	2.6	2.9		9200	17400										881.55	13.97	48.91	25.28		1.39	2.46	93.28	92.68			109.229	44.0863	361.903	0.11	791902	13.2	31.1	4.9		73.5	2767	11592	792	362
2001	Ambos sexos	Murcia, Región de				14.7	39.9	2.1	2.5		8600	16200															1.45	2.52	93.28	91.68			110.32	42.7427	366.017	0.1	730010	13.2	28.6	5		73.5	3165	11846	664	275			0.957289
2000	Ambos sexos	Murcia, Región de				18.8	40	3.2	3.4		8200	15500															1.45	2.43	92.13	92.91			108.234	39.9621	379.769	0.11	683384	14	23.9	4.6		73.5	3486	8402	471
1999	Ambos sexos	Murcia, Región de				23.1	39.8	5.8	8.1																		1.34	2.39	94.64	94.73			106.183	36.0373	330.298	0.07	387992					82	3182	7341	469
1990	Ambos sexos	Murcia, Región de
1991	Ambos sexos	Murcia, Región de																																									3401	12534
1992	Ambos sexos	Murcia, Región de																																									246	7044
1993	Ambos sexos	Murcia, Región de																																									2589	6427
1994	Ambos sexos	Murcia, Región de																																								81.6	3396	6248
1995	Ambos sexos	Murcia, Región de																																								81.6	3555	3803	443
1996	Ambos sexos	Murcia, Región de																									1.27	2.29	94.28	95.84												82	4579	4944	424
1997	Ambos sexos	Murcia, Región de																									1.31	2.33	93.33	95.73			100.218	28.9798	266.201							82	3684	4988	408
1998	Ambos sexos	Murcia, Región de																									1.34	2.34	94.06	95.25			103.154	32.9347	310.705							82	3737	4797	432
1989	Ambos sexos	Murcia, Región de
1988	Ambos sexos	Murcia, Región de
1987	Ambos sexos	Murcia, Región de
1986	Ambos sexos	Murcia, Región de
1985	Ambos sexos	Murcia, Región de
1984	Ambos sexos	Murcia, Región de
1983	Ambos sexos	Murcia, Región de
1982	Ambos sexos	Murcia, Región de
1981	Ambos sexos	Murcia, Región de
1980	Ambos sexos	Murcia, Región de
1979	Ambos sexos	Murcia, Región de
1978	Ambos sexos	Murcia, Región de
1977	Ambos sexos	Murcia, Región de
1976	Ambos sexos	Murcia, Región de
1975	Ambos sexos	Murcia, Región de
2014	Hombres	Murcia, Región de	81.35	24.69
2013	Hombres	Murcia, Región de	81.81	28.74	14.4	45			17.3																													17	22.5	10.9	58.3
2012	Hombres	Murcia, Región de	81.33	27.93	13.4	42.8			17.5																	6.81												18.3	21.6	11.2	59.4
2011	Hombres	Murcia, Región de	81.88	25.13	11.9	39.4			15.2																	6.42												20.1	27.7	10.9	59								1.89871
2010	Hombres	Murcia, Región de	82.57	23.27	11.9	34.5			9.3																	6.58												20.2	23.2	10.4	60.4
2009	Hombres	Murcia, Región de	82.34	21.73	12	33.7			6.2																	6.34												19.1	29.3	10.6	60.8
2008	Hombres	Murcia, Región de	83.36	12.03	10.6	19.9			1.6																	5.95												15.9	27.3	10.3	61.8
2007	Hombres	Murcia, Región de	84.15	5.99	11.8	9																				6.11												11	32.3	9.5	61.1
2006	Hombres	Murcia, Región de	82.95	6	14.3	9.3			1.2																	6.43												9.8	28.7	8.7	61.3
2005	Hombres	Murcia, Región de				10.3																				5.95												10.2	26	8.4
2004	Hombres	Murcia, Región de				11.7			1.8																													9.1	32.5	5.3
2003	Hombres	Murcia, Región de				10.6																																9.4	31.5	4.9
2002	Hombres	Murcia, Región de				12.6																																9.1	28.9	4.2
2001	Hombres	Murcia, Región de				10.6																																9.5	25.4	4.3									1.21329
2000	Hombres	Murcia, Región de				12.4			3.1																													10.7	22.8	3.9
1999	Hombres	Murcia, Región de				15.3			5.7
1991	Hombres	Murcia, Región de
1992	Hombres	Murcia, Región de
1993	Hombres	Murcia, Región de
1994	Hombres	Murcia, Región de
1995	Hombres	Murcia, Región de
1996	Hombres	Murcia, Región de
1997	Hombres	Murcia, Región de
1998	Hombres	Murcia, Región de
2014	Mujeres	Murcia, Región de	67.05	29.26
2013	Mujeres	Murcia, Región de	66.3	29.66	22.4	43.4			13.6																													16.2	36.6	12.3	58
2012	Mujeres	Murcia, Región de	67.18	27.47	22	39.1			13.7																	6.81												17.1	34.3	10.5	58.9
2011	Mujeres	Murcia, Región de	65.52	25	16.8	37			11.7																	6.36												19.8	38.2	10.4	60.3								0.979202
2010	Mujeres	Murcia, Región de	65.17	22.53	15	30.8			9.2																	6.27												18.2	36.3	11.4	62.1
2009	Mujeres	Murcia, Región de	63.38	18.52	13.5	24.5			4.1																	6.08												16.4	35.4	10.4	62.6
2008	Mujeres	Murcia, Región de	62.53	13.2	17.6	17.5			1.5																	6.3												16	38.1	10.2	63.2
2007	Mujeres	Murcia, Región de	59.06	9.96	15.3	15			1.4																	5.76												16.5	36.3	10.9	62.8
2006	Mujeres	Murcia, Región de	57.97	10.85	18.4	16.1			1.8																	6.1												15.4	34.5	10.4	64
2005	Mujeres	Murcia, Región de				16.8			2.6																	6.06												18.5	37.6	9.3
2004	Mujeres	Murcia, Región de				22.8			2.9																													17.9	35.5	6.3
2003	Mujeres	Murcia, Región de				19.6			4.9																													18.5	31.1	6.3
2002	Mujeres	Murcia, Región de				24			5																													17.6	33.4	5.7
2001	Mujeres	Murcia, Región de				20.7			4.6																													17.1	32.1	5.7									0.705872
2000	Mujeres	Murcia, Región de				27.5			3.8																													17.4	25.1	5.3
1999	Mujeres	Murcia, Región de				33.3			11.2
1991	Mujeres	Murcia, Región de
1992	Mujeres	Murcia, Región de
1993	Mujeres	Murcia, Región de
1994	Mujeres	Murcia, Región de
1995	Mujeres	Murcia, Región de
1996	Mujeres	Murcia, Región de
1997	Mujeres	Murcia, Región de
1998	Mujeres	Murcia, Región de
2014	Ambos sexos	Navarra, Comunidad Foral de	76.1	15.74
2013	Ambos sexos	Navarra, Comunidad Foral de	75.86	17.97	27.1	37.3	37.6	7	12.6	326.72			3.3	23.8	7.3	7.9	5.1		14.5																			12.4	48.4	13	45.5		1446	886	527	334	278	2.8
2012	Ambos sexos	Navarra, Comunidad Foral de	75.98	16.3	27.3	30.1	37.6	6	10.5	308.59			5.5	23.9	11.2	8	6.6	5.6	12	3.9	15.3	1503.17	15.05	53.63		6.92					0.77	0.73				0.05	571778	9.6	51	13.1	47.9		1398	1467	707	462	301	4.1
2011	Ambos sexos	Navarra, Comunidad Foral de	76.34	13.04	29.9	24.6	37.8	4.3	5.5	362.79	18100	31100	6.9	23	8.7	5	4.2	9.5	13.1	2.6	18.6	1574.64	13.97	55.29	16.72	6.92	2.35	4.47	76.27	69.73	0.77	0.72	218.332	50.051	577.512	0.06	650813	7.4	52.4	13.8	48.1	71.3	2614	1191	487	330	336	5.9	1.46974
2010	Ambos sexos	Navarra, Comunidad Foral de	75.77	11.94	26	22.4	38.2	3	3.6	411.98	18000	30700	7.8	18.5	9.6	5.1	6.8	5.9	13.8	4.2	19.4	1606.16	14.44	55.3	17.56	6.86	3.1	6.19	79.41	75.28	0.76	0.72	217.704	48.0207	445.883	0.06	680676	10.5	50.6	13.4	47.3	72.1	1574	1738	559	380	344	7.1
2009	Ambos sexos	Navarra, Comunidad Foral de	75.61	10.86	22.4	18.7	38.5	1.7	1.8	456.92	18300	30400	6.2	20.2	11.4	3.8	8.9	7.2	10.4	3.4	16.2	1633.59	14.08	54.35	18.68	7.19	2.39	4.66	73.85	66.85	0.75	0.71	213.046	47.6678	399.988	0.06	674723	13.4	48.9	13.1	49	72.1	2979	3894	586	410	300	5.2
2008	Ambos sexos	Navarra, Comunidad Foral de	75.93	6.88	19.7	13.2	38.4	0.8		422.91	18500	32400	7.1	20.3	10.9	3.1	7.2	6.1	8.8	2.8	15.9	1513.68	14.4	55.15	18.32	7.01	2.27	4.34	72.67	63.78	0.75	0.71	211.671	47.5114	414.987	0.06	654771	9.3	46.7	12.7	50.2	72.1	2983	5811	407	261	232	6.9
2007	Ambos sexos	Navarra, Comunidad Foral de	75.78	4.75	27.7	9.1	38.2	0.7		404.12	18000	32500	8.7	14.7	7.5	3.6	4.5	3.9	8.5	1.8	19.5	1399.86	13.83	54.67	19.36	6.82	2.22	4.35	72.49	62.83	0.77	0.7	226.7	48.2341	526.749	0.05	572854	6.9	53.2	13.5	50.4	76.2	1822	5636	196	84		7.1
2006	Ambos sexos	Navarra, Comunidad Foral de	75.55	5.41	27.7	10	38.3	0.7		370.26	16800	30700	5.4	15.3	7.6	5.2	6.9	8.5	15.3	3.8	17.9	1285.45	13.67	54.68	19.84	6.59	2.15	4.25	72.62	63.09	0.75	0.7	223.715	47.4445	579.633	0.05	532688	7.4	52.2	12.1	51.5	76.2	3006	5900	207	92		4.7
2005	Ambos sexos	Navarra, Comunidad Foral de				10.9	38.7	1			15900	28600	6.7	18.7	5.7	4.7	4.3	7.9	12.5	4.6	19.5	1204.47	14.2	54.75	19.95	6.71	2.13	4.1	73.05	64.4	0.74	0.69	213.188	47.7363	610.306	0.05	496927	8.4	48.3	12.4		76.2	2211	4577	209	85		5.5
2004	Ambos sexos	Navarra, Comunidad Foral de				10.2	39.5	1.1			15000	27200	2.9	21.2	5.4	3.4	4.8	9.3	15.1	7.4	16.7	1166.99	14.67	54.15	19.92		2.1	4.02	73.93	65.04	0.75	0.7	214.102	46.6344	531.702	0.06	484012	8.4	44.4	4		76.2	645	4820	163	63		3.1
2003	Ambos sexos	Navarra, Comunidad Foral de				11.1	39.1	1.2			14200	26100										1088.91	15.54	53.39	20.12		2.07	4.03	74.36	65.49			210.083	47.1148	392.565	0.06	452472	7.8	47.9	6.3		66.1	938	4386	132	65
2002	Ambos sexos	Navarra, Comunidad Foral de				7.3	39.2	1.3			13600	25700										1013.98	16.32	53.27	19.69		2.02	4	74.32	65.48			193.487	41.946	321.289	0.06	424089	7.8	50	6.7		66.1	1390	4425	109	61
2001	Ambos sexos	Navarra, Comunidad Foral de				7.7	39.4				13000	24200															1.99	4.04	74.32	65.28			184.233	42.4457	319.156	0.06	392007	6	46.2	6.5		66.1	1621	4867	79	39			1.13375
2000	Ambos sexos	Navarra, Comunidad Foral de				9.2	40.1	1.3			12300	23400															1.91	4.11	74.59	65.03			185.592	43.1651	376.465	0.06	371558	6.5	40.8	6		66.1	1744	3721	87
1999	Ambos sexos	Navarra, Comunidad Foral de				14.6	40	3.8	4.1																		1.83	3.94	76.81	66.6			180.124	43.3325	367.225	0.06	341013					73.5	1677	3391	78
1990	Ambos sexos	Navarra, Comunidad Foral de
1991	Ambos sexos	Navarra, Comunidad Foral de																																									732	2390
1992	Ambos sexos	Navarra, Comunidad Foral de																																		0.06	239742						801	2499
1993	Ambos sexos	Navarra, Comunidad Foral de																																		0.07	248239						2225	3272
1994	Ambos sexos	Navarra, Comunidad Foral de																																		0.06	250747					73.6	2242	2660
1995	Ambos sexos	Navarra, Comunidad Foral de																																		0.06	266146					73.6	2274	2767	92
1996	Ambos sexos	Navarra, Comunidad Foral de																									1.59	3.61	76.97	67.24						0.06	289585					73.5	2892	3126	80
1997	Ambos sexos	Navarra, Comunidad Foral de																									1.62	3.7	75.92	67.25			170.845	41.8282	309.901	0.06	307757					73.5	2387	3257	75
1998	Ambos sexos	Navarra, Comunidad Foral de																									1.69	3.75	75.14	66.29			174.71	42.8918	332.781	0.06	320885					73.5	2133	2674	80
1989	Ambos sexos	Navarra, Comunidad Foral de
1988	Ambos sexos	Navarra, Comunidad Foral de
1987	Ambos sexos	Navarra, Comunidad Foral de
1986	Ambos sexos	Navarra, Comunidad Foral de
1985	Ambos sexos	Navarra, Comunidad Foral de
1984	Ambos sexos	Navarra, Comunidad Foral de
1983	Ambos sexos	Navarra, Comunidad Foral de
1982	Ambos sexos	Navarra, Comunidad Foral de
1981	Ambos sexos	Navarra, Comunidad Foral de
1980	Ambos sexos	Navarra, Comunidad Foral de
1979	Ambos sexos	Navarra, Comunidad Foral de
1978	Ambos sexos	Navarra, Comunidad Foral de
1977	Ambos sexos	Navarra, Comunidad Foral de
1976	Ambos sexos	Navarra, Comunidad Foral de
1975	Ambos sexos	Navarra, Comunidad Foral de
2014	Hombres	Navarra, Comunidad Foral de	81.13	15.47
2013	Hombres	Navarra, Comunidad Foral de	81.44	17.15	23.2	37.3			13.1																													12.3	37.9	11.3	44
2012	Hombres	Navarra, Comunidad Foral de	81.14	16.85	24.9	30.9			9.3																	6.95												10.7	41.3	12	46
2011	Hombres	Navarra, Comunidad Foral de	81.6	12.63	25	24.8			5.3																	6.91												6.6	47.1	12	46.4								1.70921
2010	Hombres	Navarra, Comunidad Foral de	82.15	11.54	18.6	22.8			5.2																	7.1												10.7	41.4	11.4	47.4
2009	Hombres	Navarra, Comunidad Foral de	83.2	10.06	20.2	19.5																				7.23												11.9	43.8	12.4	49.1
2008	Hombres	Navarra, Comunidad Foral de	83.84	5.7	16	13.1																				6.9												7.7	41.4	12	49.7
2007	Hombres	Navarra, Comunidad Foral de	85.17	3.17	25.8	6.3																				6.94												6.3	49.2	12.2	47.5
2006	Hombres	Navarra, Comunidad Foral de	84.64	4.19	20.4	9.1																				6.56												7.3	52.3	11.1	49.8
2005	Hombres	Navarra, Comunidad Foral de				9.7																				6.8												8.2	43.8	10.9
2004	Hombres	Navarra, Comunidad Foral de				7.6																																8.5	37.3	3.8
2003	Hombres	Navarra, Comunidad Foral de				10																																6.4	40.6	5.8
2002	Hombres	Navarra, Comunidad Foral de																																				5.6	44.5	6.2
2001	Hombres	Navarra, Comunidad Foral de																																				4.1	36.9	5.6									1.23998
2000	Hombres	Navarra, Comunidad Foral de				6.5																																4.7	32.4	4.7
1999	Hombres	Navarra, Comunidad Foral de				9.5
1991	Hombres	Navarra, Comunidad Foral de
1992	Hombres	Navarra, Comunidad Foral de
1993	Hombres	Navarra, Comunidad Foral de
1994	Hombres	Navarra, Comunidad Foral de
1995	Hombres	Navarra, Comunidad Foral de
1996	Hombres	Navarra, Comunidad Foral de
1997	Hombres	Navarra, Comunidad Foral de
1998	Hombres	Navarra, Comunidad Foral de
2014	Mujeres	Navarra, Comunidad Foral de	70.9	16.06
2013	Mujeres	Navarra, Comunidad Foral de	70.06	18.96	31.5	37.3			12.1																													12.6	59.1	14.8	47
2012	Mujeres	Navarra, Comunidad Foral de	70.57	15.64	30.5	29.2			11.9																	6.9												8.4	61.1	14.2	49.8
2011	Mujeres	Navarra, Comunidad Foral de	70.8	13.54	35.3	24.3			5.7																	6.94												8.3	58.2	15.6	49.8								1.23278
2010	Mujeres	Navarra, Comunidad Foral de	69.01	12.44	34.6	22.1																				6.58												10.3	60.6	15.5	47.3
2009	Mujeres	Navarra, Comunidad Foral de	67.56	11.92	24.9	17.7																				7.15												15.1	54.3	13.9	49
2008	Mujeres	Navarra, Comunidad Foral de	67.51	8.44	23	13.4																				7.11												11	52.5	13.5	50.9
2007	Mujeres	Navarra, Comunidad Foral de	65.84	6.93	28.9	12.4																				6.7												7.6	57.5	14.8	53.3
2006	Mujeres	Navarra, Comunidad Foral de	65.96	7.06	33.5	11																				6.61												7.5	52.1	13.1	53.2
2005	Mujeres	Navarra, Comunidad Foral de				12.2																				6.64												8.7	53.2	14
2004	Mujeres	Navarra, Comunidad Foral de				13.4																																8.3	52.2	4.2
2003	Mujeres	Navarra, Comunidad Foral de				12.4																																9.3	55.8	6.8
2002	Mujeres	Navarra, Comunidad Foral de				10.2																																10.2	55.9	7.2
2001	Mujeres	Navarra, Comunidad Foral de				12																																8	56.4	7.5									1.02934
2000	Mujeres	Navarra, Comunidad Foral de				12.7																																8.3	49.9	7.4
1999	Mujeres	Navarra, Comunidad Foral de				21.4
1991	Mujeres	Navarra, Comunidad Foral de
1992	Mujeres	Navarra, Comunidad Foral de
1993	Mujeres	Navarra, Comunidad Foral de
1994	Mujeres	Navarra, Comunidad Foral de
1995	Mujeres	Navarra, Comunidad Foral de
1996	Mujeres	Navarra, Comunidad Foral de
1997	Mujeres	Navarra, Comunidad Foral de
1998	Mujeres	Navarra, Comunidad Foral de
2014	Ambos sexos	País Vasco	74.92	16.41
2013	Ambos sexos	País Vasco	74.79	16.66	34.3	33.8	36.9	8.1	12.6	443.08			5.4	24.2	10	13	11.4		16.8																			10	61.3	13.4	43.1		1772	3994	708	275	1838	4.9
2012	Ambos sexos	País Vasco	75.11	15.68	34.9	29.9	37	6.8	11	388.12			3.7	18.2	6.9	11	6.4	10	17.7	6.7	16.8	1591.53	14.73	57.01		6.76					0.78	0.71				0.25	2601814	11.8	60.8	13.8	43		3835	4757	801	336	2524	3.2
2011	Ambos sexos	País Vasco	75.63	12.42	34	25.6	37.2	5.3	8.4	448.45	18900	32500	4.4	19.7	8.7	9.7	6.4	10.4	18.9	5.4	17.4	1661.47	14.64	56.4	16.74	6.67	2.11	3.83	89.48	90.23	0.78	0.69	140.838	75.2915	420.124	0.25	2712632	10.9	60.6	13	44.4	69.2	5523	5851	779	393	2242	5.2	1.78865
2010	Ambos sexos	País Vasco	74.07	10.75	33.2	22.1	37.4	3.5	5.1	427.79	18900	32000	4	19.1	6.6	8.8	5.7	9	16.3	6.5	16.5	1687.53	14.79	55.21	17.73	6.86	2.03	3.87	91.2	89.96	0.62	0.56	137.932	73.8502	380.141	0.26	2777204	9.9	59.8	13.1	44.7	64	4991	6409	740	369	1963	3.3
2009	Ambos sexos	País Vasco	73.26	11.4	32.4	22.1	37.5	2.7	4.2	418.82	19300	31400	2.8	22.2	6	5.5	10.3	5.5	14.8	3.9	16.8	1692.06	14.81	54.73	18.01	6.74	1.71	2.94	90.71	85.42	0.61	0.57	135.356	71.6316	386.792	0.26	2814773	11.4	62.2	13.4	45.8	64	4672	8782	792	353	1297	2.5
2008	Ambos sexos	País Vasco	73.66	6.65	29.7	13.4	37.9	1.6	1.8	487.76	19400	33500	4.1	17.6	6	6.5	7.1	7.1	14.8	5.7	16.1	1579.69	14.63	54.24	18.74	6.72	1.63	2.66	90.86	84.47	0.69	0.59	133.293	71.0209	453.822	0.23	2600686	8.6	57.9	13.6	46.4	64	5000	9083	906	303	1209	3.5
2007	Ambos sexos	País Vasco	72.85	6.26	34.9	11.9	37.8	1.5	1.4	372.44	18200	33200	4.6	20.3	8.1	6.2	6.7	8.9	15.9	5.4	15.3	1440.2	14.41	53.52	19.46	6.48	1.54	2.62	90.77	84.86	0.64	0.57	130.379	69.0129	425.384	0.22	2351337	8.4	59.3	13.4	47	75	4751	10793	536	168		4.6
2006	Ambos sexos	País Vasco	73.21	7.21	39.3	14.6	37.9	2	2.3	368.29	17300	31100	5.6	18.2	6	6.4	5.1	7.2	13.7	3.8	15.3	1293.45	14	53.37	20.56	6.83	1.49	2.57	90.69	85.43	0.63	0.55	130.98	66.4104	410.64	0.21	2149551	7.9	56.1	12.7	47.6	75	4829	9794	516	130		5.3
2005	Ambos sexos	País Vasco				13.7	38	1.8	1.9		16100	28500	5.1	24.5	9.8	7.3	7.9	6.8	16.5	4.8	13.4	1218.44	13.92	52.87	21.01	6.51	1.44	2.51	91.49	85.91	0.63	0.55	127.926	64.3189	369.976	0.22	2020048	8.2	55.8	12.9		75	4025	11151	562	138		4.5
2004	Ambos sexos	País Vasco				18.5	38.3	3.9	4.8		15100	26900	3.7	19.2	7.4	7.8	5.2	7.6	15.5	4.6	14.8	1117.57	13.84	53.68	21.09		1.4	2.47	92.84	86.57	0.58	0.45	124.335	61.9767	377.91	0.22	1918419	9.8	50.8	6.8		75	3416	10417	547	130		4.2
2003	Ambos sexos	País Vasco				15.4	38.5	3.2	3.2		14200	25500										1048.41	13.96	53.38	21.22		1.37	2.46	93.53	87.46			119.87	60.2934	363.386	0.23	1842244	10.6	48.8	6.3		63.8	3896	7956	464	117
2002	Ambos sexos	País Vasco				16.4	38.5	3.8	3.8		13400	25100										976.35	14.18	53.8	20.43		1.33	2.45	92.86	87.41			117.116	59.5171	322.908	0.23	1749765	7.8	45.9	6.2		63.8	3054	14974	419	82
2001	Ambos sexos	País Vasco				15.2	38.8	4.4	4.2		12800	23600															1.32	2.4	92.86	87.44			114.363	56.7004	264.506	0.23	1632777	8.1	44.9	4.9		63.8	2365	14091	353	92			0.96016
2000	Ambos sexos	País Vasco				18.5	39	5.9	6.5		12000	22600															1.29	2.34	92.5	86.97			112.523	55.2244	244.386	0.23	1511450	8.1	44.6	4.9		63.8	1636	13260	395
1999	Ambos sexos	País Vasco				23.2	38.9	7.1	8.3																		1.23	2.32	91.18	87.77			107.005	52.9468	246.377	0.25	1491012					71.5	2065	11633	430
1990	Ambos sexos	País Vasco
1991	Ambos sexos	País Vasco																																									276	5908
1992	Ambos sexos	País Vasco																																		0.25	928480						491	4342
1993	Ambos sexos	País Vasco																																		0.27	1038830						1348	7348
1994	Ambos sexos	País Vasco																																		0.26	1061322					69.7	1552	4322
1995	Ambos sexos	País Vasco																																		0.25	1137082					69.7	1761	5724	441
1996	Ambos sexos	País Vasco																									1.2	2.31	93.67	88.42						0.25	1196257					71.5	2076	4321	464
1997	Ambos sexos	País Vasco																									1.2	2.31	93.35	88.4			96.6471	49.1434	315.068	0.25	1272522					71.5	1872	8799	460
1998	Ambos sexos	País Vasco																									1.22	2.31	93.77	88.2			102.614	50.655	297.798	0.24	1331135					71.5	2124	8555	400
1989	Ambos sexos	País Vasco
1988	Ambos sexos	País Vasco
1987	Ambos sexos	País Vasco
1986	Ambos sexos	País Vasco
1985	Ambos sexos	País Vasco
1984	Ambos sexos	País Vasco
1983	Ambos sexos	País Vasco
1982	Ambos sexos	País Vasco
1981	Ambos sexos	País Vasco
1980	Ambos sexos	País Vasco
1979	Ambos sexos	País Vasco
1978	Ambos sexos	País Vasco
1977	Ambos sexos	País Vasco
1976	Ambos sexos	País Vasco
1975	Ambos sexos	País Vasco
2014	Hombres	País Vasco	79.72	16.6
2013	Hombres	País Vasco	79.96	16.74	30.7	35.1			14.5																													12.2	55.7	12.5	40.5
2012	Hombres	País Vasco	80.33	15.63	33.1	30.6			11.5																	6.85												11.9	57	11.7	40
2011	Hombres	País Vasco	80.84	11.83	31.6	24.4			8.1																	6.68												10.5	59	11	40.7								2.04442
2010	Hombres	País Vasco	80.77	10.32	31	22.9			5.6																	6.89												9.5	55.7	11.3	41.5
2009	Hombres	País Vasco	80.14	11.16	29.9	23.7			5.1																	6.73												12	57.5	11.4	43.1
2008	Hombres	País Vasco	81.98	5.76	30.3	13.2			1.8																	6.85												7.4	53.7	12	42.8
2007	Hombres	País Vasco	81.54	5	32.8	11.1			1.1																	6.56												8.3	51.8	12.2	42.4
2006	Hombres	País Vasco	82.31	5.78	32.5	12.9			2																	7.03												8.6	50.4	11.4	44
2005	Hombres	País Vasco				13.4			1.8																	6.52												8.3	54.6	10.8
2004	Hombres	País Vasco				16			2.9																													10.2	50.3	5.3
2003	Hombres	País Vasco				12.7			2.3																													10.4	47	5.3
2002	Hombres	País Vasco				13.6			2.3																													7.7	46	5.2
2001	Hombres	País Vasco				11.6			3.5																													8.2	43.7	4.1									1.0298
2000	Hombres	País Vasco				15.8			4.3																													7.3	42.6	4.4
1999	Hombres	País Vasco				18.4			5.1
1991	Hombres	País Vasco
1992	Hombres	País Vasco
1993	Hombres	País Vasco
1994	Hombres	País Vasco
1995	Hombres	País Vasco
1996	Hombres	País Vasco
1997	Hombres	País Vasco
1998	Hombres	País Vasco
2014	Mujeres	País Vasco	70.14	16.19
2013	Mujeres	País Vasco	69.63	16.58	38.4	32.4			10.6																													7.7	67	14.3	45.5
2012	Mujeres	País Vasco	69.86	15.74	37.1	29.3			10.5																	6.68												11.7	64.7	15.9	46
2011	Mujeres	País Vasco	70.35	13.11	36.5	26.8			8.8																	6.67												11.4	62.3	15.1	47.8								1.54848
2010	Mujeres	País Vasco	67.27	11.27	35.7	21.3			4.6																	6.83												10.3	64.1	14.9	47.8
2009	Mujeres	País Vasco	66.27	11.7	35.3	20.3			3.1																	6.75												10.8	67.3	15.5	48.5
2008	Mujeres	País Vasco	65.19	7.79	29	13.6			1.8																	6.6												10	62.4	15.2	49.7
2007	Mujeres	País Vasco	64.02	7.88	36.5	12.8			1.6																	6.41												8.6	67.4	14.6	51.4
2006	Mujeres	País Vasco	63.97	9.08	45	16.7			2.7																	6.64												7.2	62.3	14	50.9
2005	Mujeres	País Vasco				14.1			2.1																	6.5												8.2	57.1	15
2004	Mujeres	País Vasco				21.4			7																													9.4	51.4	8.2
2003	Mujeres	País Vasco				18.5			4.3																													10.8	50.6	7.3
2002	Mujeres	País Vasco				19.8			5.6																													7.9	45.8	7.3
2001	Mujeres	País Vasco				19.6			5																													8.1	46.2	5.7									0.894206
2000	Mujeres	País Vasco				21.8			9.3																													9	46.6	5.4
1999	Mujeres	País Vasco				28.8			12.1
1991	Mujeres	País Vasco
1992	Mujeres	País Vasco
1993	Mujeres	País Vasco
1994	Mujeres	País Vasco
1995	Mujeres	País Vasco
1996	Mujeres	País Vasco
1997	Mujeres	País Vasco
1998	Mujeres	País Vasco
2014	Ambos sexos	Rioja, La	77.46	18.29
2013	Ambos sexos	Rioja, La	76	20.1	25.1	35.7	37.6	8.6	13.3	366.33			10.7	33.1	15	10.4	13.9		22.2																			15.5	42.4	12.5	51.4		269	495	313	201	240	8.4
2012	Ambos sexos	Rioja, La	76.06	20.68	23.4	37.1	37.7	8.1	12	335.71			10.8	30	14.5	10.4	14.4	18.7	22.6	10	9.5	1352.34	13.11	57.28		6.89					0.83	0.69				0.02	245771	16.6	43.4	11.5	51.1		410	785	392	257	246	7.9
2011	Ambos sexos	Rioja, La	76.41	17.35	19.3	31.5	38.5	6.9	8.8	368.99	15200	27200	10.2	27.1	14.5	13.1	8.8	23.3	26.1	13.5	11.4	1487.94	12.91	56.61	18.19	7.1	1.65	3.08	97.09	96.68	0.83	0.72	133.366	56.9286	383.788	0.02	253953	19.1	43.6	10.7	53.8	75.7	251	2147	407	263	244	6.9	1.06018
2010	Ambos sexos	Rioja, La	75.39	14.23	19	24.2	38.8	4.9	5.3	317.67	14900	26900	12.1	29.3	11.7	13.8	16.4	20.4	27.3	8.6	8.8	1516.94	13.1	55.07	19.2	7.1	1.63	2.98	96.3	94.78	0.88	0.73	129.793	54.5323	361.317	0.03	270382	14	48.7	11.3	54.8	79.3	519	2893	756	476	222	10.7
2009	Ambos sexos	Rioja, La	75.8	12.71	21.9	23.3	38.3	2.6	3.4	367.7	15300	26500	8.6	28.3	14.2	5.1	15.3	15.3	19.5	8.6	12.6	1514.99	14.05	55.22	19.33	6.97	1.71	3.03	96.67	95.09	0.83	0.65	129.898	51.7688	423.361	0.03	281376	19	44.5	10.4	53.2	79.3	964	4240	834	522	193	7
2008	Ambos sexos	Rioja, La	75.39	7.96	21.3	13.5	39.1	1.2		323.71	15500	28600	6.1	22.3	10.3	3.2	13.2	19.5	24	10.3	16	1548.71	14.11	57.14	18.5	6.93	1.76	3.44	97.47	96.29	0.83	0.65	132.273	50.0406	382.476	0.02	264238	18.2	38.7	9.7	55.9	79.3	724	6376	682	345	111	5.2
2007	Ambos sexos	Rioja, La	74.15	5.82	23.7	11.6	39.3	0.9		451.84	14500	28600	9.5	26.8	12	7.3	8.9	16.7	22.2	8.4	12.8	1883.52	14.49	55.56	19.2	6.98	1.67	3.12	97.68	96.89	0.78	0.73	130.091	49.836	377.653	0.02	247812	11.2	42.3	9.6	55.1	79.5	803	5208	426	141		6.4
2006	Ambos sexos	Rioja, La	74.81	6.16	18.3	11.5	39.2	1.1		310.1	14200	27000	4.2	19.5	7.1	5.9	9.8	17.8	24.9	9	12	1557.4	13.69	53.13	21.05	6.97	1.54	3	98.5	96.27	0.76	0.63	124.202	49.0878	285.632	0.02	218150	13.1	38.3	9.2	55	79.5	888	5434	410	123		3.4
2005	Ambos sexos	Rioja, La				11.7	39	1.5			13500	25000	3.9	22.6	8.7	4.3	5.1	19.9	23.6	11.2	10.6	1233.94	14.24	51.75	22.66	6.56	1.5	3.01	96.4	94.2	0.76	0.64	125.343	50.4059	324.95	0.02	201992	9.9	42.1	10.6		79.5	723	4415	449	105		2.7
2004	Ambos sexos	Rioja, La				8.9	39.8	1.6			13100	23900	4.9	32.3	13.4	4.6	6.7	13.8	19.3	8	10.6	1115.89	14.56	52.76	22.86		1.54	2.96	96.88	94.2	0.77	0.65	124.586	48.0496	274.569	0.02	187897	10.9	46.2	2.1		79.5	764	3620	402	101		5.2
2003	Ambos sexos	Rioja, La				10	39.6	1.7			12500	23200										997.86	14.17	54.2	23.52		1.44	2.88	96.11	99.15			125.513	45.928	268.907	0.02	176928	8.2	39.6	2.1		74.2	623	3275	336	85
2002	Ambos sexos	Rioja, La				12.4	40.3	2.4			12000	22600										913.32	13.02	48.78	23.49		1.4	2.88	100	99.38			127.069	45.4584	262.37	0.02	164160	9.3	40.4	2.3		74.2	467	4233	295	65
2001	Ambos sexos	Rioja, La				8	40.2				11600	21600															1.38	2.73	100	99.33			125.988	44.9176	292.147	0.02	153864	10	33	2.4		74.2	370	3077	298	58			0.9622
2000	Ambos sexos	Rioja, La				14.7	40.2	3.7	7.3		11100	21000															1.23	2.41	100	99.23			125.811	45.2772	284.653	0.02	149836	10.4	32.2	1.9		74.2	704	2393	283
1999	Ambos sexos	Rioja, La				13.1	40.5	3.7	7																		1.25	2.46	104.19	99.39			121.909	41.2615	250.195	0.02	129651					80.9	657	2004	248
1990	Ambos sexos	Rioja, La
1991	Ambos sexos	Rioja, La																																									272	1883
1992	Ambos sexos	Rioja, La																																									298	1863
1993	Ambos sexos	Rioja, La																																									385	1627
1994	Ambos sexos	Rioja, La																																								80	679	1080
1995	Ambos sexos	Rioja, La																																								80	651	1502	272
1996	Ambos sexos	Rioja, La																									1.13	2.14	98.99	98.93												80.9	811	1692	268
1997	Ambos sexos	Rioja, La																									1.2	2.46	100	99.23			123.17	43.5832	303.188							80.9	705	2334	266
1998	Ambos sexos	Rioja, La																									1.22	2.46	100	99.23			121.652	41.558	289.773							80.9	1287	1719	255
1989	Ambos sexos	Rioja, La
1988	Ambos sexos	Rioja, La
1987	Ambos sexos	Rioja, La
1986	Ambos sexos	Rioja, La
1985	Ambos sexos	Rioja, La
1984	Ambos sexos	Rioja, La
1983	Ambos sexos	Rioja, La
1982	Ambos sexos	Rioja, La
1981	Ambos sexos	Rioja, La
1980	Ambos sexos	Rioja, La
1979	Ambos sexos	Rioja, La
1978	Ambos sexos	Rioja, La
1977	Ambos sexos	Rioja, La
1976	Ambos sexos	Rioja, La
1975	Ambos sexos	Rioja, La
2014	Hombres	Rioja, La	82.49	15.79
2013	Hombres	Rioja, La	80.93	19.31	20.5	38.5			15.2																													16.1	41.4	12.2	51.3
2012	Hombres	Rioja, La	82.44	19.14	21.7	37.5			8.9																	6.84												15.1	39.7	9.8	51.8
2011	Hombres	Rioja, La	82.53	16.81	16.4	29.7			8.6																	7.28												15.3	39.7	9.2	54.4								1.21424
2010	Hombres	Rioja, La	83.38	12.91	14.8	22.1																				7.09												12.3	46	9.7	54
2009	Hombres	Rioja, La	84.05	12.71	18.1	26.1																				6.86												19.7	37.7	8.8	52.7
2008	Hombres	Rioja, La	84.53	6.51	16.5	12.2																				6.88												14.2	31.1	8.6	55.4
2007	Hombres	Rioja, La	84.85	4.09	24.5	9.4																				6.97												9.1	34.8	8.4	53.6
2006	Hombres	Rioja, La	84.7	5.16	11	10.5																				6.88												10.9	34.1	6.8	55
2005	Hombres	Rioja, La				6.4																				6.59												6.3	38.4	8.8
2004	Hombres	Rioja, La																																				7.4	41.8
2003	Hombres	Rioja, La																																					33	1.6
2002	Hombres	Rioja, La				11.3																																	36	2
2001	Hombres	Rioja, La																																				8	28.1	1.8									1.25186
2000	Hombres	Rioja, La																																				6.1	31.5
1999	Hombres	Rioja, La
1991	Hombres	Rioja, La
1992	Hombres	Rioja, La
1993	Hombres	Rioja, La
1994	Hombres	Rioja, La
1995	Hombres	Rioja, La
1996	Hombres	Rioja, La
1997	Hombres	Rioja, La
1998	Hombres	Rioja, La
2014	Mujeres	Rioja, La	72.3	21.22
2013	Mujeres	Rioja, La	70.9	21.05	30.1	32.9			11.5																													15	43.5	12.8	51.5
2012	Mujeres	Rioja, La	69.38	22.59	25.3	36.7			15.4																	6.95												18	47.5	13.3	50.5
2011	Mujeres	Rioja, La	69.94	18.01	22.8	33.4			9.1																	6.92												23.2	47.8	12.3	53.3								0.907038
2010	Mujeres	Rioja, La	66.87	15.99	23.5	26.8																				7.11												15.8	51.5	13	55.7
2009	Mujeres	Rioja, La	66.9	12.73	27	20																				7.09												18.2	52.1	12.1	53.7
2008	Mujeres	Rioja, La	65.43	9.99	25.7	14.9																				6.98												22.5	47.5	10.8	56.3
2007	Mujeres	Rioja, La	62.48	8.39	23.2	14.5																				7												13.4	50.9	11	56.6
2006	Mujeres	Rioja, La	64.05	7.6	25.4	12.8																				7.06												15.6	43.1	11.9	55.2
2005	Mujeres	Rioja, La				18.8																				6.53												13.8	46.4	12.6
2004	Mujeres	Rioja, La																																				14.7	51.3	3.2
2003	Mujeres	Rioja, La				14.2																																11.5	47	2.7
2002	Mujeres	Rioja, La																																				13.7	45.3	2.6
2001	Mujeres	Rioja, La																																				12.2	38.4	3									0.67531
2000	Mujeres	Rioja, La				27.2			16.2																													14.9	33	2.7
1999	Mujeres	Rioja, La				22.7
1991	Mujeres	Rioja, La
1992	Mujeres	Rioja, La
1993	Mujeres	Rioja, La
1994	Mujeres	Rioja, La
1995	Mujeres	Rioja, La
1996	Mujeres	Rioja, La
1997	Mujeres	Rioja, La
1998	Mujeres	Rioja, La
[truncated: 21 more columns]
