# Supplementary material
Source: Elsevier journal article supplement (https://www.sciencedirect.com/science/article/pii/S0213911116301388)
Supplement: mmc3 [file S0213911116301388:mmc3.xlsx]

## Sheet: INDICADORES
JUSTIFICACIÓN / FACTOR / DETERMINANTE (según Comisión para Reducir las Desigualdades en Salud en España, 2010)	DOCUMENTOS BASE DE IDENTIFICACIÓN	ÁMBITO TEMÁTICO	METADATO INDICADOR		METADATO INDICADOR				LOCALIZACIÓN				TEMPORALIDAD DISPONIBLE/PUBLICADA	SEGMENTACIÓN / ESTRATIFICACIÓN DISPONIBLE / PUBLICADA				SELECCIÓN INDICADOR
			ID	NOMBRE	DEFINICIÓN	CONSTRUCCIÓN / CÁLCULO / INTERPRETACIÓN	UNIDADES	OBSERVACIONES (precisión, cobertura, completitud, advertencias, problemas, pruebas específicas para comprobar el significado de los datos y la variación que muestran)	FUENTE PRIMARIA O PRINCIPAL	REFERENCIA/ENLACE WEB FUENTE PRIMARIA/BOOKMARK	FUENTE/S SECUNDARIA/S u OTRAS FUENTES	REFERENCIA/ENLACE WEB FUENTES SECUNDARIAS u OTRAS FUENTES		GEOGRÁFICA	GEOGRÁFICA Y SEXO	GEOGRÁFICA Y EDAD	OTRAS	Excluido (E)/ Incluido (I)/ No sabe (NS) / CONSTRUIR (C) / PEDIR (P) / SUSTITUIDO (S) / NO PROCEDE (NP)	MOTIVO	OBSERVACIONES
Determinantes estructurales de contexto socioeconómico y político relacionados con mercado de trabajo	PROPIA	EMPLEO	1	Paro registrado	Personas que tengan demandas pendientes de satisfacer el último día del mes en las Oficinas Públicas de Empleo, excepto las que se encuentren en determinadas situaciones (Orden Ministerial 1985).		ESCALA (números absolutos)	La implantación del sistema SISPE, a partir de mayo de 2005, ha tenido un gran impacto estadístico sobre su medición.	Anuario de Estadísticas. Ministerio Empleo	http://www.empleo.gob.es/es/estadisticas/contenidos/anuario.htm			2001-2013	Provincia	Solo España	Solo España	, , En http://www.ine.es/jaxi/tabla.do?path=/t22/a061/a1998/l0/&file=m10029.px&type=pcaxis&L=0 hay, por CCAA y 2004-2012, media anual y variación interanual (valor absoluto y porcentaje)	S	Se utilizaría la tasa de paro
	PROTOCOLO FIS		2	Tasa de actividad	En población mayor de 16 a 64 años (tb la hay en mayor de 16 años y por grupos de edad)	Cociente entre el número total de activos y la población total.	Porcentaje		Encuesta de población activa. INE.	http://www.ine.es/jaxiT3/Tabla.htm?t=4935	EPA resultados anuales por CCAA	http://www.ine.es/inebaseDYN/epa30308/epa_resultados_2.htm	2002-2014	CCAA	Sí	<25 años; >25; 16-19; 0-24; 25-54; >55 años	, Nacionalidad, Trimestres/periodos	I
	PROTOCOLO FIS y ARTÍCULO PÉREZ 2014 GACSAN		3	Tasa de paro	En población mayor de 16 a 64 años (tb la hay en mayor de 16 años y por grupos de edad)	Porcentaje de paro en la población activa obtenida como la media de los cuatro trimestres de cada año	Porcentaje		Encuesta de población activa. INE.	http://www.ine.es/jaxiT3/Tabla.htm?t=4967	EPA resultados anuales por CCAA	http://www.ine.es/inebaseDYN/epa30308/epa_resultados_2.htm	2002-2014	CCAA	Sí	<25 años; >25; 16-19; 0-24; 25-54; >55 años	Nivel de estudios (solo Clase social (SEE)0Nivel de estudios4TI y TII según CCAA ó Clase social (SEE)00Clase social (SEE)-Clase social (SEE)0Nivel de estudiosDificultad fin de mes para España), Nacionalidad, Ver en http://www.ine.es/dynt3/inebase/es/index.htm?padre=990&capsel=992	I
			191	Número de parados	En población mayor de 16 a 64 años (tb la hay en mayor de 16 años y por grupos de edad)	Personas paradas en la población activa obtenida como la media de los cuatro trimestres de cada año	ESCALA (miles)											C	LOCALIZAR PARA CONSTRUIR ID7
	ARTÍCULO PÉREZ 2014 GACSAN		4	Tasa de paro según estudios terminados en población 16-29 años			Porcentaje	Los datos de 2001 en adelante incorporan la nueva definición de parado establecida en el Reglamento 1897/2000 de la CE. Ruptura de serie en 2005 por cambio metodológico	Encuesta de población activa. INE.	http://www.ine.es/daco/daco42/sociales10/educa-naci.xls tabla 2	INEbase. Indicadores sociales. INE	Tabla extraída de http://www.ine.es/daco/daco42/sociales11/sociales.htm	1991-2009	España		16-19; 20-24; 25-29 años	, ,	P	No CCAA ni >2009	Gemma y Elena: preguntar al INE para obtener desagregación de CCAA y sexo y posterior a 2009
	PROPIA		5	Porcentaje de parados en población con estudios superiores (excepto doctorado)		Porcentaje de paro en la población activa obtenida como la media de los cuatro trimestres de cada año. Porcentajes respecto del total de cada comunidad	Porcentaje		Encuesta de población activa. INE.	http://www.ine.es/jaxiT3/Tabla.htm?t=4970	EPA resultados anuales por CCAA	http://www.ine.es/dynt3/inebase/index.htm?padre=817	2006-2013	CCAA	Sí		Datos tb según otros estudios alcanzados	I
	PROPIA		6	Tasa de paro en población joven (15-29 años)			Porcentaje		EUROSTAT	http://appsso.eurostat.ec.europa.eu/nui/show.do?query=BOOKMARK_DS-344517_QID_4FDA861E_UID_-3F171EB0&layout=TIME,C,X,0;GEO,L,Y,0;AGE,L,Z,0;UNIT,L,Z,1;SEX,L,Z,2;INDICATORS,C,Z,3;&zSelection=DS-344517AGE,Y15-29;DS-344517UNIT,PC;DS-344517INDICATORS,OBS_FLAG;DS-344517SEX,T;&rankName1=SEX_1_2_-1_2&rankName2=AGE_1_2_-1_2&rankName3=INDICATORS_1_2_-1_2&rankName4=UNIT_1_2_-1_2&rankName5=TIME_1_1_0_0&rankNa…			1999-2013	CCAA	Sí	15-24; 20-29; 15-19		I
	ARTÍCULO PÉREZ 2014 GACSAN		7	Tasa de cobertura de beneficiarios de prestaciones contributivas de desempleo		Proporción de perceptores de prestaciones contributivas de desempleo (media anual) sobre el total de parados detectados por la EPA (media de los cuatro trimestres)	Porcentaje	Los cambios metodológicos de la Encuesta de población activa en 2001 y 2005 influyen en el incremento de la tasa de cobertura al reducir "artificialmente" la cifra de personas paradas	Boletín de Estadísticas Laborales. Prestaciones por desempleo. Ministerio de empleo y Seguridad Social	http://www.empleo.gob.es/estadisticas/BEL/PRD/	Observatorio Social de España	http://barometrosocial.es/proteccion-social	1994-2012	España			, ,	C	Construir a partir de ID8 y ID191 (total de parados de la EPA (el ID3 es la tasa de paro, incluir otro indicador con nº parados), fijarse en el construido en http://barometrosocial.es/proteccion-social)	Los datos del INE no coinciden con los de empleo en http://www.empleo.gob.es/estadisticas/BEL/PRD/ (los del ID7), esto es debido a que que en el cuadro PRD-1 del BEL, se incluyen los beneficiarios del Subsidio para Trabajadores Eventuales Agrarios, y en los datos publicados en el INE, no se incluye a dichos beneficiarios.
	ARTÍCULO PÉREZ 2014 GACSAN		8	Número de beneficiarios de prestaciones por desempleo		Miles de beneficiarios, media anual	ESCALA (miles)	No incluyen a los Beneficiarios del Subsidio para Trabajadores Eventuales Agrarios	Boletín de Estadísticas Laborales. Prestaciones por desempleo (PRD-13). Ministerio de empleo y Seguridad Social	http://www.empleo.gob.es/estadisticas/BEL/PRD/	INE	http://www.ine.es/jaxi/tabla.do?path=/t25/a072/a01/l0/&file=c30045.px&type=pcaxis&L=0	2005-2014	CCAA			En el INE viene para España y sexo, según edad16-19; 20-24; 25-54; >55 años y clase de prestación (nivel contributivo, nivel asistencial, trabajadores eventuales agrarios)	C	Extraer los datos y trasponer para el análisis
			190	Tasa de parados sin cobertura		Total de parados sin prestaciones / total de parados según la EPA	Porcentaje		Abrir Gráfico 6.3 del indicador 6. Observatorio Social de España	http://barometrosocial.es/proteccion-social			1994-2014	España				C	A partir del ID191 y datos de parados sin prestaciones (buscar dato). Abrir Gráfico 6.3 del indicador 6 para comprobar cálculo
	ARTÍCULO PÉREZ 2014 GACSAN		9	Brecha de género en tasa de actividad		Diferencia proporcional de la tasa de actividad de las mujeres (M) en relación a la tasa media de ambos sexos que se encuentran en esa misma situación (Media): (M-Media)*100/Media. La población de referencia es de 16-64 años.	ESCALA (número)	Los cambios metodológicos de la Encuesta de población activa en 2001 y 2005 influyen en el incremento de la tasa de cobertura al reducir "artificialmente" la cifra de personas paradas (redujeron la tasa de paro en un 20% y un 4% respectivamente)	Encuesta de población activa. INE.	http://www.ine.es/jaxiT3/Tabla.htm?t=4935	Observatorio Social de España	http://barometrosocial.es/genero	1994-2014	CCAA			, ,	C	Calcular la proporción (brecha)
	ARTÍCULO PÉREZ 2014 GACSAN		10	Ganancia media anual por trabajador			Euros		Encuesta anual de estructura salarial. INE.	http://www.ine.es/jaxi/menu.do?type=pcaxis&path=/t22/p133/cno11/serie/&file=pcaxis			2008-2012	CCAA	Sí	Sí	, Nacionalidad, sector de actividad, tipo de jornada y tipo de contrato, ocupación, percentiles 10 y 90, cuartiles	C	Hay que construir datos <2008	2004-2006 en http://www.ine.es/jaxi/menu.do?type=pcaxis&path=/t22/p133/2004-2007/&file=pcaxis
	PROPIA		11	Desigualdad salarial		Se obtiene dividiendo el salario medio de quienes ganan por encima de cinco veces el Salario Mínimo Interprofesional (SMI) y el de quienes ganan por debajo del SMI en cómputo anual.	Porcentaje	Se incluyen todos los trabajadores por cuenta ajena cuyas percepciones, dinerarias o en especie, han sido satisfechas por la persona o entidad declarante en concepto de rendimientos del trabajo. El País Vasco y Navarra no se recogen en esta estadística, de la que no se publicaron datos en 1997 y 1998. Esta estadística no incluye el empleo sumergido pero tiene la ventaja de recoger a todas las per…	Estadística del MERCADO DE TRABAJO Y PENSIONES EN LAS FUENTES TRIBUTARIAS. Agencia Tributaria	http://www.agenciatributaria.es/AEAT.internet/datosabiertos/catalogo/hacienda/Mercado_de_Trabajo_y_Pensiones_en_las_Fuentes_Tributarias.shtml	Barómetro social de España	http://barometrosocial.es/archivos/1132	1992-2013	España, CCAA, Provincia	Sí	Sí	Sexo*edad*Nacionalidad (española, extranjera) Sexo*tramo de SMI Sexo*Sector	C	Hay que construirlo a partir de los tramos de SMI. Los informes son anuales, por lo que hay que construir la serie. Además las tablas de las variables de segmentación son independientes por lo que tb hay que fusionarlas manualmente
	PROPIA		12	Salario medio anual		Euros constantes con base 2013	Euros		Estadística del MERCADO DE TRABAJO Y PENSIONES EN LAS FUENTES TRIBUTARIAS. Agencia Tributaria	http://www.agenciatributaria.es/AEAT.internet/datosabiertos/catalogo/hacienda/Mercado_de_Trabajo_y_Pensiones_en_las_Fuentes_Tributarias.shtml	Barómetro social de España	http://barometrosocial.es/archivos/1132	1992-2013	España, CCAA, Provincia	Sí	Sí	Sexo*edad*Nacionalidad (española, extranjera) Sexo*tramo de SMI Sexo*Sector	C	Los informes son anuales, por lo que hay que construir la serie. Además las tablas de las variables de segmentación son independientes por lo que tb hay que fusionarlas manualmente
	ARTÍCULO PÉREZ 2014 GACSAN		13	Salario mínimo interprofesional	La cuantía retributiva mínima que percibirá el trabajador referida a la jornada legal de trabajo en cualquier actividad de la agricultura, industria o servicios, sin distinción de sexo u edad de los trabajadores, sean fijos, eventuales o temporeros, o sean personal al servicio del hogar familiar.	El salario mínimo interprofesional se fija anualmente por el Gobierno, mediante Real Decreto, previa consulta con las organizaciones sindicales y asociaciones empresariales más representativas, teniendo en cuenta el índice de precios al consumo, la productividad media nacional alcanzada, el incremento de la participación del trabajo en la renta nacional y la coyuntura económica general. La cuantí…	Euros		Ministerio de Empleo y Seguridad Social	http://www.empleo.gob.es/es/informacion/smi/contenidos/evolucion.htm			2007-2014	España			, ,	NP	Fijado por Gobierno
Determinantes intermedios de recursos materiales relacionados con condiciones de empleo y de trabajo	PROTOCOLO FIS y ARTÍCULO PÉREZ 2014 GACSAN		14	Tasa de temporalidad		Cociente entre el número de asalariados con contrato temporal y el número total de asalariados, utilizando la media de los cuatro trimestres de cada año	Porcentaje	Los cambios metodológicos introducidos en la Encuesta de población activa en 2001 y 2005 apenas influyen en este indicador	Encuesta de población activa. INE.	http://www.ine.es/jaxiT3/Tabla.htm?t=4241			2002-2014	CCAA	Sí		, , Trimestres. También según edad y tipo de contrato pero sin resultados por CCAA y con serie 2005-2012	C	Calcular la media de los 4 trimestres
	PROPIA		15	Horas semanales de trabajo	Nº medio de horas semanales de trabajo usual en empleo principal		ESCALA (número)		EUROSTAT	http://appsso.eurostat.ec.europa.eu/nui/show.do?query=BOOKMARK_DS-102273_QID_-174D9DA3_UID_-3F171EB0&layout=TIME,C,X,0;GEO,L,Y,0;UNIT,L,Z,0;INDICATORS,C,Z,1;&zSelection=DS-102273INDICATORS,OBS_FLAG;DS-102273UNIT,HR;&rankName1=UNIT_1_2_-1_2&rankName2=INDICATORS_1_2_-1_2&rankName3=TIME_1_0_0_0&rankName4=GEO_1_2_0_1&sortC=ASC_-1_FIRST&rStp=&cStp=&rDCh=&cDCh=&rDM=true&cDM=true&footnes=false&empty=fal…			1999-2013	CCAA				I
	Amaia y Unai		16	Carga Global del trabajo	Duración media diaria dedicada tanto a actividades remuneradas como no remuneradas (trabajo doméstico y cuidados, y trabajo voluntario).	Las categorías a incluir serían: Cuidados personales; Trabajo remunerado; Hogar y familia; Trabajo voluntario y reuniones; Las categorías a excluir serían: Estudios; Vida social y diversión; Deportes y actividades al aire libre; Aficiones e informática; Medios de comunicación; Trayectos y empleo del tiempo no especificado	ESCALA (horas)	Se podría obtener también la carga remunerada y no remunerada del trabajo ¿Debería recoger también estudios y desplazamientos al trabajo?	Encuesta de Empleo del Tiempo. INE	http://www.ine.es/jaxi/menu.do?type=pcaxis&path=%2Ft25/e447&file=inebase&L=0			2003/04, 2009/10	CCAA	Sí	Sí		C	Aunque no se dispone exactamente de la serie necesaria, se incluiría. Hay que calcular tiempo medio para 2009/10 (horas y minutos) aunque a partir de pc-axis; en 2003/04 son ficheros Excel independientes para cada CCAA (hojas A1R), y es tiempo medio en formato hora. Comprobar si se puede obtener a partir de la EPA	2009/10 en http://www.ine.es/jaxi/tabla.do?path=/t25/e447/a2009-2010/p07/l0/&file=7.2a.px&type=pcaxis&L=0 Y 2010 en http://www.ine.es/daco/daco42/empleo/dacoeet.htm
	PROPIA		17	Tasa de paro según tiempo de búsqueda de empleo			Porcentaje		Encuesta de población activa. Resultados anuales por CCAA. INE.	http://www.ine.es/jaxiT3/Tabla.htm?t=4972			2006-2013	CCAA	Sí		Según tiempo de búsqueda de empleo (<1 mes, 1-3, 3-6, 6-1 año, 1-2 años, >2 años)	S	Sustuido por de larga duración en la población activa (ID19)
	PROPIA		18	Porcentaje de parados de larga duración en el desempleo total	Parados que llevan doce meses como mínimo buscando empleo y no han trabajado en ese período, como porcentaje del total de desempleo		Porcentaje		Encuesta de población activa. Resultados anuales por CCAA. INE.	http://www.ine.es/jaxiT3/Tabla.htm?t=4972	EUROSTAT (sin sexo y con resultados diferentes)	http://appsso.eurostat.ec.europa.eu/nui/show.do?query=BOOKMARK_DS-102296_QID_277F948_UID_-3F171EB0&layout=TIME,C,X,0;GEO,L,Y,0;UNIT,L,Z,0;INDICATORS,C,Z,1;&zSelection=DS-102296UNIT,LTU_UNE_RS;DS-102296INDICATORS,OBS_FLAG;&rankName1=INDICATORS_1_2_-1_2&rankName2=UNIT_1_2_-1_2&rankName3=TIME_1_0_0_0&rankName4=GEO_1_2_0_1&sortC=ASC_-1_FIRST&rStp=&cStp=&rDCh=&cDCh=&rDM=true&cDM=true&footnes=false&emp…	2006-2013	CCAA	Sí		Sumar porcentajes de 1-2 años y >2 años	S	Sustuido por en la población activa (ID19)	Para <2005 en http://www.ine.es/inebaseDYN/epa30308_p2001/epa_series_anteriores2005.htm (viene año a año y según sexo)
	PROTOCOLO FIS		19	Porcentaje de parados de larga duración en la población activa	Parados que llevan doce meses como mínimo buscando empleo y no han trabajado en ese período, como porcentaje de la población activa total (ocupados más no ocupados)		Porcentaje		EUROSTAT	http://appsso.eurostat.ec.europa.eu/nui/show.do?query=BOOKMARK_DS-102296_QID_-6DD30465_UID_-3F171EB0&layout=TIME,C,X,0;GEO,L,Y,0;UNIT,L,Z,0;INDICATORS,C,Z,1;&zSelection=DS-102296UNIT,LTU_UNE_RT;DS-102296INDICATORS,OBS_FLAG;&rankName1=UNIT_1_2_-1_2&rankName2=INDICATORS_1_2_-1_2&rankName3=TIME_1_0_0_0&rankName4=GEO_1_2_0_1&sortC=ASC_-1_FIRST&rStp=&cStp=&rDCh=&cDCh=&rDM=true&cDM=true&footnes=false&e…			1999-2013	Países, CCAA				I
	PROPIA		20	Tasa de paro de larga duración en población joven	Población de 15-29 años		Porcentaje		EUROSTAT	http://appsso.eurostat.ec.europa.eu/nui/show.do?query=BOOKMARK_DS-344571_QID_4DAB76E3_UID_-3F171EB0&layout=TIME,C,X,0;GEO,L,Y,0;UNIT,L,Z,0;SEX,L,Z,1;AGE,L,Z,2;INDICATORS,C,Z,3;&zSelection=DS-344571INDICATORS,OBS_FLAG;DS-344571SEX,T;DS-344571AGE,Y15-29;DS-344571UNIT,PC;&rankName1=UNIT_1_2_-1_2&rankName2=AGE_1_2_-1_2&rankName3=INDICATORS_1_2_-1_2&rankName4=SEX_1_2_-1_2&rankName5=TIME_1_0_0_0&rankNa…			1999-2013	CCAA	Sí			I
Determinantes intermedios de factores psicosociales relacionados con estrés	ARTÍCULO PÉREZ 2014 GACSAN		21	Probabilidad de perder el empleo actual	Proporción de personas empleadas que refieren como muy o bastante probable que pierdan su empleo actual en los próximos doce meses		Porcentaje	La encuesta no tiene muestra suficiente en algunas CCAA como para proporcionar datos fiables	Búsqueda avanzada de estudios. CIS	http://www.analisis.cis.es/cisdb.jsp	Barómetros del CIS	http://www.cis.es/cis/opencm/ES/11_barometros/index.jsp	1995-2014	España,CCAA			, ,	C	En la Serie J.1.05.07.008 aparecen el código de variables para cada encuesta en la que se introdujo. Para construir hay que seguir los pasos del ID160
	PROPIA		184	Grado de preocupación por perde el empleo	Proporción de personas que refieren estar muy preocupadas o preocupadas de quedarse sin trabajo o de estar desempleado/a en los próximos doce meses		Porcentaje	La encuesta no tiene muestra suficiente en algunas CCAA como para proporcionar datos fiables	Búsqueda avanzada de estudios. CIS	http://www.analisis.cis.es/cisdb.jsp			2004-2013	España,CCAA				C	En la Serie J.1.05.07.010 aparecen el código de variables para cada encuesta en la que se introdujo. Para construir hay que seguir los pasos del ID160
	ARTÍCULO PÉREZ 2014 GACSAN		22	Probabilidad de encontrar trabajo	Proporción de personas desempleadas que refieren como poco o nada probable que encuentren trabajo en los próximos doce meses		Porcentaje	La encuesta no tiene muestra suficiente en algunas CCAA como para proporcionar datos fiables	Búsqueda avanzada de estudios. CIS	http://www.analisis.cis.es/cisdb.jsp	Barómetros del CIS	http://www.cis.es/cis/opencm/ES/11_barometros/index.jsp	2010-2014	España,CCAA			, ,	E	No serie necesaria (Serie J.1.05.07.015)
Determinantes estructurales de contexto socioeconómico y político relacionados con políticas macroeconómicas	PROPIA	ECONOMÍA Y GARANTÍA INGRESOS	23	Gasto medio anual en consumo por persona			Euros	Utiliza en la encuesta la base de 2006 y el censo de 2011. Disponible tb para gasto total, gasto medio por hogar, índice de la media del gasto medio por persona y gasto medio por unidad de consumo	Encuesta de Presupuestos Familiares. Gasto anual de los hogares: resultados por CCAA. Censo 2011. INE	http://www.ine.es/jaxiBD/tabla.do?per=12&type=db&divi=EPF&idtab=477	Encuesta de Presupuestos Familiares. INE	http://www.ine.es/jaxiBD/menu.do?divi=EPF&per=01&type=db&his=9	2006-2013	CCAA			Datos tb de gasto total, gasto medio por hogar, índice de la media del gasto medio por persona o gasto medio por unidad de consumo	S	Se utiliza gasto medio anual en salud por persona
	PROPIA		24	Gasto medio anual en consumo por persona en sustentadores principales del hogar entre 16 y 45 años			Euros	Utiliza en la encuesta la base de 2006 y el censo de 2011. Disponible tb para gasto total, distribución porcentual, gasto medio por hogar, índice de la media del gasto medio por persona y gasto medio por unidad de consumo. Tb para otros grupos de edad (45-64 y >=65 años)	Encuesta de Presupuestos Familiares. Gasto anual de los hogares: resultados por CCAA. Censo 2011. INE	http://www.ine.es/jaxiBD/tabla.do?per=12&type=db&divi=EPF&idtab=489	Encuesta de Presupuestos Familiares. INE	http://www.ine.es/jaxiBD/menu.do?divi=EPF&per=01&type=db&his=9	2006-2013	CCAA		Tb para 45-64 y >=65 años	Tb para otras variables de segmentación como nivel de formación, situación actividad, situación profesional, ocupación, composición del hogar, tipo de hogar, fuente principal de ingresos y nivel de ingresos. ¿Utilizar mejor gasto total, distribución porcentual, gasto medio por hogar, índice de la media del gasto medio por persona o gasto medio por unidad de consumo?	S	Se utiliza gasto medio anual en salud por persona
	PROPIA		25	Gasto medio anual en salud por persona			Euros	Utiliza en la encuesta la base de 2006 y el censo de 2011. Disponible tb para gasto total y gasto medio por hogar.	Encuesta de Presupuestos Familiares. Gasto anual de los hogares: resultados por CCAA. Censo 2011. INE	http://www.ine.es/jaxiBD/tabla.do?per=12&type=db&divi=EPF&idtab=482	Encuesta de Presupuestos Familiares. INE	http://www.ine.es/jaxiBD/menu.do?divi=EPF&per=01&type=db&his=9	2006-2013	CCAA			Tb para otros grupos de gasto (2 dígitos) como alimentos y bebidad no alcohólicas; bebidas alcohólicas, tabaco y narcóticos; vivienda, agua, electricidad, gas y otros combustibles; enseñanza... Tb los gastos se deglosan en 3 y 4 dígitos, teniendo mayor detalle en el gasto (pe electricidad, gas, recogida basura, protección social, pescado, azúcar, alquileres, etc...) aunque menor precisión e inclu…	I
	PROTOCOLO FIS y ARTÍCULO PÉREZ 2014 GACSAN		26	Renta disponible bruta de los hogares per Cápita			Euros	Bases 2008 (serie 2008-11), 2000 (serie 2000-08)	Contabilidad regional. INE. Cuentas de renta de hogares. Principales resultados	http://www.ine.es/jaxi/menu.do?type=pcaxis&path=%2Ft35%2Fp010&file=inebase&L=			2000-2011	CCAA			Provincia (serie 2008-11)	S	Se utiliza ingresos netos	Cuidado, los resultados que ofrece el INE en un mismo epígrafe, suelen ser distintos para el fichero Excel que para PC-AXIS.
	PROPIA		27	Saldo neto de ingresos principales de los hogares per cápita			Euros	Bases 2008 (serie 2008-11), 2000 (serie 2000-08)	EUROSTAT	http://appsso.eurostat.ec.europa.eu/nui/show.do?query=BOOKMARK_DS-101589_QID_-58A2F5E6_UID_-3F171EB0&layout=TIME,C,X,0;GEO,L,Y,0;INDIC_NA,L,Z,0;UNIT,L,Z,1;INDICATORS,C,Z,2;&zSelection=DS-101589INDIC_NA,B5N_U;DS-101589UNIT,EUR_HAB;DS-101589INDICATORS,OBS_FLAG;&rankName1=INDIC-NA_1_2_-1_2&rankName2=INDICATORS_1_2_-1_2&rankName3=UNIT_1_2_-1_2&rankName4=TIME_1_0_0_0&rankName5=GEO_1_2_0_1&pprRK=FIRST&…			2000-2011	Países, CCAA				S	Se utiliza ingresos netos
	PROPIA		28	Ingresos disponibles netos de los hogares per cápita			Euros		EUROSTAT	http://appsso.eurostat.ec.europa.eu/nui/show.do?query=BOOKMARK_DS-101589_QID_-76093020_UID_-3F171EB0&layout=TIME,C,X,0;GEO,L,Y,0;INDIC_NA,L,Z,0;UNIT,L,Z,1;INDICATORS,C,Z,2;&zSelection=DS-101589INDIC_NA,B6N_U;DS-101589UNIT,EUR_HAB;DS-101589INDICATORS,OBS_FLAG;&rankName1=UNIT_1_2_-1_2&rankName2=INDICATORS_1_2_-1_2&rankName3=INDIC-NA_1_2_-1_2&rankName4=TIME_1_0_0_0&rankName5=GEO_1_2_0_1&sortC=ASC_-1…			2000-2011	Países, CCAA				I	¿Qué diferencia hay con respecto al del saldo neto?
	PROPIA		29	PIB en Poder Adquisitivo Estándar per cápita	Unidad monetaria ficticia que elimina las diferencias del poder adquisitivo, por ejemplo diferentes niveles de precios, entre países	El cálculo del PIB en PAE se intenta para permitir la comparación de niveles de actividad económica de economías de diferentes tamaños idenpendiientemente de sus niveles de precios. Es menos ajustado para comparaciones a lo largo del tiempo.	ESCALA (importe en moneda ficticia)		EUROSTAT	http://appsso.eurostat.ec.europa.eu/nui/show.do?query=BOOKMARK_DS-101610_QID_-5D18AFB2_UID_-3F171EB0&layout=TIME,C,X,0;GEO,L,Y,0;UNIT,L,Z,0;INDICATORS,C,Z,1;&zSelection=DS-101610UNIT,PPS_HAB;DS-101610INDICATORS,OBS_FLAG;&rankName1=UNIT_1_2_-1_2&rankName2=INDICATORS_1_2_-1_2&rankName3=TIME_1_0_0_0&rankName4=GEO_1_2_0_1&pprRK=FIRST&pprSO=PROTOCOL&sortC=ASC_-1_FIRST&rStp=&cStp=&rDCh=&cDCh=&rDM=true&…			2000-2011	Países, CCAA				I	¿2012?	También disponible en las unidades de Euro por habitante y Millones de €
	PROTOCOLO FIS		30	PIB a precios de mercado			ESCALA (importe en miles de euros)	Disponibilidad de otras series desde 1980 hasta 2010, con bases de 1985, 1995 y 2000	Contabilidad Regional de España. Serie homogénea en base 2008. Resultados detallados. INE	http://www.ine.es/jaxi/menu.do?type=pcaxis&path=%2Ft35/p010&file=inebase&L=0	EUROSTAT	http://appsso.eurostat.ec.europa.eu/nui/show.do?query=BOOKMARK_DS-101610_QID_-327306A4_UID_-3F171EB0&layout=TIME,C,X,0;GEO,L,Y,0;UNIT,L,Z,0;INDICATORS,C,Z,1;&zSelection=DS-101610INDICATORS,OBS_FLAG;DS-101610UNIT,MIO_EUR;&rankName1=INDICATORS_1_2_-1_2&rankName2=UNIT_1_2_-1_2&rankName3=TIME_1_0_0_0&rankName4=GEO_1_2_0_1&sortC=ASC_-1_FIRST&rStp=&cStp=&rDCh=&cDCh=&rDM=true&cDM=true&footnes=false&empt…	2000-2013	Países (2000-2011), CCAA, provincia (2000-2011)			En Eurostat está la serie 2000-2011, aunque el INE da el valor exacto	S	Se utilizaría PIB en PAE
	ARTÍCULO PÉREZ 2014 GACSAN		31	PIB a precios de mercado, per cápita	valor de la producción obtenida por los factores productivos dentro del país		ESCALA (importe en euros)	Series desde 1980 hasta 2013, con bases de 1985, 1995, 2000 y 2008	Contabilidad regional. INE	http://www.ine.es/daco/daco42/cre00/b2008/c14m_cre.xls	EUROSTAT	http://appsso.eurostat.ec.europa.eu/nui/show.do?query=BOOKMARK_DS-101610_QID_5AA1B536_UID_-3F171EB0&layout=TIME,C,X,0;GEO,L,Y,0;UNIT,L,Z,0;INDICATORS,C,Z,1;&zSelection=DS-101610INDICATORS,OBS_FLAG;DS-101610UNIT,EUR_HAB;&rankName1=INDICATORS_1_2_-1_2&rankName2=UNIT_1_2_-1_2&rankName3=TIME_1_0_0_0&rankName4=GEO_1_2_0_1&pprRK=FIRST&pprSO=PROTOCOL&ppcRK=FIRST&ppcSO=ASC&sortC=ASC_-1_FIRST&rStp=&cStp=&…	2008-2013	Países (2000-2011), CCAA			En Eurostat está la serie 2000-2011, aunque el INE da el valor exacto	S	Se utilizaría PIB en PAE
	PROPIA		32	Comercio electrónico	Personas que han comprado a través de Internet en los últimos 3 meses		Porcentaje		Encuesta sobre Equipamiento y Uso de Tecnologías de Información y Comunicación en los hogares 2014. Evolución por CCAA y tipo de uso. INE	http://www.ine.es/jaxi/tabla.do?path=/t25/p450/base_2011/a2014/l0/&file=06002.px&type=pcaxis&L=0	Encuesta sobre Equipamiento y Uso de Tecnologías de Información y Comunicación en los hogares. INE	http://www.ine.es/jaxi/menu.do?type=pcaxis&path=%2Ft25/p450&file=inebase&L=0	2006-2014	CCAA				NP	No útil
Determinantes intermedios de recursos materiales relacionados con ingresos y situación económica	ARTÍCULO PÉREZ 2014 GACSAN		33	Retrasos en pagos de vivienda principal	Porcentaje de personas que han tenido retrasos en el pago de gastos relacionados con la vivienda principal (hipoteca o alquiler, recibos de gas, comunidad...) en los últimos 12 meses		Porcentaje		Encuesta de condiciones de vida. INE	http://www.ine.es/jaxi/tabla.do?path=/t25/p453/provi/l0/&file=01003.px&type=pcaxis&L=0			2004-2013	CCAA			, , Personas/hogares	I		Para datos <2002 está la el Panel de Hogares de la UE en http://www.ine.es/jaxi/menu.do?type=pcaxis&path=/t25/p442&file=inebase 2013 es provisional
			34	Incapacidad para afrontar gastos imprevistos	Porcentaje de personas que no tienen capacidad para afrontar gastos imprevistos		Porcentaje		Encuesta de condiciones de vida. INE	http://www.ine.es/jaxi/tabla.do?path=/t25/p453/provi/l0/&file=01003.px&type=pcaxis&L=0			2004-2013	CCAA			, , Personas/hogares	I		Para datos <2002 está la el Panel de Hogares de la UE en http://www.ine.es/jaxi/menu.do?type=pcaxis&path=/t25/p442&file=inebase
	PROPIA		35	Carencia material (hogares)	Porcentaje de hogares con carencia en al menos 3 conceptos de una lista de 7: vacaciones una semana al año; comida de carne, pollo o pescado cada dos días; vivienda con temperatura adecuada; afrontar gastos imprevistos; retrasos en gastos de vivienda principal en los últimos 12 meses (hipoteca o alquiler, recibos de gas, comunidad...); automóvil; ordenador personal		Porcentaje		Encuesta de condiciones de vida. INE	http://www.ine.es/jaxi/tabla.do?path=/t25/p453/provi/l0/&file=01003.px&type=pcaxis&L=0	EUROSTAT	http://appsso.eurostat.ec.europa.eu/nui/show.do?query=BOOKMARK_DS-127827_QID_-5312ADD8_UID_-3F171EB0&layout=TIME,C,X,0;GEO,L,Y,0;UNIT,L,Z,0;INDICATORS,C,Z,1;&zSelection=DS-127827UNIT,PC_POP;DS-127827INDICATORS,OBS_FLAG;&rankName1=INDICATORS_1_2_-1_2&rankName2=UNIT_1_2_-1_2&rankName3=TIME_1_0_0_0&rankName4=GEO_1_2_0_1&sortC=ASC_-1_FIRST&rStp=&cStp=&rDCh=&cDCh=&rDM=true&cDM=true&footnes=false&empty…	2004-2013	CCAA			Tb datos de porcentajes de personas y para 3 de las 7 carencias ('retrasos en el pago de gastos relacionados con la vivienda principal', 'no poder permitirse vacaciones' y 'no poder afrontar gastos imprevistos') EUROSTAT ofrece tb IC95%	I		Para datos <2002 está la el Panel de Hogares de la UE en http://www.ine.es/jaxi/menu.do?type=pcaxis&path=/t25/p442&file=inebase
	PROPIA		36	Población con muy baja intensidad laboral	Personas menores de 60 años que viven en hogares donde sus miembros en edad laboral trabajaron menos del 20% de su potencial durante el último año		Porcentaje		EU-SILC. EUROSTAT	http://appsso.eurostat.ec.europa.eu/nui/show.do?query=BOOKMARK_DS-174802_QID_-7E00D21C_UID_-3F171EB0&layout=TIME,C,X,0;GEO,L,Y,0;UNIT,L,Z,0;INDICATORS,C,Z,1;&zSelection=DS-174802INDICATORS,OBS_FLAG;DS-174802UNIT,PC_Y_LT60;&rankName1=UNIT_1_2_-1_2&rankName2=INDICATORS_1_2_-1_2&rankName3=TIME_1_0_0_0&rankName4=GEO_1_2_0_1&sortC=ASC_-1_FIRST&rStp=&cStp=&rDCh=&cDCh=&rDM=true&cDM=true&footnes=false&em…			2004-2013	CCAA				I
Determinantes estructurales de contexto socioeconómico y político relacionados con desigualdad de renta y pobreza.	ARTÍCULO PÉREZ 2014 GACSAN		37	Percentil 80/20		establece una relación entre el 20% de la población que más ingresa y el 20% de la que menos ingresa. Los valores más altos indican mayor desigualdad	ESCALA (número)		Panel de Hogares de Europa (2000) y Encuesta de condiciones de vida (>2004). INE	http://www.ine.es/jaxiBD/tabla.do?per=12&type=db&divi=ECV&idtab=23			2000-2012	España	Sí		, ,	S	Para >=2004 se utilizaría el de alquiler imputado (ID38) ya que el Panel de Hogares de la UE de 2000 no lo incluye en la definición de la renta (en http://www.ine.es/jaxi/menu.do?type=pcaxis&path=/t25/p442&file=inebase) Solicitado al INE por CCAA y sexo, tramitándose el pago para obtener los datos.
	PROPIA		38	Percentil 80/20 (con alquiler imputado)			ESCALA (número)		Encuesta de condiciones de vida. INE	http://www.ine.es/jaxiBD/tabla.do?per=12&type=db&divi=ECV&idtab=23			2004-2012	España			, ,	P	Solicitado al INE por CCAA y sexo, tramitándose el pago para obtener los datos.
	ARTÍCULO PÉREZ 2014 GACSAN		39	Dificultad para llegar a fin de mes	porcentaje de personas con 'Mucha dificultad' para llegar a fin de mes		Porcentaje		Encuesta de condiciones de vida. INE	http://www.ine.es/jaxi/tabla.do?path=/t25/p453/provi/l0/&file=01004.px&type=pcaxis&L=0			2004-2013	CCAA	Sí	<15, 16-29, 30-44, 45-64,>65	Nivel de estudios, Nacionalidad, Personas/Hogares, Actividad (ocupados, parados, jubilidaos, otros inactivos, no consta), tipo de hogar, decil de renta	I		Para datos <2002 está la el Panel de Hogares de la UE en http://www.ine.es/jaxi/menu.do?type=pcaxis&path=/t25/p442&file=inebase 2013 provisional
	PROTOCOLO FIS y ARTÍCULO PÉREZ 2014 GACSAN		40	Tasa de riesgo de pobreza	Umbral de pobreza: es el 60% de la mediana de los ingresos anuales por unidad de consumo (escala OCDE modificada), tomando la distribución de personas. Los ingresos por unidad de consumo se obtienen dividiendo los ingresos totales del hogar entre el número de unidades de consumo.		Porcentaje		Panel de Hogares de Europa (2000) y Encuesta de condiciones de vida (>2004). INE	http://www.ine.es/jaxiT3/Tabla.htm?t=4561	EUROSTAT	http://appsso.eurostat.ec.europa.eu/nui/show.do?query=BOOKMARK_DS-127845_QID_-671595FA_UID_-3F171EB0&layout=TIME,C,X,0;GEO,L,Y,0;UNIT,L,Z,0;INDICATORS,C,Z,1;&zSelection=DS-127845INDICATORS,OBS_FLAG;DS-127845UNIT,PC_POP;&rankName1=INDICATORS_1_2_-1_2&rankName2=UNIT_1_2_-1_2&rankName3=TIME_1_0_0_0&rankName4=GEO_1_2_0_1&sortC=ASC_-1_FIRST&rStp=&cStp=&rDCh=&cDCh=&rDM=true&cDM=true&footnes=false&empty…	2000-2012	CCAA	Sí			S	Para >=2004 se utilizaría el de alquiler imputado (ID41) ya que el Panel de Hogares de la UE de 2000 no lo incluye en la definición de la renta (en http://www.ine.es/jaxi/menu.do?type=pcaxis&path=/t25/p442&file=inebase) Solicitado al INE por CCAA y sexo, tramitándose el pago para obtener los datos.
	PROPIA		41	Tasa de riesgo de pobreza (con alquiler imputado)	Umbral de pobreza: es el 60% de la mediana de los ingresos anuales por unidad de consumo (escala OCDE modificada), tomando la distribución de personas. Los ingresos por unidad de consumo se obtienen dividiendo los ingresos totales del hogar entre el número de unidades de consumo.	El alquiler imputado se aplica a los hogares que no pagan un alquiler completo por ser propietarios o por ocupar una vivienda alquilada a un precio inferior al de mercado o a título gratuito. El valor que se imputa es el equivalente al alquiler que se pagaría en el mercado por una vivienda similar a la ocupada, menos cualquier alquiler realmente abonado. Asimismo se deducen de los ingresos totale…	Porcentaje		Encuesta de condiciones de vida. INE	http://www.ine.es/jaxiT3/Tabla.htm?t=4561	ECV	http://www.ine.es/jaxi/menu.do?type=pcaxis&path=%2Ft25/p453&file=inebase&L=0	2004-2012	CCAA				I	Incluido por CCAA y Solicitado al INE por CCAA y sexo, tramitándose el pago para obtener los datos.
	PROPIA		42	Tasa de riesgo de pobreza y/o exclusión social. Indicador AROPE	AROPE, por sus siglas en inglés, es At Risk of Poverty and/or Exclusión. En español es ERPE (personas En Riesgo de Pobreza y/o Exclusión). Indicador Estrategia Europea 2020.	Población que se encuentra en alguna de las tres situaciones siguientes: personas que viven con bajos ingresos (60% de la mediana del ingreso equivalente o por unidad de consumo), y/o personas que sufren privación material severa (4 de los 9 items definidos, incluye tv color y tlf.) y/o personas que viven en hogares con una intensidad de empleo muy bajo (por debajo del 20%). En caso de estar incl…	Porcentaje		Encuesta de condiciones de vida. INE. EUROSTAT	http://appsso.eurostat.ec.europa.eu/nui/show.do?query=BOOKMARK_DS-174798_QID_15092918_UID_-3F171EB0&layout=TIME,C,X,0;GEO,L,Y,0;UNIT,L,Z,0;INDICATORS,C,Z,1;&zSelection=DS-174798UNIT,PC_POP;DS-174798INDICATORS,OBS_FLAG;&rankName1=UNIT_1_2_-1_2&rankName2=INDICATORS_1_2_-1_2&rankName3=TIME_1_0_0_0&rankName4=GEO_1_2_0_1&sortC=ASC_-1_FIRST&rStp=&cStp=&rDCh=&cDCh=&rDM=true&cDM=true&footnes=false&empty=…	Publicaciones INE	http://www.ine.es/ss/Satellite?L=es_ES&c=INESeccion_C&cid=1259941637944&p=1254735110672&pagename=ProductosYServicios/PYSLayout&param3=1259924822888	2004-2013	CCAA			Con base 2013 tb según subindicadores (en riesgo pobreza, carencia material y baja intensidad en el trabajo). En ámbito España tb edad, sexo, formación, actividad, nacionalidad, tipo de hogar. En EUROSTAT está la misma tabla por regiones aunque añade los IC95%. Los resultados en UE-28 (EU-SILC, por países) tb están por edad, tipo hogar, situación profesional, educación.	I	Incluido por CCAA y Solicitado al INE por CCAA y sexo, tramitándose el pago para obtener los datos.
	PROTOCOLO FIS y ARTÍCULO PÉREZ 2014 GACSAN		43	Coeficiente de Gini	Indicador de desigualdad de renta.	Fluctúa entre 0 (no desigualdad) y 1 (máxima desigualdad)	ESCALA (número)		Encuesta de condiciones de vida. INE	http://www.ine.es/jaxiBD/tabla.do?per=12&type=db&divi=ECV&idtab=24	EUROSTAT	http://appsso.eurostat.ec.europa.eu/nui/show.do?query=BOOKMARK_DS-053230_QID_-1FC56858_UID_-3F171EB0&layout=TIME,C,X,0;GEO,L,Y,0;INDIC_IL,L,Z,0;INDICATORS,C,Z,1;&zSelection=DS-053230INDIC_IL,GINI_HND;DS-053230INDICATORS,OBS_FLAG;&rankName1=INDIC-IL_1_2_-1_2&rankName2=INDICATORS_1_2_-1_2&rankName3=TIME_1_0_0_0&rankName4=GEO_1_2_0_1&sortC=ASC_-1_FIRST&rStp=&cStp=&rDCh=&cDCh=&rDM=true&cDM=true&footn…	2004-2012	España			, ,	S	Para >=2004 se utilizaría el de alquiler imputado (ID44) ya que el Panel de Hogares de la UE de 2000 no lo incluye en la definición de la renta (en http://www.ine.es/jaxi/menu.do?type=pcaxis&path=/t25/p442&file=inebase) Solicitado al INE por CCAA y sexo, tramitándose el pago para obtener los datos.	Para datos <2002 está la el Panel de Hogares de la UE en http://www.ine.es/jaxi/menu.do?type=pcaxis&path=/t25/p442&file=inebase
	PROPIA		44	Coeficiente de Gini (con alquiler imputado)	Indicador de desigualdad de renta donde la definición de renta del hogar incluye el alquiler imputado.	Fluctúa entre 0 (no desigualdad) y 1 (máxima desigualdad). El alquiler imputado se aplica a los hogares que no pagan un alquiler completo por ser propietarios o por ocupar una vivienda alquilada a un precio inferior al de mercado o a título gratuito. El valor que se imputa es el equivalente al alquiler que se pagaría en el mercado por una vivienda similar a la ocupada, menos cualquier alquiler re…	ESCALA (número)		Encuesta de condiciones de vida. INE	http://www.ine.es/jaxiBD/tabla.do?per=12&type=db&divi=ECV&idtab=24			2004-2012	España			, ,	P	Solicitado al INE por CCAA y sexo, tramitándose el pago para obtener los datos.	Gemma y Elena: NO EXISTEN DATOS PARA TODAS LA CCAA (PROBLEMAS CON LAS UNIPROVINCIALES), PERO ES POSIBLE ESTIMAR ESTE VALOR (NO CONSTRUIR).
	PROPIA		45	Riqueza neta de los hogares			ESCALA (importe en euros)	Se está realizando en 2014 otra oleada. Informe sobre esta encuesta en http://barometrosocial.es/archivos/1183	Encuesta Financiera de las Familias. Banco de España	http://www.bde.es/bde/es/areas/estadis/Otras_estadistic/Encuesta_Financi/	Eurosystem’s Household Finance and Consumption Survey (HFCS). European Central Bank	http://www.ecb.europa.eu/home/html/researcher_hfcn.en.html	2002, 2005, 2008, 2011	España			, ,	E	Respuesta del BDE: No se facilitan desgloses por CCAA ya que la muestra sólo es representativa, a través de los pesos facilitados, a nivel nacional pero no a nivel más desagregado. Este problema es especialmente relevante en el caso de la EFF cuya muestra está marcadamente estratificada por riqueza.
	PROPIA		185	Tasa de riesgo de pobreza infantil		Menores de 16 años	Porcentaje		Encuesta de condiciones de vida. INE	http://www.ine.es/jaxiT3/Tabla.htm?t=4577			2000-2012	España	Sí		Edad: <16; 16-29; 30-44: 45-64;>=65 años	P	Para >=2004 se utilizaría el de alquiler imputado (ID46) ya que el Panel de Hogares de la UE de 2000 no lo incluye en la definición de la renta (en http://www.ine.es/jaxi/menu.do?type=pcaxis&path=/t25/p442&file=inebase) Solicitado al INE por CCAA y sexo, tramitándose el pago para obtener los datos.
	PROPIA		46	Tasa de riesgo de pobreza infantil (con alquiler imputado)		Menores de 16 años	Porcentaje		Encuesta de condiciones de vida. INE	http://www.ine.es/jaxiT3/Tabla.htm?t=4577	UNICEF. La Infancia en España 2014	http://www.unicef.es/sites/www.unicef.es/files/infancia-espana/unicef_informe_la_infancia_en_espana_2014.pdf	2004-2012	España	Sí		Edad: <16; 16-29; 30-44: 45-64;>=65 años	P	Solicitado al INE por CCAA y sexo, tramitándose el pago para obtener los datos.
	PROPIA		186	Tasa de riesgo de pobreza y/o exclusión social infantil. Indicador AROPE		Menores de 16 años	Porcentaje		Encuesta de condiciones de vida. INE	http://www.ine.es/jaxiT3/Tabla.htm?t=4586			2004-2012	España	Sí		Edad: <16; 16-29; 30-44: 45-64;>=65 años	P	Solicitado al INE por CCAA y sexo, tramitándose el pago para obtener los datos.
	PROTOCOLO FIS		47	Renta agregada (deciles)	Proporción de la renta agregada que tienen los hogares con renta debajo de un percentil determinado (distintos percentiles).	El que se referencia aquí es el de personas por decil de renta por unidad de consumo. Los ingresos por unidad de consumo se obtienen, para cada hogar, dividiendo los ingresos totales del hogar entre el número de unidades de consumo. Se toma la distribución de personas. Se descargan primer y noveno decil	ESCALA (número)		Encuesta de condiciones de vida. INE	http://www.ine.es/jaxiT3/Tabla.htm?t=4560			2004-2012	CCAA			Se puede seleccionar el decil. En España tb hay según sexo, edad, formación actividad, nacionalidad y hogar	I		Valorar construir un nuevo indicador que sea la división entre el noveno decil y el primer decil
	PROTOCOLO FIS		48	Índice de Theil	Permite analizar la desigualdad de renta dentro y entre determinadas áreas geográficas (Comunidades Autónomas).	El índice oscila entre 0 (igualdad perfecta) y 1 (máxima desigualdad).	ESCALA (número)		Centro de Estudios Andaluces. Junta de Andalucía.	http://www.centrodeestudiosandaluces.es/datos/factoriaideas/IF006_11.pdf			1980, 1990, 2003				, ,	E	No datos por CCAA ni serie necesaria
Determinantes estructurales de contexto socioeconómico y político relacionados con políticas del estado de bienestar: sanidad	XAVIER BARTOLL	SANIDAD Y SALUD	49	Gasto público corriente en Sanidad	CLASIFICACIÓN FUNCIONAL DE LA LIQUIDACIÓN DE LOS PRESUPUESTOS DEPURADOS IFL y PAC. Datos consolidados.	Se considera la suma de los capítulos de gasto 1 (personal), 2 (bienes y servicios) y 4 (transferencias corrientes) ya que son los gastos corrientes (recibe el ciudadano). Los capítulos 6 y 7 son inversiones y transferencias de capital. 8 y 9 son variaciones de avales y amortizacion de deuda. Como la inversion, 6 y 7, puede fluctuar de un año a otro y tiene efectos a medio plazo, no se considera …	Euros	No se ha considerado 2002-2005 ya que cambia el desglose funcional. El tipo de importe depurado de IFL (Intermediación Financiera Local) y ayudas PAC (Política Agraria Comunitaria) no está disponible para 2006 y años anteriores, por lo que se considera importe sin depurar. En ambos casos, las CC.AA actúan como meras intermediarias de los fondos percibidos. El primer análisis de políticas públicas…	Liquidación de presupuestos de CCAA. Ministerio de Hacienda y Administraciones Públicas.	http://serviciosweb.meh.es/Apps/Publicacionliquidacion/aspx/menuInicio.aspx			2006-2012	CCAA				C	Sumar capítulos 1, 2 y 4 y transponer base para su análisis	Valorar construir el per cápita. Valorar utilizar tb inversiones reales y transferencias de capital
	PROPIA		50	Gasto sanitario público	Total consolidado. Principio de devengo		Miles Euros		Estadística de Gasto Sanitario Público (EGSP). Ministerio de Sanidad, Servicios Sociales e Igualdad (Tabla 25)	http://www.msssi.gob.es/estadEstudios/estadisticas/sisInfSanSNS/pdf/egspGastoReal.xls	Sistema de Información Sanitaria. Ministerio de Sanidad, Servicios Sociales e Igualdad	http://www.msssi.gob.es/estadEstudios/estadisticas/inforRecopilaciones/gastoSanitario2005/home.htm	2002-2012	CCAA				C	Transponer base para su análisis	Tb desagregado según subsectores de gasto (administración central, CCAA, Seguridad Social, Mutualidades, Corporaciones locales) y disponible en % de aportación de los subsectores al gasto total consolidados; tb desagregado por conceptos de cuenta satélite (investigación y formación; administración general) y por servicios (hospitalarios, primarios, docencia, salud pública).
	PROPIA		51	Presupuesto Sanitario por habitante	Presupuestos sanitarios iniciales, consolidados al nivel de cada Comunidad Autónoma, de aquellas entidades que las CCAA han incluido en sus presupuestos consolidados. Quedan, por tanto, excluidas las fundaciones, los consorcios, las empresas públicas y cualquier otro ente público con presupuesto estimativo que realicen actividades en el ámbito de la sanidad.		Euros		Recursos económicos del Sistema Nacional de Salud. Ministerio de Sanidad, Servicios Sociales e Igualdad	http://www.msssi.gob.es/estadEstudios/estadisticas/inforRecopilaciones/docs/presupuestosIniciales.xls	Sistema de Información Sanitaria. Ministerio de Sanidad, Servicios Sociales e Igualdad	http://www.msssi.gob.es/estadEstudios/estadisticas/sisInfSanSNS/finGastoSanit.htm	2007-2013	CCAA				S	Se utilizaría el de gasto sanitario por habitante protegido (ID54)	También está disponible en miles de Euros, estructura porcentual y variación interanual; desagregado por programa (servicio de apoyo a las familias, atención sanitaria, servicio público de salud...) aunque las series no están construidas
	PROPIA		52	PIB Actividades sanitarias y de servicios sociales	Producto Interior Bruto a precios de mercado por ramas de actividad y precios corrientes		Miles Euros		Contabilidad Regional de España. Serie contable en base 2008 y en base 2000. Resultados detallados. INE	http://www.ine.es/jaxi/menu.do?type=pcaxis&path=%2Ft35%2Fp010&file=inebase&L=0			2008-2009 (base 2008) y 2000-2007 (base 2000)	CCAA				P	>=2010 y desglosado para servicios sociales	Disponible tb en tasas de variación interanuales y en estructura porcentual.
	PROPIA		53	Gasto en salud			Millones Euros		INEbase. Indicadores sociales. INE	http://www.ine.es/daco/daco42/sociales11/sociales.htm			1991-2009	España			, , Gasto público/privado	P	Datos por CCAA y serie >=2005	"Gemma y Elena: en www.fbbva.es/TLFU/dat/NdP_FBBVA_Ivie_sanidad5.doc viene como % del PIB y por habitante para cada CCAA de 2002 a 2010, pudiéndose calcular el total. Estadística de Gasto Sanitario Público (EGSP). Serie 2008-2012, total por CCAA"
	PROPIA		54	Gasto sanitario público territorializado, por habitante protegido	Gasto sanitario de Servicios de Salud de las CCAA y de Ceuta y Melilla (Ingesa), así como el de las respectivas administraciones territoriales sanitarias. No se incluye el gasto en los servicios sanitarios prestados por el resto de los agentes de la Administración del Estado. Habitante protegido: Padrón a 1 de enero del año de referencia menos los colectivos MUFACE, MUGEJU e ISFAS protegidos medi…	Gasto sanitario de las Comunidades Autónomas y de las ciudades con estatuto de Autonomía entre la Población protegida por el SNS	Euros	Las cifras de población estan calculadas a 1 de julio y revisadas en base al Censo de 2001. En julio de 2007 se han actualizado las estimaciones de 2002 a 2007 (Estimaciones de la Población Actual). Ruptura de serie en 1999 y 2003.	Indicadores Clave del Sistema Nacional de Salud: INCLASNS – Base de Datos	https://www.msssi.gob.es/estadEstudios/estadisticas/sisInfSanSNS/inclasSNS_DB.htm	Estadística del gasto sanitario Público (EGSP). MSSSI	https://www.msssi.gob.es/estadEstudios/estadisticas/inforRecopilaciones/gastoSanitario2005/home.htm	2002-2012	CCAA				C	Transformar tabla para el análisis. Añadidos datos de 2012 que pasa el MSSSI (enviada pregunta por qué difieren los datos enviados de 2011 con los del INSCLASNS con respuesta de que son actualizaciones que se producen en la fuente original pero no en el INSCLASNS por lo que HAY QUE MODIFICAR LOS DATOS DE 2011 con los de la tabla enviada por el MSSSI, descargada en datos)
	PROPIA		55	Porcentaje del gasto sanitario en Atención Primaria	Servicios sanitarios realizados por medicina de familia, pediatría, enfermería, y demás personal sanitario y no sanitario en el primer nivel de asistencia sanitaria. Asimismo comprende el gasto efectuado en la formación de médicos especialistas residentes.	Gasto sanitario público en atención primaria, entre el total del gasto sanitario público corriente	Porcentaje		Indicadores Clave del Sistema Nacional de Salud: INCLASNS – Base de Datos	https://www.msssi.gob.es/estadEstudios/estadisticas/sisInfSanSNS/inclasSNS_DB.htm	Estadística del gasto sanitario Público (EGSP). MSSSI	https://www.msssi.gob.es/estadEstudios/estadisticas/inforRecopilaciones/gastoSanitario2005/home.htm	2002-2012	CCAA				C	Transformar tabla para el análisis y borrar variables sin datos. Añadidos datos de 2012 que pasa el MSSSI (enviada pregunta por qué difieren los datos enviados de 2011 con los del INSCLASNS con respuesta de que son actualizaciones que se producen en la fuente original pero no en el INSCLASNS por lo que HAY QUE MODIFICAR LOS DATOS DE 2011 con los de la tabla enviada por el MSSSI, descargada en dat…
	PROPIA		56	Porcentaje del gasto sanitario en Atención Especializada	Asistencia sanitaria prestada por médicos especialistas y demás personal sanitario y no sanitario encaminada a conseguir el mantenimiento y mejora de la salud mediante la actividad asistencial que se realiza en hospitales o centros de especialidades. Comprende los servicios concertados para la actividad propia de este nivel asistencial. Asimismo comprende el gasto efectuado en la formación de méd…	Gasto sanitario público en servicios hospitalarios y especializados entre el total del gasto sanitario público corriente	Porcentaje		Indicadores Clave del Sistema Nacional de Salud: INCLASNS – Base de Datos	https://www.msssi.gob.es/estadEstudios/estadisticas/sisInfSanSNS/inclasSNS_DB.htm	Estadística del gasto sanitario Público (EGSP). MSSSI	https://www.msssi.gob.es/estadEstudios/estadisticas/inforRecopilaciones/gastoSanitario2005/home.htm	2002-2012	CCAA				C	Transformar tabla para el análisis y borrar variables sin datos. Añadidos datos de 2012 que pasa el MSSSI (enviada pregunta por qué difieren los datos enviados de 2011 con los del INSCLASNS con respuesta de que son actualizaciones que se producen en la fuente original pero no en el INSCLASNS por lo que HAY QUE MODIFICAR LOS DATOS DE 2011 con los de la tabla enviada por el MSSSI, descargada en dat…
	ARTÍCULO PÉREZ 2014 GACSAN		57	Gasto total en salud como porcentaje del PIB		De 1991 a 1994 PIBpm base 1995, de 1995 a 1999 el PIBpm base 2000. De 2000 a 2009 el PIBpm está en base 2008 y es una estimación provisional	Porcentaje	Ruptura de serie en 1999 y 2003	INEbase. Indicadores sociales. INE	http://www.ine.es/daco/daco42/sociales11/sociales.htm			1991-2009	Países, Europa			, , Gasto público/privado	P	No datos por CCAA ni serie necesaria
	PROPIA		58	Porcentaje del gasto en farmacia	Recoge específicamente el gasto por las recetas médicas expedidas. No incluye el gasto de productos farmacéuticos que puedan dispensarse directamente en las instituciones sanitarias. Gasto sanitario público corriente: Incluye el gasto sanitario (excluido el gasto de capital) financiado por el sistema público, bien sea producido por medios propios como realizado con medios ajenos a través de conci…	Gasto sanitario público en farmacia entre el total del gasto sanitario público corriente	Porcentaje		Indicadores Clave del Sistema Nacional de Salud: INCLASNS – Base de Datos	https://www.msssi.gob.es/estadEstudios/estadisticas/sisInfSanSNS/inclasSNS_DB.htm	Estadística del gasto sanitario Público (EGSP). MSSSI	https://www.msssi.gob.es/estadEstudios/estadisticas/inforRecopilaciones/gastoSanitario2005/home.htm	2002-2011	CCAA				C	Transformar tabla para el análisis y borrar variables sin datos. Serie >2011
	ARTÍCULO PÉREZ 2014 GACSAN		59	Gasto farmacéutico del SNS	A través de receta oficial del Sistema Nacional de Salud (no incluye MUFACE, ISFAS ni MUGEJU)	Datos anuales acumulados (tb disponible dato mensual)	Euros		Facturación de recetas médicas. Ministerio de Sanidad, Servicios Sociales e Igualdad	https://www.msssi.gob.es/profesionales/farmacia/datos/home.htm	Sistema de Información Sanitaria. Ministerio de Sanidad, Servicios Sociales e Igualdad	https://www.msssi.gob.es/estadEstudios/estadisticas/sisInfSanSNS/medProdSanit.htm	2004-2014	CCAA				NP	Hay que construir la serie (en www.redaccionmedica.com/contenido/images/eae_gasto_farmaceutico.pdf ya está la serie 2005 a 2011 por CCAA). Sin embargo, según la fuente, los datos aportados no deben usarse en términos comparativos entre CC.AA. dado que, entre otras razones, no consideran variaciones poblacionales acaecidas en las respectivas CC.AA.
			60	Gasto medio farmacéutico por receta facturada del SNS	A través de receta oficial del Sistema Nacional de Salud	Datos anuales acumulados (tb disponible dato mensual)	Euros		Facturación de recetas médicas. Ministerio de Sanidad, Servicios Sociales e Igualdad	https://www.msssi.gob.es/profesionales/farmacia/datos/home.htm	Sistema de Información Sanitaria. Ministerio de Sanidad, Servicios Sociales e Igualdad	https://www.msssi.gob.es/estadEstudios/estadisticas/sisInfSanSNS/medProdSanit.htm	2004-2014	CCAA				NP
			61	Gasto farmacéutico RELATIVO de Seguridad Social	Gasto con respecto al total del Gasto público en salud (incluye SNS, MUFACE, ISFAS ni MUGEJU)	Datos anuales acumulados	Porcentaje		INEbase. Indicadores sociales. INE	http://www.ine.es/daco/daco42/sociales11/sociales.htm	OCDE, ECO-SALUD OCDE 2011. Estadísticas e Indicadores		1991-2009	Países, Europa			, ,	E	No serie necesaria	"Gemma y Elena: 2005 a 2011 por CCAA y euros en www.redaccionmedica.com/contenido/images/eae_gasto_farmaceutico.pdf. Además, el proyecto REBECA del msssi proporciona links por CCAA para obtener la información y hay diferentes enlaces por aéreas temáticas"
			62	Gasto farmacéutico de Seguridad Social TOTAL	Gasto con respecto al total del Gasto público en salud (incluye SNS, MUFACE, ISFAS ni MUGEJU)	Datos anuales acumulados	Miles Euros	Sólo el Sistema Nacional de Salud da distinto tratamiento a activos y pensionistas	INEbase. Indicadores sociales. INE	http://www.ine.es/daco/daco42/sociales11/sociales.htm	INSALUD, Indicadores de la Prestación Farmacéutica (1991-2001); MSSSI, Dirección General de Farmacia y Productos Sanitarios (2002-2010); MUFACE; ISFAS; MUGEJU, Memoria		1991-2010	Provincia			Según SNS, MUFACE, , ISFAS ni MUGEJU	E
			63	Gasto farmacéutico de Seguridad Social PERSONA PROTEGIDA	Gasto con respecto al total del Gasto público en salud (incluye SNS, MUFACE, ISFAS ni MUGEJU)		Euros		INEbase. Indicadores sociales. INE	http://www.ine.es/daco/daco42/sociales11/sociales.htm			1998-2010	Provincia			, ,	E
			64	Gasto farmacéutico de Seguridad Social POR RECETA	Gasto con respecto a SNS total, activos y pensionistas, MUFACE, ISFAS ni MUGEJU		Euros	Tb disponible importe PVP por receta	INEbase. Indicadores sociales. INE	http://www.ine.es/daco/daco42/sociales11/sociales.htm			1991-2010	Provincia			, ,	E
			65	Gasto farmacéutico de Seguridad Social ÍNDICE DE COBERTURA	Gasto con respecto a SNS total, activos y pensionistas, MUFACE, ISFAS ni MUGEJU	Cociente entre el gasto medio por receta y el importe medio por receta, expresado en porcentaje.	Porcentaje	MUGEJU no calcula el importe por receta.	INEbase. Indicadores sociales. INE	http://www.ine.es/daco/daco42/sociales11/sociales.htm			1991-2010	Provincia			, ,	E		Gemma y Elena: se podría calcular si se encuentra la serie del importe medio por receta (ya que ya se dispone del gasto total por receta).
			66	Valoración del sistema sanitario público	Personas ≥16 años que valoran positivamente el sistema sanitario público.		Porcentaje	No especifica a qué se refiere con bueno o muy bueno, no corresponde con las preguntas de la fuente primaria. Según la fuente del CIS este indicador sería el mismo que el ID67	Sistema de Información Sanitaria. Ministerio de Sanidad, Servicios Sociales e Igualdad	http://www.msssi.gob.es/estadEstudios/estadisticas/sisInfSanSNS/informeAnual.htm	Barómetro de atención sanitaria. CIS. Obtenido del Barómetro Social de España.	http://barometrosocial.es/salud	1995-2011	España			, ,	E	Parece ser el mismo que el ID67, aunque ese no hace referencia expresamente al sistema sanitario público sino al sistema sanitario español
	PROPIA		67	Opinión funcionamiento del Sistema Sanitario en España	Pregunta del Barómetro Sanitario: "De las siguientes afirmaciones que aparecen en esta tarjeta, ¿cuál expresa mejor su opinión sobre el sistema sanitario en nuestro país?	Categorías de: en general, funciona bastante bien; funciona bien, pero son necesarios algunos cambios; necesita cambios fundamentales, aunque algunas cosas funciona; está tan mal que se necesitaría rehacerlo	Porcentaje		Portal estadístico del SNS. Consulta Interactiva del SNS. Ministerio de Sanidad, Servicios Sociales e Igualdad	http://pestadistico.inteligenciadegestion.msssi.es/Informe.aspx?IdNodo=6441&ReportPath=/BARSAN/C%C3%B3mo%20funciona%20el%20Sistema%20Sanitario	Búsqueda avanzada de estudios. CIS	http://www.analisis.cis.es/cisdb.jsp	1995-2013	CCAA			, ,	C	Recuperar de la fuente primaria y hacerlo de manera similar al ID68	En el CIS es la Serie L.1.02.02.001, siguiendo los pasos del ID160 tb se podría construir la serie por CCAA
	PROPIA		68	Satisfacción general con el funcionamiento del Sistema Sanitario público en España	Pregunta del Barómetro Sanitario: "¿Está Ud. satisfecho/a o insatisfecho/a con el modo en que el sistema sanitario público funciona en España?"	Escala Liker 1 (muy insatisfecho) a 10 (muy satisfecho)	Puntuación media		Indicadores Clave del Sistema Nacional de Salud: INCLASNS – Base de Datos	https://www.msssi.gob.es/estadEstudios/estadisticas/sisInfSanSNS/inclasSNS_DB.htm	Búsqueda avanzada de estudios. CIS	http://www.analisis.cis.es/cisdb.jsp	2005-2012	CCAA	Sí		, ,	C	TRANSPONER LA BD PARA EL ANÁLISIS	En http://pestadistico.inteligenciadegestion.msssi.es/Informe.aspx?IdNodo=6442&ReportPath=/BARSAN/Satisfacci%C3%B3n%20con%20el%20funcionamiento%20del%20Sistema%20Sanitario viene de 2002-2013 por CCAA (no por sexo) En el CIS, con Serie L.1.02.02.002, viene 2001-2013, siguiendo ID160 se podría construir la serie
	PROPIA		69	Esperanza de vida en buena salud al nacer	Promedio de número de años esperados que vive una persona disfrutando de buena salud (en ausencia de limitaciones funcionales o de discapacidad). Este indicador combina información de mortalidad y de morbilidad.		Media	En su cálculo se distingue el colectivo de hombres del colectivo de mujeres, tomando datos al nacimiento y a los 65 años de edad. Se basa en la prevalencia (proporción de personas que sufren una enfermedad con respecto al total de la población en estudio) de la población a una edad específica con buena y mala salud, y en la información sobre mortalidad específica por edades. Se considera condició…	Indicadores Clave del Sistema Nacional de Salud: INCLASNS – Base de Datos	https://www.msssi.gob.es/estadEstudios/estadisticas/sisInfSanSNS/inclasSNS_DB.htm	Publicaciones INE	http://www.ine.es/ss/Satellite?L=es_ES&c=INESeccion_C&cid=1259926378861&p=1254735110672&pagename=ProductosYServicios%2FPYSLayout	1991, 2002, 2007, 2009, 2011	CCAA	Sí (2009, 2011)		Desde 1991 para España y sexo	E	No serie disponible Solicitado datos según sexo y CCAA para los años anteriores (1991, 2002, 2007) con respuesta de "no se disponen de estimaciones del indicador para esos años por comunidad autónoma y sexo".	Para sexo y año son tablas para cada CCAA
	PROPIA		70	Esperanza de vida en buena salud a los 65 años (tb conocido como esperanza de vida libre de discapacidad)			Media		Indicadores Clave del Sistema Nacional de Salud: INCLASNS – Base de Datos	https://www.msssi.gob.es/estadEstudios/estadisticas/sisInfSanSNS/inclasSNS_DB.htm	Publicaciones INE	http://www.ine.es/ss/Satellite?L=es_ES&c=INESeccion_C&cid=1259926378861&p=1254735110672&pagename=ProductosYServicios%2FPYSLayout	1991, 2002, 2007, 2009, 2011	CCAA	Sí (2009, 2011)		Desde 1991 para España y sexo	C	No serie disponible Solicitado datos según sexo y CCAA para los años anteriores (1991, 2002, 2007) con respuesta de "no se disponen de estimaciones del indicador para esos años por comunidad autónoma y sexo".
Determinantes intermedios de servicios de salud	ARTÍCULO PÉREZ 2014 GACSAN		71	Consulta al médico de familia o pediatra	en las últimas 4 semanas		Porcentaje		Encuesta Nacional de Salud de España. Ministerio de Sanidad, Servicios Sociales e Igualdad	http://www.msssi.gob.es/estadEstudios/estadisticas/encuestaNacional/home.htm			1987, 1993, 1995, 1997, 2001, 2003, 2006, 2011	CCAA	Sí	Sí	Nivel de estudios, Clase social (SEE), Dificultad fin de mes, Nacionalidad,	C	No utilidad
			72	Consulta al médico especialista	en las últimas 4 semanas		Porcentaje			http://www.msssi.gob.es/estadEstudios/estadisticas/encuestaNacional/home.htm				CCAA	Sí	Sí	Nivel de estudios, Clase social (SEE), Dificultad fin de mes, Nacionalidad,	C	No utilidad
			73	Lista de espera para ingreso hospitalario	en los últimos 12 meses		Porcentaje			http://www.msssi.gob.es/estadEstudios/estadisticas/encuestaNacional/home.htm				CCAA	Sí	Sí	Nivel de estudios, Clase social (SEE), Dificultad fin de mes, Nacionalidad,	C	Desde los microdatos, ya que no vienen para CCAA
			74	Doble cobertura sanitaria		Cobertura sanitaria mixta: pública y privada	Porcentaje			http://www.msssi.gob.es/estadEstudios/estadisticas/encuestaNacional/home.htm				CCAA	Sí	Sí	Nivel de estudios, Clase social (SEE), Dificultad fin de mes, Nacionalidad,	C	Desde los microdatos, ya que no vienen para CCAA
	PROPIA		75	Tasa Personal médico en atención especializada	Número de médicos en atención especializada por cada 1000 habitantes	Personal médico que presta servicio en el centro con internamiento y centros de especialidades con la misma unidad de gestión, independientemente de su puesto, tanto en el hospital como en los centros de especialidades. Se tendrá en cuenta el personal vinculado contractualmente y no los puestos de trabajo que figuran en plantilla. Incluye tanto el personal que presta sus servicios en el hospital,…	Tasa (1000 hab)		Indicadores Clave del Sistema Nacional de Salud: INCLASNS – Base de Datos	https://www.msssi.gob.es/estadEstudios/estadisticas/sisInfSanSNS/inclasSNS_DB.htm	"Estadística de Centros Sanitarios de Atención Especializada". MSSSI	http://pestadistico.inteligenciadegestion.msssi.es	1996-2011	CCAA			También disponible el porcentaje de mujeres en la categoria de personal médico de especializada sobre el total de médicos de especializada	C	AÑADIR DATOS 2012 Y 2013 dados por el MSSSI TRANSPONER LA BD PARA EL ANÁLISIS
	PROPIA		76	Tasa Personal de Enfermería en atención especializada	Número de enfermeras en atención especializada por cada 1000 habitantes	Personal de enfermería que presta servicio en el centro con internamiento y centros de especialidades con la misma unidad de gestión, independientemente de su puesto, tanto en el hospital como en los centros de especialidades. Se tendrá en cuenta el personal vinculado contractualmente y no los puestos de trabajo que figuran en plantilla. Incluye tanto el personal que presta sus servicios en el ho…	Tasa (1000 hab)		Indicadores Clave del Sistema Nacional de Salud: INCLASNS – Base de Datos	https://www.msssi.gob.es/estadEstudios/estadisticas/sisInfSanSNS/inclasSNS_DB.htm	"Estadística de Centros Sanitarios de Atención Especializada". MSSSI	http://pestadistico.inteligenciadegestion.msssi.es	1996-2011	CCAA				C	modificar dato PV 2011 (3.84) AÑADIR DATOS 2012 Y 2013 dados por el MSSSI TRANSPONER LA BD PARA EL ANÁLISIS
	PROPIA		77	Porcentaje de personal médico en el SNS en atención especializada	Número de médicos de centros que pertenecen al SNS entre el total de médicos de Atención Especializada	Definición anterior de médico de AE. Centros que pertenecen al SNS: La red Pública SNS está compuesta por aquellos centros de dependencia y financiación pública más los centros de dependencia privada (con o sin ánimo de lucro) que mantiene un concierto sustitutorio o pertenecen a una Red de Utilización Pública (*), es decir están financiados con fondos públicos.	Porcentaje		Indicadores Clave del Sistema Nacional de Salud: INCLASNS – Base de Datos	https://www.msssi.gob.es/estadEstudios/estadisticas/sisInfSanSNS/inclasSNS_DB.htm	"Estadística de Centros Sanitarios de Atención Especializada". MSSSI	http://pestadistico.inteligenciadegestion.msssi.es	1996-2011	CCAA				C	AÑADIR DATOS 2012 Y 2013 dados por el MSSSI TRANSPONER LA BD PARA EL ANÁLISIS
	PROPIA		78	Porcentaje de personal de enfermería en el SNS en atención especializada	Número de enfermeras de centros que pertenecen al SNS entre el total de enfermeras de Atención Especializada	Definición anterior de enfermera de AE. Centros que pertenecen al SNS: La red Pública SNS está compuesta por aquellos centros de dependencia y financiación pública más los centros de dependencia privada (con o sin ánimo de lucro) que mantiene un concierto sustitutorio o pertenecen a una Red de Utilización Pública (*), es decir están financiados con fondos públicos.	Porcentaje		Indicadores Clave del Sistema Nacional de Salud: INCLASNS – Base de Datos	https://www.msssi.gob.es/estadEstudios/estadisticas/sisInfSanSNS/inclasSNS_DB.htm	"Estadística de Centros Sanitarios de Atención Especializada". MSSSI	http://pestadistico.inteligenciadegestion.msssi.es	1996-2011	CCAA				C	modificar dato PV 2011 (90.11) y España 2011 (90.68) AÑADIR DATOS 2012 Y 2013 dados por el MSSSI TRANSPONER LA BD PARA EL ANÁLISIS
	PROPIA		79	Tasa de personal médico en atención primaria	Número de médicos en atención primaria por cada 1000 personas asignadas a atención primaria	Incluye el número de profresionales en plazas de medicina familia y de pediatría, que trabaja en los centros de salud y consultorios locales, en las modalidades de: equipo de atención primaria, modelo tradicional y pediatría de Área. No incluye médicos internos y residentes, ni plazas exclusivas de urgencia en ninguna de sus modalidades, ni ninguna otra situación distinta a las mencionadas (como …	Tasa (1000 personas asignadas)		Indicadores Clave del Sistema Nacional de Salud: INCLASNS – Base de Datos	https://www.msssi.gob.es/estadEstudios/estadisticas/sisInfSanSNS/inclasSNS_DB.htm	Sistema de información de atención primaria (SIAP). MSSSI		2004-2012	CCAA				C	TRANSPONER LA BD PARA EL ANÁLISIS
	PROPIA		80	Tasa de personal de enfermería en atención primaria	Número de enfermeras en atención primaria por cada 1000 personas asignadas a atención primaria	Incluye el número de profresionales en plazas de medicina familia y de pediatría, que trabaja en los centros de salud y consultorios locales, en las modalidades de: equipo de atención primaria, modelo tradicional y pediatría de Área. No incluye plazas exclusivas de urgencia en ninguna de sus modalidades, ni ninguna otra situación distinta a las mencionadas (como personal directivo u otros no asis…	Tasa (1000 personas asignadas)		Indicadores Clave del Sistema Nacional de Salud: INCLASNS – Base de Datos	https://www.msssi.gob.es/estadEstudios/estadisticas/sisInfSanSNS/inclasSNS_DB.htm	Sistema de información de atención primaria (SIAP). MSSSI		2004-2012	CCAA				C	TRANSPONER LA BD PARA EL ANÁLISIS
	PROPIA		81	Personal de farmacia por 100.000 habitantes	Data refer to human resources available for providing health care services in the country, irrespective of the sector of employment (i.e. whether they are independent, employed by a hospital or any other health care provider). Three different concepts are used to present the number of health care professionals: - 'practising', i.e. health care professionals providing services directly to patients…			No es comparable entres países (los conceptos y registros de cada uno puede variar) y hay que tener cuidado con la evolución ya que en España por ejemplo a partir de 2011 se excluyen a los odontólogos de la definición de médico según la CNO.	EUROSTAT	http://appsso.eurostat.ec.europa.eu/nui/show.do?query=BOOKMARK_DS-053214_QID_5F424F45_UID_-3F171EB0&layout=TIME,C,X,0;GEO,L,Y,0;UNIT,C,Z,0;ISCO08,L,Z,1;INDICATORS,C,Z,2;&zSelection=DS-053214UNIT,P_HTHAB;DS-053214INDICATORS,OBS_FLAG;DS-053214ISCO08,OC2262;&rankName1=UNIT_1_2_-1_2&rankName2=ISCO08_1_2_-1_2&rankName3=INDICATORS_1_2_-1_2&rankName4=TIME_1_0_0_0&rankName5=GEO_1_2_0_1&pprRK=FIRST&pprSO=…			1997-2011	CCAA,Países, Europa				I
	PROPIA		82	Personal dentista por 100.000 habitantes						http://appsso.eurostat.ec.europa.eu/nui/show.do?query=BOOKMARK_DS-053214_QID_AEC689D_UID_-3F171EB0&layout=TIME,C,X,0;GEO,L,Y,0;UNIT,C,Z,0;ISCO08,L,Z,1;INDICATORS,C,Z,2;&zSelection=DS-053214UNIT,P_HTHAB;DS-053214INDICATORS,OBS_FLAG;DS-053214ISCO08,OC2261;&rankName1=UNIT_1_2_-1_2&rankName2=ISCO08_1_2_-1_2&rankName3=INDICATORS_1_2_-1_2&rankName4=TIME_1_0_0_0&rankName5=GEO_1_2_0_1&pprRK=FIRST&pprSO=P…								I
	PROPIA		177	Personal fisioterapéuta por 100.000 habitantes						http://appsso.eurostat.ec.europa.eu/nui/show.do?query=BOOKMARK_DS-053214_QID_4F3D1E5E_UID_-3F171EB0&layout=TIME,C,X,0;GEO,L,Y,0;UNIT,C,Z,0;ISCO08,L,Z,1;INDICATORS,C,Z,2;&zSelection=DS-053214UNIT,P_HTHAB;DS-053214INDICATORS,OBS_FLAG;DS-053214ISCO08,OC2264;&rankName1=UNIT_1_2_-1_2&rankName2=ISCO08_1_2_-1_2&rankName3=INDICATORS_1_2_-1_2&rankName4=TIME_1_0_0_0&rankName5=GEO_1_2_0_1&pprRK=FIRST&pprSO=…								I
	PROPIA		178	Personal de enfermería y matronas por 100.000 habitantes						http://appsso.eurostat.ec.europa.eu/nui/show.do?query=BOOKMARK_DS-053214_QID_-5EBB10E5_UID_-3F171EB0&layout=TIME,C,X,0;GEO,L,Y,0;UNIT,C,Z,0;ISCO08,L,Z,1;INDICATORS,C,Z,2;&zSelection=DS-053214UNIT,P_HTHAB;DS-053214INDICATORS,OBS_FLAG;DS-053214ISCO08,OC222_322;&rankName1=UNIT_1_2_-1_2&rankName2=ISCO08_1_2_-1_2&rankName3=INDICATORS_1_2_-1_2&rankName4=TIME_1_0_0_0&rankName5=GEO_1_2_0_1&pprRK=FIRST&pp…								I
	PROPIA		83	Personal de medicina por 100.000 habitantes			ESCALA (número)			http://appsso.eurostat.ec.europa.eu/nui/show.do?query=BOOKMARK_DS-053214_QID_-336C8D7C_UID_-3F171EB0&layout=TIME,C,X,0;GEO,L,Y,0;UNIT,C,Z,0;ISCO08,L,Z,1;INDICATORS,C,Z,2;&zSelection=DS-053214UNIT,P_HTHAB;DS-053214INDICATORS,OBS_FLAG;DS-053214ISCO08,OC221;&rankName1=UNIT_1_2_-1_2&rankName2=ISCO08_1_2_-1_2&rankName3=INDICATORS_1_2_-1_2&rankName4=TIME_1_0_0_0&rankName5=GEO_1_2_0_1&sortC=ASC_-1_FIRST…								I		Cambio de definición en 2011 que limita la comparación de la serie
Determinantes estructurales de contexto socioeconómico y político relacionados con políticas del estado de bienestar: educación.	ARTÍCULO PÉREZ 2014 GACSAN	EDUCACIÓN	84	Gasto público en educación como porcentaje del PIB		Se excluyen capítulos financieros (disponible tb con capítulos financieros)	Porcentaje	Datos de España, serie 1995-2012 con base 2010 y serie 1992-1994 con base 1995. En Eurostat diferente disponibilidad de datos según país (España desde 1999).	EDUbase. Ministerio de Educación	http://www.mecd.gob.es/servicios-al-ciudadano-mecd/estadisticas/educacion/recursos-economicos/gasto-publico.html	Eurostat database. ESSPROS.	http://appsso.eurostat.ec.europa.eu/nui/show.do?dataset=educ_figdp&lang=en	1992-2012	CCAA,Países, Europa			, , Universitaria/no universitaria Por países disponible tb según nivel educativo	C	#HAY QUE TRANSPONER LA BD PARA EL ANÁLISIS
	PROPIA		85	Gasto público en Educación		Se excluyen capítulos financieros (disponible tb con capítulos financieros)	Miles de Euros	Datos de España, serie 1995-2012 con base 2010 y serie 1992-1994 con base 1995.	EDUbase. Ministerio de Educación	http://www.mecd.gob.es/servicios-al-ciudadano-mecd/estadisticas/educacion/recursos-economicos/gasto-publico.html	1.1. y 1.4 (universitaria / no universitaria). Gasto público en educación. Serie 1992-2012. Educación. Sociedad. INEBASE	http://www.ine.es/jaxi/menu.do?type=pcaxis&path=/t13/p012/&file=pcaxis&N=&L=0	1992-2012	CCAA			, , Universitaria/no universitaria, actividad/nivel educativa	C	#HAY QUE TRANSPONER LA BD PARA EL ANÁLISIS
	PROPIA		179	Gasto público en educación en relación al gasto público total		Se excluyen capítulos financieros (disponible tb con capítulos financieros)	Porcentaje	Datos de España, serie 2000-2012 con base 2008 y serie 1992-2000 con base 1995. En Eurostat diferente disponibilidad de datos según país (España desde 1999)	EDUbase. Ministerio de Educación	http://www.mecd.gob.es/servicios-al-ciudadano-mecd/estadisticas/educacion/recursos-economicos/gasto-publico.html	1.1. y 1.4 (universitaria / no universitaria). Gasto público en educación. Serie 1992-2012. Educación. Sociedad. INEBASE	http://www.ine.es/jaxi/menu.do?type=pcaxis&path=/t13/p012/&file=pcaxis&N=&L=0	1992-2012	CCAA			, , Universitaria/no universitaria, actividad/nivel educativa	C	#HAY QUE TRANSPONER LA BD PARA EL ANÁLISIS
	PROPIA		86	Gasto público en Educación per cápita														P	CCAA y >=2005
			101	Gasto en educación 0-2 años per cápita														P	Gloria Pérez enviaría o pedir Ministerio Educación
	ARTÍCULO PÉREZ 2014 GACSAN		87	Centros públicos de educación infantil por 100.000 habitantes			ESCALA (número)	Existe un resumen de unidad escolares para la serie 1984-2000. Disponible en números absolutos	EDUbase. Ministerio de Educación	http://www.mecd.gob.es/servicios-al-ciudadano-mecd/estadisticas/educacion/no-universitaria/centros/centros-servicios-estadisticas.html	INEbase. Educación. INE	http://www.ine.es/jaxi/menu.do?type=pcaxis&path=%2Ft13%2Fp001%2F&file=inebase&L=0	Cursos 1999-2000 a 2013-14	Provincia			, ,	P	CCAA y >=2005
			88	Becas y ayudas por 100.000 habitantes			ESCALA (número)	Disponible en números absolutos y Euros	EDUbase. Ministerio de Educación	http://www.mecd.gob.es/servicios-al-ciudadano-mecd/estadisticas/educacion/recursos-economicos/becas-ayudas.html			Cursos 1999-2000 a 2011-12	CCAA			, , Tipo de beca/ayuda	P	CCAA y >=2005
			89	Población sin estudios		Porcentaje de población ≥16 años sin estudios / ≥16 años	Porcentaje	Ruptura de serie en 2005 por cambio metodológico	INEbase. Indicadores sociales. INE	http://www.ine.es/daco/daco42/sociales10/educa-naci.xls		Tabla extraída de http://www.ine.es/daco/daco42/sociales11/sociales.htm	1991-2009	España	Sí		, ,	E	No CCAA
	PROPIA		90	Abandono temprano de la educación y la formación	Porcentaje de la población de 18 a 24 años que no ha completado el nivel de E. Secundaria 2.ª etapa y no sigue ningún tipo de educación-formación. Indicador Estrategia Europea 2020	Calculado con la metodología establecida por Eurostat basándose en medias anuales de datos trimestrales. El numerador son personas de 18 a 24 años con el máximo nivel educativo completado de ISCED 0, 1, 2 or 3C short y que no recibieron formación en las 4 semanas previas a la encuesta. El denominador es la población del mismo grupo de edad, excluyendo los entrevistados que no respondieron a las c…	Porcentaje	Los datos deben ser tomados con precaución, pues los derivados de tamaños muestrales pequeños están afectados por fuertes errores de muestreo	Encuesta de Población Activa. INE y EUROSTAT	http://appsso.eurostat.ec.europa.eu/nui/show.do?query=BOOKMARK_DS-108809_QID_774F29A1_UID_-3F171EB0&layout=TIME,C,X,0;GEO,L,Y,0;SEX,L,Z,0;UNIT,L,Z,1;AGE,L,Z,2;INDICATORS,C,Z,3;&zSelection=DS-108809UNIT,PC;DS-108809INDICATORS,OBS_FLAG;DS-108809SEX,M;DS-108809AGE,Y18-24;&rankName1=UNIT_1_2_-1_2&rankName2=AGE_1_2_-1_2&rankName3=INDICATORS_1_2_-1_2&rankName4=SEX_1_2_-1_2&rankName5=TIME_1_0_0_0&rankNa…	EDUbase. Ministerio de Educación	http://www.mecd.gob.es/servicios-al-ciudadano-mecd/estadisticas/educacion/mercado-laboral/explotacion-de-las-variables.html	2000-2013	CCAA,Países, Europa	Sí		, ,	I
			91	Población de 15-24 años que ni trabajan, ni estudian, ni se forman	Porcentaje de la población entre 15 y 24 años que no están envueltos en trabajo, educación o formación alguna	El númerador se refiere a personas que no están trabajando y que no recibieron educación o formación alguna en las 4 semanas previas a la encuesta. El denominador es la población del mismo grupo de edad y sexo, exluyendo los entrevistados que no respondieron la pregunta 'participación en educación y formación de manera regular'.	Porcentaje		Encuesta de Población Activa. INE y EUROSTAT	http://appsso.eurostat.ec.europa.eu/nui/show.do?query=BOOKMARK_DS-142921_QID_644DEDC_UID_-3F171EB0&layout=TIME,C,X,0;GEO,L,Y,0;SEX,L,Z,0;UNIT,L,Z,1;AGE,L,Z,2;INDICATORS,C,Z,3;&zSelection=DS-142921AGE,Y15-24;DS-142921INDICATORS,OBS_FLAG;DS-142921UNIT,PC;DS-142921SEX,F;&rankName1=UNIT_1_2_-1_2&rankName2=AGE_1_2_-1_2&rankName3=INDICATORS_1_2_-1_2&rankName4=SEX_1_2_-1_2&rankName5=TIME_1_0_0_0&rankNam…			2000-2013	CCAA,Países, Europa	Sí		Tb viene el mismo indicador para 18-24 años	I
			92	Población de 30-34 años con nivel de educación superior		Calculado con la metodología establecida por Eurostat basándose en medias anuales de datos trimestrales. Indicador Estrategia Europea 2020	Porcentaje	Los datos deben ser tomados con precaución, pues los derivados de tamaños muestrales pequeños están afectados por fuertes errores de muestreo	Encuesta de Población Activa. INE y EUROSTAT	http://appsso.eurostat.ec.europa.eu/nui/show.do?query=BOOKMARK_DS-108801_QID_-1F46334_UID_-3F171EB0&layout=TIME,C,X,0;GEO,L,Y,0;SEX,L,Z,0;UNIT,L,Z,1;AGE,L,Z,2;ISCED11,L,Z,3;INDICATORS,C,Z,4;&zSelection=DS-108801SEX,T;DS-108801AGE,Y30-34;DS-108801ISCED11,ED5-8;DS-108801INDICATORS,OBS_FLAG;DS-108801UNIT,PC;&rankName1=ISCED11_1_2_-1_2&rankName2=UNIT_1_2_-1_2&rankName3=AGE_1_2_-1_2&rankName4=INDICATO…	EDUbase. Ministerio de Educación	http://www.mecd.gob.es/servicios-al-ciudadano-mecd/estadisticas/educacion/mercado-laboral/explotacion-de-las-variables.html	2000-2013	CCAA,Países, Europa	Sí		, ,	I
			93	Máximo nivel educativo alcanzado por las personas 18-65 años	Datos referidos a los 12 meses anteriores a la fecha de la encuesta		Porcentaje		Encuesta sobre la Participación de la Población Adulta en las Actividades de Aprendizaje (EADA)	http://www.ine.es/jaxi/tabla.do?path=/t13/p459/a2011/p00/l0/&file=00001.px&type=pcaxis&L=0			2007, 2011	España	Sí	18-65, 25-64, 18-24, 25-34, 35-44, 45-54, 55-65	, País de origen, situación laboral, tipo de hogar	E	No datos por CCAA ni serie necesaria
			94	Porcentaje de población de 25-64 años que participa en educación-formación (últimas 4 semanas)	Porcentaje de personas entre 25 y 64 años (excluyendo aquellas que no contestaron las preguntas sobre 'participación en educación y formación) que recibiendo educación o formación en las 4 semanas previas a la encuesta.		Porcentaje			http://appsso.eurostat.ec.europa.eu/nui/show.do?query=BOOKMARK_DS-108841_QID_644B4056_UID_-3F171EB0&layout=TIME,C,X,0;GEO,L,Y,0;UNIT,L,Z,0;SEX,L,Z,1;AGE,L,Z,2;INDICATORS,C,Z,3;&zSelection=DS-108841INDICATORS,OBS_FLAG;DS-108841SEX,F;DS-108841UNIT,PC;DS-108841AGE,Y25-64;&rankName1=UNIT_1_2_-1_2&rankName2=AGE_1_2_-1_2&rankName3=INDICATORS_1_2_-1_2&rankName4=SEX_1_2_-1_2&rankName5=TIME_1_0_0_0&rankNa…	EDUbase. Ministerio de Educación	http://www.mecd.gob.es/servicios-al-ciudadano-mecd/estadisticas/educacion/mercado-laboral/explotacion-de-las-variables.html	2000-2013	CCAA,Países, Europa	Sí			I
	PROPIA		95	Inversión media en educación (hogares)	inversión media por estudiante que supone para los hogares cursar estudios en los distintos niveles educativos		Euros	Solo se dispone de la estimación para España (muestra limitada para CCAA). Realizada en el marco de la Encuesta de Presupuestos Familiares (submuestra telefónica)	Encuesta sobre gasto de los hogares en educación. INE	http://www.ine.es/jaxi/menu.do?type=pcaxis&path=%2Ft13%2Fp460&file=inebase&L=0	Encuesta de Presupuestos Familiares. INE		2007, 2011-12	España			, ,	E	No datos por CCAA ni serie necesaria	Petición de información a medida al INE (con costes de programación y sin asegurar su viabilidad)
			96	Alumnado con retraso en ESO	Porcentaje del alumnado de 15 años en el sistema educativo con retraso acumulado total antes de 4º de la ESO (% del alumnado que alcanza 4º de la ESO con más de 15 años).		Porcentaje	También puede obtenerse el mismo inidicador de retraso en EPO y según titularidad del centro educativo.	Informes anuales (apartados D3.10 de 'La educación secundaria obligatoria'). Las Cifras de la Educación en España. Ministerio de Educación, Cultura y Deporte	http://www.mecd.gob.es/servicios-al-ciudadano-mecd/estadisticas/educacion/indicadores-publicaciones-sintesis/cifras-educacion-espana.html			1996-2012	CCAA	Sí			C	Ficheros Excel independientes para cada año (hojas C1.4). Hay que construir la serie (en ficheros de algunos años vienen 2 ó 3 cursos juntos, se puede aprovechar esto)
			97	Tasa de escolarización no obligatoria (17 años)	Tasa neta de escolarización en edades post-obligatorias en el sistema educativo y formativo (incluye: EE. Rég. General Universitarias y no Universitarias, EE. Rég. Especial (C.F. Artes Plásticas y Diseño, EE. Deportivas, EE. Profesionales de Música y Danza, Idiomas Nivel Avanzado y EE. Artísticas Grado Superior), EE. equivalentes a la E. Universitaria, F. Ocupacional y E. Adultos (Básica y Secund…		Porcentaje	Se ha escogido para los 17 años ya que hay datos para toda la serie, tb hay datos disponibles a los 16 y para los 18 años solo para 2011. Se recomienda este indicador en Europa ya que se pretende que los ciudadanos alcancen un nivel de estudios y formación superior al de la educación obligatoria.	Informes anuales (apartados C1 de 'Escolarización'). Las Cifras de la Educación en España. Ministerio de Educación, Cultura y Deporte	http://www.mecd.gob.es/inee/sistema-indicadores/mapa-indicadores/Mapa-de-indicadores-2010_11_12_14.html y por sexo en http://www.mecd.gob.es/servicios-al-ciudadano-mecd/estadisticas/educacion/indicadores-publicaciones-sintesis/cifras-educacion-espana.html	Sistema Estatal de Indicadores de la Educación, Mapas de indicadores. Ministerio de Educación, Cultura y Deporte		2000-2012	CCAA	Sí			C	Ficheros Excel independientes para cada año (hojas C1.4). Hay que construir la serie (en ficheros de algunos años vienen 2 ó 3 cursos juntos, se puede aprovechar esto)
	PROTOCOLO FIS		98	Tasas de matriculación en ESO	Son tasas de escolarización, las hay por edad (año a año) y por nivel educativo		Porcentaje	Los valores son muy cercanos al 100% en las etapas obligatorias y se presentar los datos año a año. Además puede haber errores por las discrepancias con las cifras reales de población. Aunque se dispone de la serie necesaria, no está construida por lo que hay que acudir a las tablas de indicadores de cada año educativo (apartados de 'Escolarización y población)	Sistema Estatal de Indicadores de la Educación, Mapas de indicadores, y en Las Cifras de la Educación en España (por sexo en 16. 17 y 18 años). Ministerio de Educación, Cultura y Deporte	http://www.mecd.gob.es/inee/sistema-indicadores/mapa-indicadores/Mapa-de-indicadores-2010_11_12_14.html y por sexo en http://www.mecd.gob.es/servicios-al-ciudadano-mecd/estadisticas/educacion/indicadores-publicaciones-sintesis/cifras-educacion-espana.html			2000-2014	CCAA			, ,	S	Se utilizaría la tasa de escolarización no obligatoria (17 años) ID97
	PROTOCOLO FIS		99	Tasas de matriculación en EPO			Porcentaje						2000-2014	CCAA			, ,	S	Se utilizaría la tasa de escolarización no obligatoria (17 años) ID97
			100	Cobertura de educación 0-2 años		Nº de plazas públicas 0-2 años entre la población 0-2 años	Porcentaje											P	Años 2006 y 2011 y por CCAA
			102	Porcentaje Población con instrucción insuficiente	Porcentaje de personas de 16 años o más con nivel de formación alcanzado (según lista del INE): Analfabetos, Educación Primaria, Educación secundaria primera etapa y formación e inserción laboral correspondiente		Porcentaje		Encuesta de Población Activa. INE y EUROSTAT	http://www.ine.es/jaxiT3/Tabla.htm?t=4929			2006-2013	CCAA	Sí		, ,	I
			103	Fracaso escolar	Porcentaje del alumnado que sale de la ESO sin título de graduado en secundaria		Porcentaje		Informes anuales (apartados D3.11 de 'La educación secundaria obligatoria'). Las Cifras de la Educación en España. Ministerio de Educación, Cultura y Deporte	http://www.mecd.gob.es/servicios-al-ciudadano-mecd/estadisticas/educacion/indicadores-publicaciones-sintesis/cifras-educacion-espana.html			2001-2012	CCAA	Sí		Para 2006/07 y años anteriores tb según centro público o privado	C	Ficheros Excel independientes para cada año (hojas D3.9). Hay que construir la serie
Determinantes estructurales de contexto socioeconómico y político relacionados con gobierno y tradición política	ARTÍCULO PÉREZ 2014 GACSAN	GOBIERNO Y TRADICIÓN POLÍTICA	104	Participación electoral	Porcentaje de personas del censo electoral que han votado, incluyendo los votos nulos (no los votos en blanco) en las elecciones al Congreso de los Diputados		Porcentaje		Participación en las elecciones al Congreso de los Diputados (abrir la serie de base). Ministerio del Interior. Barómetro Social de España	http://barometrosocial.es/participacion	Resultados electorales. Ministerio del Interior	http://www.infoelectoral.mir.es/min/home.html	1994-2012	CCAA				C	Tabla en R que habría que transponer para el análisis (para Ceuta y Melilla son los mismos resultados, por lo que tb habría que obtenerlos o bien darlos por perdidos; además se repiten los datos para un mismo periodo electoral). Otra fuente es http://electionresources.org/es/index_es.html donde se pueden descargar en CSV los resultados de cada elección según CCAA y con todos los resultados de par…
			105	Porcentaje de votos a partidos de izquierdas	Porcentaje de personas del censo electoral que han votado a partidos de izquierdas en las elecciones al Congreso de los Diputados		Porcentaje		Resultados electorales. Ministerio del Interior	http://www.infoelectoral.mir.es/min/home.html			1977-2012	CCAA			, ,	C	Hay que descargar las tablas para cada CCAA y calcular el porcentaje. Después fusionarlas y transponerlas para el análisis
			106	Densidad sindical	razón de trabajadores/as sindicados/as sobre el total de trabajadores/as	Trade union density corresponds to the ratio of wage and salary earners that are trade union members, divided by the total number of wage and salary earners (OECD Labour Force Statistics). Density is calculated using survey data, wherever possible, and administrative data adjusted for non-active and self-employed members otherwise. SPAIN: Administrative data based on aggregate membership from UGT…	ESCALA (número)		OECD	http://stats.oecd.org/ (apartado labour – trade union density	ICTWSS database. Amsterdam Institute for Advanced Labour Studies (AIAS)	http://www.uva-aias.net/207	1999-2010	España			, ,	P	No CCAA. Maica buscaría	Tb datos basados en la encuesta del CIS, expuestos en el barómetro social de España, aunque sin resultados para CCAA por muestra insuficiente (http://barometrosocial.es/participacion#wysija ; serie para España 1994-2011 y % de personas afiliadas a sindicatos en relación a la población activa de cada año).
			107	Escaños partidos políticos					Resultados electorales. Ministerio del Interior	http://www.infoelectoral.mir.es/min/home.html			1977-2012	CCAA			, ,	C	Hay que descargar las tablas para cada CCAA y extraer los datos. Después fusionarlas y transponerlas para el análisis
			108	Gobierno					Resultados electorales. Ministerio del Interior	http://www.infoelectoral.mir.es/min/home.html			1977-2012	CCAA				C	Hay que descargar las tablas para cada CCAA y extraer los datos. Después fusionarlas y transponerlas para el análisis
			109	Porcentaje de mujeres con cartera en el gobierno														P	Localizar
			110	Porcentaje de mujeres en el parlamento														P	Pedido a Interior
			111	Mujer en la presidencia del gobierno														P	Localizar
			112	Manifestaciones comunicadas			ESCALA (número)		REUNIÓN Y MANIFESTACIÓN (Tabla 2). Capítulo de Derechos fundamentales. Anuarios Estadísticos del Ministerio del Interior.	http://www.interior.gob.es/documents/642317/1204854/Anuario_estadistico_2012_okkk.pdf/00ee01c7-3122-496a-a023-22829653e6c0			2005-2012	CCAA			, ,	C	Hay que extraer la tabla del PDF del informe de cada año, fusionarlas y adaptarlas para el análisis
			113	Índice de transparencia de las CCAA	80 indicadores de las áreas más importantes que los gobiernos de una comunidad autónoma deberían poner públicamente a disposición de la sociedad		ESCALA (número)		Transparency International España	http://www.transparencia.org.es/INCAU_2014/Evoluci%C3%B3n_puntuaciones_INCAU_2010-2014_.pdf		http://www.transparencia.org.es/	2010, 2012,2014	CCAA			, ,	C	Aunque no se disponen de datos<2010, podría ser interesante. Habría que pasar la tabla del PDF y trasponerla para su análisis
			114	Índice de percepción de corrupción			ESCALA (número)		Transparency International España	http://www.transparencia.org.es/			2002-2012	España			, ,	E	No CCAA
Determinantes estructurales de contexto socioeconómico y político relacionados con políticas del estado de bienestar: vivienda	PROPIA	VIVIENDA Y ALOJAMIENTO	115	Viviendas protegidas, calificaciones definitivas	Viviendas así calificadas o declaradas por el órgano competente de las CCAA que cumplan los requisitos establecidos en la normativa estatal que regula los planes de vivienda, o los establecidos en normativa específica de las CCAA que regula sus propios planes de vivienda, para favorecer el acceso de los ciudadanos a la vivienda.		ESCALA (números absolutos)	Tb disponible nº de solicitudes aunque solo de España. No se incluye rehabilitación protegida (disponible misma serie). Título de la tabla modificado a partir de 2010, anteriormente se titulaba "Número de viviendas protegidas terminadas". (*) Incluye viviendas protegidas de nueva construcción sujetas a distintos regímenes de protección promovidas en el ámbito de planes estatales y autonómicos. Ca…	Series anuales. Ministerio de Fomento	http://www.fomento.gob.es/BE2/?nivel=2&orden=31000000	Barómetro Social de España (no datos por CCAA)	http://barometrosocial.es/vivienda	1991-2013	Provincia			, ,	C	Se ha tenido que retocar la tabla Excel. Hay que trasponer la bd para el análisis
			116	Viviendas libres terminadas	vivienda que no se encuentra sujeta a ningún régimen de protección pública y puede ser transmitida sin restricción entre partes.		ESCALA (números absolutos)	Misma serie disponible para viviendas libres iniciadas	Series anuales. Ministerio de Fomento	http://www.fomento.gob.es/BE2/?nivel=2&orden=32000000			1991-2013	Provincia			, ,	C	Se ha tenido que retocar la tabla Excel. Hay que trasponer la bd para el análisis
			117	Hacinamiento		Residir en viviendas con tres o más personas por dormitorio o menos de 10 metros cuadrados por persona.	Porcentaje		Encuesta Nacional de Salud de España. Ministerio de Sanidad, Servicios Sociales e Igualdad	http://www.msssi.gob.es/estadEstudios/estadisticas/encuestaNacional/home.htm			1987-2012					C	Construir a partir de los microdatos
	ARTÍCULO PÉREZ 2014 GACSAN		118	Porcentaje viviendas protegidas		División entre nº viviendas protegidas y la suma de las protegidas y libres terminadas	Porcentaje		Ministerio de Fomento	http://www.fomento.gob.es/BE2/?nivel=2&orden=32000000			1991-2013	Provincia			, ,	I	Se ha obtenido a partir de ID115 Y ID116 Hay que trasponer la bd para el análisis
	PROPIA		119	Stock acumulado de viviendas nuevas		Stock t = Stock t-1+ VT t, t-1 - VTNSC t, t-1 -VNV t, t-1 Siendo: - Stock t-1 = Stock de viviendas nuevas sin vender en t-1 - VT t, t-1 = Número de viviendas terminadas entre t, t-1 (Certificados de fin de obra) - VTNSC t, t-1 = Número de viviendas terminadas entre t, t-1…que no son susceptibles de ser vendidas en el mercado (viviendas promocionadas por personas físicas, en régimen de cooperativa…	ESCALA (números absolutos)		Ministerio de Fomento	http://www.fomento.gob.es/MFOM/LANG_CASTELLANO/ATENCION_CIUDADANO/INFORMACION_ESTADISTICA/Vivienda/Estadisticas/Stock/default.htm			2005-2013	España			, , Por CCAA y provincia están disponibles los años de 2012 y 2013 con diferencial sobre el stock existente a 1-1-2004	P	Datos según CCAA y serie >=2005
	PROPIA		120	Proporción de stock de viviendas nuevas sobre el parque de viviendas			Porcentaje		Ministerio de Fomento	http://www.fomento.gob.es/MFOM/LANG_CASTELLANO/ATENCION_CIUDADANO/INFORMACION_ESTADISTICA/Vivienda/Estadisticas/Stock/default.htm			2013	España			, , Por CCAA y provincia no está disponible el dato pero sí la pertenencia a una de las categorías (<=2; >2-<=4; >4)	P	Datos según CCAA y serie >=2005
Determinantes intermedios de recursos materiales relacionados con vivienda y situación material	ARTÍCULO PÉREZ 2014 GACSAN		121	Desahucios ingresados en los juzgados	Procedimientos de desahucio de viviendas ingresados en los juzgados de Primera Instancia e Instrucción.	Suma de los procedimientos: "Ejec. Hipotecarias", "Verbales arrendaticios", "Verbales precarios" y desahucios y otros procedimientos arrendaticios	ESCALA (número)	Cambio de criterio clasificatorio en 2001 con la nueva Ley de Enjuiciamiento Civil que a partir de entonces se recoge bajo la rúbrica de "Verbales arrendaticios" y "Verbales precarios". Hay una bajada en número con respecto a los años anteriores, lo que hace pensar que hay que sumar tb las ejecuciones hipotecarias, que se empiezan a incluir a partir de 2001, por eso de incluyen en la suma, aunque…	BBDD ESTADÍSTICA JUDICIAL. Consejo General del Poder Judicial http://www.poderjudicial.es/cgpj/es/Temas/Estadistica_Judicial/Base_de_datos_de_la_estadistica_judicial__PC_AXIS_	http://www6.poderjudicial.es/Selection.aspx?px_tableid=10.-+Juzgados+de+Primera+Instancia+e+Instrucci%u00f3n%5cOUJII007.px&px_language=es&px_type=PX&px_db=10.-+Juzgados+de+Primera+Instancia+e+Instrucci%u00f3n&rxid=d172659f-51b6-4fab-97d0-4e0d3cc0d4a9	Barómetro Social de España (no datos por CCAA)	http://barometrosocial.es/vivienda	1995-2013	Provincia			, , Partido judicial	I	Ha habido que obtener la de España y juntar las de Ceuta y Melilla
			122	Ejecuciones hipotecarias ingresadas en los juzgados	Número de procedimientos ingresados en los Juzgados que permiten exigir el pago de las deudas garantizadas al acreedor con escritura de hipoteca a su favor, debidamente inscrita en el registro de la propiedad. Habitualmente se trata de hipotecas inmobiliarias.		ESCALA (números absolutos)	Antes de 2001 no hay datos, quizás porque se incluían en la rúbrica de desahucios (habría que confirmar con la fuente primaria) Ceuta y Melilla están en diferente órgano judicial (PJUDJ1II, las CCAA en CCAAJ1II)	BBDD ESTADÍSTICA JUDICIAL. Consejo General del Poder Judicial http://www.poderjudicial.es/cgpj/es/Temas/Estadistica_Judicial/Base_de_datos_de_la_estadistica_judicial__PC_AXIS_	http://www6.poderjudicial.es/Selection.aspx?px_tableid=10.-+Juzgados+de+Primera+Instancia+e+Instrucci%u00f3n%5cOUJII007.px&px_language=es&px_type=PX&px_db=10.-+Juzgados+de+Primera+Instancia+e+Instrucci%u00f3n&rxid=d172659f-51b6-4fab-97d0-4e0d3cc0d4a9	Barómetro Social de España (no datos por CCAA)	http://barometrosocial.es/vivienda	2001-2013	Provincia			, , Partido judicial	I	Ha habido que obtener la de España y juntar las de Ceuta y Melilla
			123	Lanzamientos o desalojos forzosos de la vivienda recibidos	Número de lanzamientos o desalojos forzosos de la vivienda que se efectúan como consecuencia del cumplimiento de una orden judicial de desahucio o embargo y se aplican cuando la parte afectada no abandona la vivienda por propia iniciativa. Se recogen los recibidos		ESCALA (números absolutos)	La estadística de lanzamientos del Consejo General del Poder Judicial se registra desde 2008 y sólo se contabilizan los practicados por las comisiones de "servicios comunes de notificaciones y embargos" (integradas por funcionarios judiciales, policía y cerrajero). No hay datos de los lanzamientos realizados por los propios juzgados en las localidades donde no hay "servicios comunes".	BBDD ESTADÍSTICA JUDICIAL. Consejo General del Poder Judicial http://www.poderjudicial.es/cgpj/es/Temas/Estadistica_Judicial/Base_de_datos_de_la_estadistica_judicial__PC_AXIS_	http://www6.poderjudicial.es/Selection.aspx?px_tableid=13.-+Servicios+Comunes+de+Notificaciones+y+Embargos%5cOUSCN002.px&px_language=es&px_type=PX&px_db=13.-+Servicios+Comunes+de+Notificaciones+y+Embargos&rxid=469bffdb-a497-42e6-bfe6-ea3aaef1fd81	Barómetro Social de España (no datos por CCAA)	http://barometrosocial.es/vivienda	2008-2013	CCAA (2013), Provincia (2013), España			, ,	I	Ha habido que obtener la de España y juntar la de Ceuta, no había datos para Melilla
			180	Lanzamientos o desalojos forzosos de la vivienda cumplidos	Número de lanzamientos o desalojos forzosos de la vivienda que se efectúan como consecuencia del cumplimiento de una orden judicial de desahucio o embargo y se aplican cuando la parte afectada no abandona la vivienda por propia iniciativa. Se recogen los devueltos con cumplimiento positivo (cumplidos)		ESCALA (números absolutos)	La estadística de lanzamientos del Consejo General del Poder Judicial se registra desde 2008 y sólo se contabilizan los practicados por las comisiones de "servicios comunes de notificaciones y embargos" (integradas por funcionarios judiciales, policía y cerrajero). No hay datos de los lanzamientos realizados por los propios juzgados en las localidades donde no hay "servicios comunes".	BBDD ESTADÍSTICA JUDICIAL. Consejo General del Poder Judicial http://www.poderjudicial.es/cgpj/es/Temas/Estadistica_Judicial/Base_de_datos_de_la_estadistica_judicial__PC_AXIS_	http://www6.poderjudicial.es/Selection.aspx?px_tableid=13.-+Servicios+Comunes+de+Notificaciones+y+Embargos%5cOUSCN002.px&px_language=es&px_type=PX&px_db=13.-+Servicios+Comunes+de+Notificaciones+y+Embargos&rxid=469bffdb-a497-42e6-bfe6-ea3aaef1fd81	Barómetro Social de España (no datos por CCAA)	http://barometrosocial.es/vivienda	2008-2013	CCAA (2013), Provincia (2013), España			, ,	I	Ha habido que obtener la de España y juntar la de Ceuta, no había datos para Melilla
	PROPIA		124	Retrasos en gastos de vivienda principal (hogares)	Porcentaje de hogares que han tenido retrasos en el pago de gastos relacionados con la vivienda principal (hipoteca o alquiler, recibos de gas, comunidad...) en los últimos 12 meses		Porcentaje	Tb porcentaje de personas (en vez de hogares) tb vienen datos para 'no poder permitirse vacaciones' y 'no poder afrontar gastos imprevistos'	Encuesta de condiciones de vida. Evolución (2004-2013) de la carencia material por CCAA.	http://www.ine.es/jaxi/tabla.do?path=/t25/p453/provi/l0/&file=01003.px&type=pcaxis&L=0			2004-2013	CCAA				I
	PROPIA		125	Personas >16 años que viven en hogares multipersonales que no forman familia (personas que comparten hogar)			Porcentaje	Se decide coger personas en vez de hogares ya que el análisis en las ENS será según personas. AUNQUE en el Censo 2001 se hace referencia a personas que residen en viviendas familiares, mientras que en el Censo 2011 son residentes en viviendas principales, se está considerando la misma población (consulta realizada al INE)	Censo de población y viviendas	CENSO 2011 EN http://www.ine.es/censos2011/tablas/Inicio.do CENSO 2001 EN http://www.ine.es/censo/es/seleccion_ambito.jsp			2001.2	CCAA	Sí			I
	PROPIA		126	Personas de 25-39 años que conviven con su madre/padre			Porcentaje		Censo de población y viviendas	CENSO 2011 EN http://www.ine.es/censos2011/tablas/Inicio.do CENSO 2001 EN http://www.ine.es/censo/es/seleccion_ambito.jsp			2001.2	CCAA	Sí			I
			183	Personas en hogares con 3 ó más generaciones			Porcentaje		Censo de población y viviendas	CENSO 2011 EN http://www.ine.es/censos2011/tablas/Inicio.do CENSO 2001 EN http://www.ine.es/censo/es/seleccion_ambito.jsp			2001.2	CCAA				I
			182	Hogares con pareja o padre/madre con todos los hijos mayores de 25 años			Porcentaje		Censo de población y viviendas	CENSO 2011 EN http://www.ine.es/censos2011/tablas/Inicio.do CENSO 2001 EN http://www.ine.es/censo/es/seleccion_ambito.jsp			2001.2	CCAA				P	Falta dato 2001, solicitado al INE, y fusionarlo con 2011
	PROPIA		127	Personas >16 años que viven en hogares unipersonales			Porcentaje	Se considera hogar al conjunto de personas que residen habitualmente en la misma vivienda. Las diferencias entre hogar y familia son: a) El hogar puede ser unipersonal, mientras que la familia tiene que constar, por lo menos, de dos miembros. b) Los miembros de un hogar multipersonal no tienen necesariamente que estar emparentados, mientras que los miembros de una familia sí.	Censo de población y viviendas	CENSO 2011 EN http://www.ine.es/censos2011/tablas/Inicio.do CENSO 2001 EN http://www.ine.es/censo/es/seleccion_ambito.jsp			2001.2	CCAA	Sí		Filtrando se puede obtener otros grupos de edad	I		También disponible (en estructura del hogar) según mayores o menores de 65 años (y sexo)
	PROPIA		128	Núcleo familiar monomarental	Porcentaje de hogares con madres con uno o más hijos		Porcentaje	El núcleo es la unidad jerárquica intermedia entre el habitante y la familia. Puede ser: pareja sin hijos, pareja con uno o más hijos, padre con uno o más hijos, y madre con uno o más hijos. Para formar parte del núcleo familiar de sus padres, los hijos deben estar solteros, no estar emparejados ni tener hijos.	Censo de población y viviendas	CENSO 2011 EN http://www.ine.es/censos2011/tablas/Inicio.do CENSO 2001 EN http://www.ine.es/censo/es/seleccion_ambito.jsp			2001.2	CCAA				I		También disponible (en estructura del hogar) aquellos hogares donde la madre convive con algún hijo menor de 25 años o con todos >25 años
	PROPIA		181	Núcleo familiar monoparental	Porcentaje de hogares con padres con uno o más hijos		Porcentaje	El núcleo es la unidad jerárquica intermedia entre el habitante y la familia. Puede ser: pareja sin hijos, pareja con uno o más hijos, padre con uno o más hijos, y madre con uno o más hijos. Para formar parte del núcleo familiar de sus padres, los hijos deben estar solteros, no estar emparejados ni tener hijos.	Censo de población y viviendas	CENSO 2011 EN http://www.ine.es/censos2011/tablas/Inicio.do CENSO 2001 EN http://www.ine.es/censo/es/seleccion_ambito.jsp			2001.2	CCAA				I		También disponible (en estructura del hogar) aquellos hogares donde el padre convive con algún hijo menor de 25 años o con todos >25 años
	ARTÍCULO PÉREZ 2014 GACSAN		129	Índice de esfuerzo de la compra de vivienda para un hogar medio	Porcentaje de la renta del hogar que suponen las cuotas a pagar en el primer año tras la adquisición de un préstamo hipotecario por el 80 por ciento del valor del piso y una vez descontadas las deducciones fiscales correspondientes a dicha compra (media de los cuatro trimestres de cada año).		Porcentaje		Encuesta Financiera de las Familias. Banco de España	No localizada. En http://www.bde.es/webbde/es/estadis/infoest/sindi.html están los indicadores pero no coinciden con los del barómetro y la bd ofrecida	Barómetro Social de España (no datos por CCAA)	http://barometrosocial.es/vivienda	1994-2013	España			, ,	E	Respuesta del BDE: No se facilitan desgloses por CCAA ya que la muestra sólo es representativa, a través de los pesos facilitados, a nivel nacional pero no a nivel más desagregado. Este problema es especialmente relevante en el caso de la EFF cuya muestra está marcadamente estratificada por riqueza.
Determinantes intermedios de recursos materiales relacionados con entorno residencial	ARTÍCULO PÉREZ 2014 GACSAN		130	Problemas en el entorno de la vivienda		"Preguntas de: 1. El ruido procedente del exterior de su vivienda le resulta molesto; 2. Sufre malos olores procedentes del exterior; 3. El agua de consumo es de mala calidad; 4. Poca limpieza en las calles; 5. Contaminación del aire elevada provocada por alguna industria cercana; 6 Contaminación del aire elevada por otras causas; 7. Escasez de zonas verdes; 8. Presencia de animales que causan im…	Porcentaje		Encuestas Nacionales de Salud 2006 y 2011. INE.	http://www.ine.es/jaxi/tabla.do?path=/t15/p419/a2006/p06/l0/&file=02003.px&type=pcaxis&L=0 y http://www.ine.es/jaxi/tabla.do?path=/t15/p419/a2011/p06/l0/&file=06179.px&type=pcaxis&L=0			2006, 2011	CCAA	Sí			C	Construir a partir de las ENS
Determinantes estructurales de contexto socioeconómico y político relacionados con políticas del estado de bienestar: dependencia	PROPIA	SERVICIOS SOCIALES	131	Solicitudes registradas para dependencia			ESCALA (números absolutos)	Cada año tiene su información que suele compararla con el año anterior, aunque no de manera sistemática ni siguiendo los mismos criterios para todos los años, por lo que dificultará y limitará la validez de los indicadores construidos para la serie. El Real Decreto-ley 20/2011, de 30 de diciembre, ha introducido modificaciones en la disposición final primera de la Ley de Dependencia, relativa a l…	Portal SAAD. IMSERSO	http://www.dependencia.imserso.es/dependencia_01/documentacion/estadisticas/est_inf/inf_gp/index.htm	Ministerio de Sanidad, Servicios Sociales e Igualdad. Estadísticas del IMSERSO	http://www.imserso.es/imserso_01/documentacion/estadisticas/index.htm	2008-2014	CCAA	Sí	Sí	, ,	C	Extraer de cada año (no hay series disponibles)
	PROPIA		132	Solicitudes registradas para dependencia en relación a la población de las CCAA			Porcentaje						2008-2014	CCAA			, ,	C	Extraer de cada año (no hay series disponibles). Coger 2008 y 2012
	PROPIA		133	Proporción de valoraciones de dependencia no realizadas (no dictámenes)		Complementario de los dictámenes	Porcentaje						2008-2014	CCAA				C	Extraer de cada año (no hay series disponibles). Coger 2008 y 2012
	ARTÍCULO PÉREZ 2014 GACSAN		134	Personas beneficiarias con efectividad del derecho a prestación por dependencia			ESCALA (números absolutos)						2008-2014	CCAA	Sí	Sí	, ,	C	Extraer de cada año (no hay series disponibles). Coger 2008 y 2012
			135	Personas beneficiarias con efectividad del derecho a prestaciones de dependencia en relación a la población de las CCAA			Porcentaje						2009-2014	CCAA			, ,	C	Extraer de cada año (no hay series disponibles). Coger 2009 y 2012
			136	Proporción de beneficiarios con efectividad del derecho a prestaciones por dependencia respecto a dictámenes (solicitudes valoradas)			Porcentaje						2008-2014	CCAA			, ,	C	Extraer de cada año (no hay series disponibles). Coger 2009 y 2012
	PROPIA		137	Proporción de personas valoradas no dependientes (sin grado) con respecto a dictámenes			Porcentaje						2008-2014	CCAA				C	Extraer de cada año (no hay series disponibles). Coger 2009 y 2012
	PROPIA		138	Proporción de personas valoradas y pendientes de efectividad del derecho a prestación con respecto a dictámenes		(Dictámenes - beneficiarios con efectividad del derecho a prestaciones por dependencia - personas valoradas no dependientes (sin grado)) / dictámenes							2008-2014	CCAA				C	Extraer de cada año (no hay series disponibles) y calcular. Coger 2009 y 2012
	Amaia y Unai		139	Proporción de personas beneficiarias con efectividad del derecho a prestación pendientes de la concesión respecto a beneficiarios con efectividad (LIMBO)		(Beneficiarios con efectividad del derecho a prestaciones por dependencia - beneficiarios con prestaciones concedida) / Beneficiarios con efectividad del derecho a prestaciones por dependencia	Porcentaje						2009-2014	CCAA				C	Extraer de cada año (no hay series disponibles) y calcular. Coger 2009 y 2012
	ARTÍCULO PÉREZ 2014 GACSAN		140	Tipo de Prestaciones por dependencia	servicios de apoyo al cuidado (prevención dependencia y promoción autonomía personal, ayuda a domicilio, teleasistencia, atención residencial, centros día/noche, otros) y prestaciones económicas (cuidados familiares, asistencia personal y vinculadas al servicio). Existe el mismo dato pero agrupado por prestaciones económicas para cuidados familiares y por el resto de servicios		Porcentaje						2008-2014	CCAA			, ,	NP	Difícil de manejar. Quizás se podría utilizar la otra agrupación
	PROPIA		141	Ratio de presentaciones para dependencia por persona beneficiaria			ESCALA (números)						2009-2014	CCAA			, ,	C	Extraer de cada año (no hay series disponibles). Coger 2009 y 2012
	PROPIA		142	Camas para cuidados de larga duración	Camas disponibles por 100.000 habitantes en instalaciones para cuidados residenciales, enfermería, supervisión, etc., para personas que requieren cuidados de enfermería y seguimiento de salud debido a enfermedades crónicas y a un reducido grado de independencia de actividades de la vida diaria. El cuidado es proporcionado por servicios sociales y sanitarios.		Tasa (100.000 hab)		EUROSTAT	http://appsso.eurostat.ec.europa.eu/nui/show.do?query=BOOKMARK_DS-194309_QID_2B87DD4C_UID_-3F171EB0&layout=TIME,C,X,0;GEO,L,Y,0;UNIT,C,Z,0;FACILITY,L,Z,1;INDICATORS,C,Z,2;&zSelection=DS-194309FACILITY,NRCBED;DS-194309INDICATORS,OBS_FLAG;DS-194309UNIT,P_HTHAB;&rankName1=UNIT_1_2_-1_2&rankName2=INDICATORS_1_2_-1_2&rankName3=FACILITY_1_2_-1_2&rankName4=TIME_1_0_0_0&rankName5=GEO_1_2_0_1&sortC=ASC_-1…			2002-2010	CCAA				I
	PROPIA		143	Importe medio de prestaciones sociales y económicas de la LISMI (Ley de Integración Social de los Minusválidos)	La cantidad total incluye subsidios de: GARANTÍA INGRESOS MÍNIMOS, AYUDA TERCERA PERSONA y MOVILIDAD GASTOS TRANSPORTE (tb se dispone de datos para estos conceptos)	Importe medio anual en Euros/mes	Euros		V. Prestaciones No Contributivas (PNC-17). Anuario de Estadísticas. Ministerio de Empleo y Seguridad Social	http://www.empleo.gob.es/es/estadisticas/contenidos/anuario.htm			2001-2013	CCAA, provincias			, ,	C	Datos en Excel para cada año que hay que seleccionar, fusionar y posteriormente transponer Solicitada serie y CCAA en mismo fichero a MEYSS con respuesta de no disponible
	PROPIA		144	Proporción de prestaciones sociales y económicas denegadas para personas con discapacidad entre las solicitudes resueltas	Considera subsidio de movilidad y compensación para gastos de transporte, asistencia sanitaria y prestación farmacéutica (tb disponible en cada concepto)	Serie 2007-2013: nº prestaciones denegadas (pág 201, Anexo 174) / nº prestaciones resueltas (pág 189, Anexo 162) Serie 2004-2010: nº prestaciones denegadas (pág 202, Anexo 174) / nº prestaciones resueltas (pág 190, Anexo 162)	ESCALA (número)	Tb disponible solicitudes presentadas (pág. 183 ó Anexo 156), aprobadas, pendientes y revisiones	IMSERSO. Prestaciones Sociales y Económicas para personas con discapacidad. Evolución de la Gestión 2007-2013	http://www.imserso.es/InterPresent2/groups/imserso/documents/binario/evolges20072013.pdf	IMSERSO. Prestaciones Sociales y Económicas para personas con discapacidad	http://www.imserso.es/imserso_01/documentacion/estadisticas/prestaciones_sociales_economicas_lismi/index.htm	2004-2013	CCAA, provincias				C	Hay que extraer datos del PDF. La serie 2004-2010 está en http://sid.usal.es/idocs/F8/FDO25880/imserso-evolucionpensiones20042010-01.pdf Solicitada serie y CCAA en mismo fichero a MEYSS, con respuesta de no disponible
Determinantes estructurales de contexto socioeconómico y político relacionados con políticas del estado de bienestar: protección social	PROTOCOLO FIS		145	Gasto en prestaciones de protección social (En porcentaje del PIB a precios de mercado)		Los datos encontrados corresponden a España, en http://www.empleo.gob.es/es/estadisticas/contenidos/anuario.htm	PORcentaje	Tb desglose en Función "Enfermedad, Atención sanitaria", "Invalidez", "Vejez", "Supervivencia", "Familia, Hijos", "Desempleo", "Vivienda", "Exclusión social". Además con GASTOS ADMINISTRATIVOS y OTROS GASTOS	V. Cuentas Integradas de Protección Social en términos SEEPROS (CPS-12). Anuario de Estadísticas. Ministerio de Empleo y Seguridad Social	http://www.empleo.gob.es/es/estadisticas/contenidos/anuario.htm			2001-2013	España			, ,	NP	Solicitada serie y CCAA en mismo fichero a MEYSS con respuesta: no hay datos desagregados por Comunidad Autónoma, dado que los datos de las Cuentas Integradas de Protección Social en términos SEEPROS se corresponden a los datos de protección social de España, siguiendo la metodología y los reglamentos aprobados por la Unión Europea, para la elaboración de un Sistema Europeo de Estadísticas Integr…
			146	Importe medio de pensiones contributivas del Sistema de la Seguridad Social		Importe medio anual en Euros/mes	Euros		V. Pensiones Contributivas del Sistema de la Seguridad Social (PEN-23). Anuario de Estadísticas. Ministerio de Empleo y Seguridad Social	http://www.empleo.gob.es/es/estadisticas/contenidos/anuario.htm			2001-2013	CCAA			, ,	C	Datos en Excel para cada año que hay que seleccionar, fusionar y posteriormente transponer Solicitada serie y CCAA en mismo fichero a MEYSS con respuesta de no disponible	Ver tb en Agencia Tributaria (datos de 2013) http://www.agenciatributaria.es/AEAT/Contenidos_Comunes/La_Agencia_Tributaria/Estadisticas/Publicaciones/sites/mercado/2013/home_parcialf4996115aa5cfc6ab7baab6eff8c0f865f8cd2fc4.html
	PROPIA		147	Proporción de pensiones no contributivas denegadas entre las solicitudes resueltas	Considera tanto las de jubilación como las de invalidez (tb disponible en cada concepto)	nº solicitudes denegadas pág. 94 (serie 2004-2010) y 93 (2007-2013) / Nº de solicitudes resueltas pág. 88 (serie 2004-2010) y 87 (2007-2013)	ESCALA (número)	Tb disponible en solicitudes presentadas, aprobadas, pendientes y caducadas o desistidas)	IMSERSO. Prestaciones Sociales y Económicas para personas con discapacidad. Evolución de la Gestión 2007-2013	http://www.imserso.es/InterPresent2/groups/imserso/documents/binario/evolges20072013.pdf	IMSERSO. Prestaciones Sociales y Económicas para personas con discapacidad	http://www.imserso.es/imserso_01/documentacion/estadisticas/prestaciones_sociales_economicas_lismi/index.htm	2007-2013	CCAA, provincias				C	Hay que extraer datos del PDF. La serie 2004-2010 está en http://sid.usal.es/idocs/F8/FDO25880/imserso-evolucionpensiones20042010-01.pdf Solicitada serie y CCAA en mismo fichero a MEYSS, con respuesta de no disponible
	PROPIA		148	Gasto prestaciones protección social per cápita		A precios constantes de 2005	Euros	Unidad tb disponible sin ajustar a precios constantes, el poder adquisitivo estándar per cápita, total, como % del PIB, del total de prestaciones y del total de gasto. Otros indicadores disponibles como costes de administración, discapacidad, vejez, familias/niños, desempleo, enfermedad, exclusión social, vivienda....	European System of Integrated Social Protection Statistics (ESSPROS). EUROSTAT	http://appsso.eurostat.ec.europa.eu/nui/show.do?query=BOOKMARK_DS-053608_QID_-316503B6_UID_-3F171EB0&layout=TIME,C,X,0;GEO,L,Y,0;SPDEPS,L,Z,0;UNIT,L,Z,1;INDICATORS,C,Z,2;&zSelection=DS-053608INDICATORS,OBS_FLAG;DS-053608UNIT,EUR_HAB;DS-053608SPDEPS,TOTALNOREROUTE;&rankName1=SPDEPS_1_2_-1_2&rankName2=INDICATORS_1_2_-1_2&rankName3=UNIT_1_2_-1_2&rankName4=TIME_1_0_0_0&rankName5=GEO_1_2_0_1&sortC=ASC…	EUROSTAT	http://epp.eurostat.ec.europa.eu/portal/page/portal/social_protection/introduction	2000-2012	País				NP	Solicitada serie y CCAA en mismo fichero a MEYSS con respuesta: no hay datos desagregados por Comunidad Autónoma, dado que los datos de las Cuentas Integradas de Protección Social en términos SEEPROS se corresponden a los datos de protección social de España, siguiendo la metodología y los reglamentos aprobados por la Unión Europea, para la elaboración de un Sistema Europeo de Estadísticas Integr…
	PROPIA		149	Prestación media anual por desempleo			Euros		Estadística del MERCADO DE TRABAJO Y PENSIONES EN LAS FUENTES TRIBUTARIAS. Agencia Tributaria	http://www.agenciatributaria.es/AEAT/Contenidos_Comunes/La_Agencia_Tributaria/Estadisticas/Publicaciones/sites/mercado/2013/jrubikfeecd4f74630fff5cde2e615f1c9ee6100abd559.html	Estadística del MERCADO DE TRABAJO Y PENSIONES EN LAS FUENTES TRIBUTARIAS. Agencia Tributaria	http://www.agenciatributaria.es/AEAT.internet/datosabiertos/catalogo/hacienda/Mercado_de_Trabajo_y_Pensiones_en_las_Fuentes_Tributarias.shtml	1992-2013	España, CCAA, provincia	Sí		Sexo*nacionalidad (española, extranjera)	C	Los informes son anuales, por lo que hay que construir la serie. Además las tablas de las variables de segmentación son independientes por lo que tb hay que fusionarlas manualmente Solicitada serie por CCAA y sexo al MEYSS, con respuesta de no disponible
	PROPIA		150	Gasto pensiones per cápita	Prestación económica para pensiones per cápita	A precios constantes de 2005	Euros	Unidad tb disponible el poder adquisitivo estándar per cápita, total, como % del PIB. Otros indicadores disponibles son pensiones por edad, anticipada, parcial, por discapacidad...	European System of Integrated Social Protection Statistics (ESSPROS). EUROSTAT	http://appsso.eurostat.ec.europa.eu/nui/show.do?query=BOOKMARK_DS-053606_QID_12E42BB4_UID_-3F171EB0&layout=TIME,C,X,0;GEO,L,Y,0;SPDEPB,L,Z,0;SPDEPM,L,Z,1;UNIT,L,Z,2;INDICATORS,C,Z,3;&zSelection=DS-053606SPDEPM,TOTAL;DS-053606INDICATORS,OBS_FLAG;DS-053606SPDEPB,TOTAL;DS-053606UNIT,EUR_HAB_KP05;&rankName1=SPDEPM_1_2_-1_2&rankName2=SPDEPB_1_2_-1_2&rankName3=INDICATORS_1_2_-1_2&rankName4=UNIT_1_2_-1_…	EUROSTAT	http://epp.eurostat.ec.europa.eu/portal/page/portal/social_protection/introduction	2000-2012	País				E	Solicitada serie y CCAA al MEYSS, con respuesta de no disponible
	PROPIA		151	Robos domésticos	Acceder al alojamiento usando la fuerza para robar		ESCALA (número)	También disponible Homicide, Robbery y Motor vehicle theft	EUROSTAT	http://appsso.eurostat.ec.europa.eu/nui/show.do?query=BOOKMARK_DS-336613_QID_244AC84A_UID_-3F171EB0&layout=TIME,C,X,0;GEO,L,Y,0;UNIT,L,Z,0;CRIM,L,Z,1;INDICATORS,C,Z,2;&zSelection=DS-336613INDICATORS,OBS_FLAG;DS-336613CRIM,DBURG;DS-336613UNIT,NR;&rankName1=CRIM_1_2_-1_2&rankName2=INDICATORS_1_2_-1_2&rankName3=UNIT_1_2_-1_2&rankName4=TIME_1_0_0_0&rankName5=GEO_1_2_0_1&pprRK=FIRST&pprSO=PROTOCOL&ppc…			2008-2010	CCAA				E	No serie necesaria
Determinantes estructurales de contexto socioeconómico y político relacionados con políticas del estado de bienestar: servicios sociales	PROPIA		152	Protección a la infancia: tutela y acogimiento	Tasa de incidencia de nuevas resoluciones de acogimiento familiar judicial:medidas por cada 100.000 hab<18 años Tb disponible valor absoluto		Tasa (100.000 hab<18 años)	Las tasas de incidencia están calculadas como el tanto por cien mil sobre la población menor de 18 años de cada comunidad. Para 2001 según el censo de 2001, de 2002 en adelante tomando este dato de las proyecciones de población por comunidades autónomas del INE para cada año a fecha de 1 de julio. A partir del año 2005, la variable Altas de Acogimiento familiar judicial es susituida por las Nueva…	INEbase	http://www.ine.es/jaxi/tabla.do?path=/t25/a072/a02/l0/&file=c70002.px&type=pcaxis&L=0		http://www.ine.es/jaxi/menu.do?type=pcaxis&path=%2Ft25%2Fa072%2F&file=inebase&L=0	2001-2011	CCAA				I		Tb datos sobre atlas de tutelas 'ed lege', de acogimiento residencia y de acogimiento familitar administrativo
	XAVIER BARTOLL		153	Gasto público corriente en Servicios Sociales y Promoción Social	CLASIFICACIÓN FUNCIONAL DE LA LIQUIDACIÓN DE LOS PRESUPUESTOS DEPURADOS IFL y PAC. Datos consolidados.	Se considera la suma de los capítulos de gasto 1 (personal), 2 (bienes y servicios) y 4 (transferencias corrientes) ya que son los gastos corrientes (recibe el ciudadano). Los capítulos 6 y 7 son inversiones y transferencias de capital. 8 y 9 son variaciones de avales y amortizacion de deuda. Como la inversion, 6 y 7, puede fluctuar de un año a otro y tiene efectos a medio plazo, no se considera …	Euros	No se ha considerado 2002-2005 ya que cambia el desglose funcional. El tipo de importe depurado de IFL (Intermediación Financiera Local) y ayudas PAC (Política Agraria Comunitaria) no está disponible para 2006 y años anteriores, por lo que se considera importe sin depurar. En ambos casos, las CC.AA actúan como meras intermediarias de los fondos percibidos. El primer análisis de políticas públicas…	Liquidación de presupuestos de CCAA. Ministerio de Hacienda y Administraciones Públicas.	http://serviciosweb.meh.es/Apps/Publicacionliquidacion/aspx/menuInicio.aspx			2006-2012	CCAA				C	Sumar capítulos 1, 2 y 4	Valorar construir el per cápita. Valorar utilizar tb inversiones reales y transferencias de capital
	Amaia y Unai		154	Gasto público en tercer sector de acción social			Millones Euros		La Caixa	http://obrasocial.lacaixa.es/deployedfiles/obrasocial/Estaticos/pdf/Convocatorias/informe_tercer_sector_2013.pdf			2010-2012	España				P	AMAIA Y UNAI recogerán por CCAA
	PROTOCOLO FIS		155	Gasto público per cápita (porcentaje del PIB) en servicios sociales			ESCALA (importe en miles de euros)		Anuario de Estadísticas. Ministerio de Empleo y Seguridad Social	http://www.empleo.gob.es/es/estadisticas/contenidos/anuario.htm	Contabilidad Regional de España. INE	http://www.ine.es/jaxi/menu.do?type=pcaxis&path=%2Ft35/p010&file=inebase&L=0	2001-2013	España			, ,	E	Solicitada serie y CCAA al MEYSS, con respuesta de no disponible
Determinantes intermedios de recursos materiales relacionados con trabajo doméstico y de cuidados	ARTÍCULO PÉREZ 2014 GACSAN	CUIDADOS	156	Menores de 3 años cuidados sólo por su familia (padre y madre)		Porcentaje de menores de 3 años atendidos sólo por su familia (padre y madre), respecto al total de menores de 3 años	Porcentaje		The European Union Statistics on Income and Living Conditions (EU-SILC), Eurostat	http://appsso.eurostat.ec.europa.eu/nui/submitViewTableAction.do			2005-2012	Países, Europa			, ,	E	No CCAA
	PROPIA		157	Nº prestaciones económicas de dependencia para cuidados en el entorno familiar			ESCALA (número)		Portal SAAD. IMSERSO	http://www.dependencia.imserso.es/dependencia_01/documentacion/estadisticas/est_inf/inf_gp/index.htm	Ministerio de Sanidad, Servicios Sociales e Igualdad. Estadísticas del IMSERSO	http://www.imserso.es/imserso_01/documentacion/estadisticas/index.htm	2009-2014	CCAA				P	Solicitada serie y CCAA al MEYSS
	PROPIA		158	Proporción de prestaciones económicas para cuidados en el entorno familiar respecto al total de prestaciones de dependencia			Porcentaje		Portal SAAD. IMSERSO	http://www.dependencia.imserso.es/dependencia_01/documentacion/estadisticas/est_inf/inf_gp/index.htm	Ministerio de Sanidad, Servicios Sociales e Igualdad. Estadísticas del IMSERSO	http://www.imserso.es/imserso_01/documentacion/estadisticas/index.htm	2009-2014	CCAA				P	Solicitada serie y CCAA al MEYSS
	PROPIA		159	Proporción de hogares con algún miembro con discapacidad o limitación que requiera cuidados			Porcentaje		Encuesta Nacional de Salud de España. Ministerio de Sanidad, Servicios Sociales e Igualdad	http://www.msssi.gob.es/estadEstudios/estadisticas/encuestaNacional/home.htm			1987-2012	CCAA				C	Construir a partir de los microdatos ENS
Determinantes estructurales de contexto socioeconómico y político relacionados con cultura y valores: cohesión social	ARTÍCULO PÉREZ 2014 GACSAN	CULTURA Y VALORES	160	Confianza en la mayoría de la gente	La pregunta es: ¿Diría Ud. que, por lo general, se puede confiar en la mayoría de la gente, o que nunca se es lo bastante prudente en el trato con los demás? Por favor, sitúese en una escala de 0 a 10, en la que el 0 significa 'nunca se es lo bastante prudente' y el 10 que 'se puede confiar en la mayoría de la gente'.		Porcentaje, media	La encuesta no tiene muestra suficiente en algunas CCAA como para proporcionar datos fiables	Búsqueda avanzada de estudios. CIS	http://www.analisis.cis.es/cisdb.jsp	Barómetros del CIS	http://www.cis.es/cis/opencm/ES/11_barometros/index.jsp	1996-2014	España, CCAA			, ,	C	Las series están disponibles para España (Serie F.1.01.01.037 para 2000-2013 y Serie F.1.03.01.011 para 1996-2006, tienen resultados diferentes), desde ahí se pueden identificar las preguntas para cada encuesta. La serie por CCAA se puede construir mediante consultas individuales en búsquedas avanzadas de estudios en http://www.analisis.cis.es/cisdb.jsp. Después de identificar los estudios donde …
	PROPIA		184	Satisfacción con la vida personal	Pregunta "En términos generales, ¿en qué medida diría Ud. que está satisfecho/a con su vida?" con respuestas de "Muy satisfecho, bastante satisfecho, no muy satisfecho, nada satisfecho"		Porcentaje	Incluida anualmente a partir de 2007. La encuesta no tiene muestra suficiente en algunas CCAA como para proporcionar datos fiables	Búsqueda avanzada de estudios. CIS	http://www.analisis.cis.es/cisdb.jsp			2007-2013	España, CCAA				C	En la Serie F.1.01.01.037 aparecen el código de variables para cada encuesta en la que se introdujo. Para construir hay que seguir los pasos del ID160
	PROPIA		161	Felicidad general	La pregunta es: En términos generales, ¿en qué medida se considera Ud. una persona feliz o infeliz? Por favor, use una escala de 0 a 10, en la que 0 significa que se considera "completamente infeliz" y 10 que se considera "completamente feliz".		Porcentaje, media	Incluida en los barómetros desde junio de 2013. La encuesta no tiene muestra suficiente en algunas CCAA como para proporcionar datos fiables En 2002 y 2008 (estudio 2442 y 2777) se incluyó el grado de felicidad personal pero como categórica (Muy feliz, Bastante feliz, Ni feliz ni desgraciado, Bastante desgraciado y Muy desgraciado) y en 2012 (estudio 2947 del ISSP) como "Completamente feliz, Muy …	Búsqueda avanzada de estudios. CIS	http://www.analisis.cis.es/cisdb.jsp	Barómetros del CIS	http://www.cis.es/cis/opencm/ES/11_barometros/index.jsp	2013-2014	España, CCAA			, ,	E	No serie disponible (Serie F.1.01.01.039)
Determinantes estructurales de contexto socioeconómico y político relacionados con cultura y valores: participación en la comunidad (cultural, deportiva, religiosa o espiritual)	ARTÍCULO PÉREZ 2014 GACSAN		162	Situación de pertenencia y participación en un partido político	La pregunta es: Teniendo en cuenta una serie de asociaciones y grupos, dígame si pertenece y participa activamente, si pertenece pero no participa activamente, o si ha pertenecido y participado en los últimos doce meses pero en la actualidad no pertenece, o si nunca ha pertenecido a...		Porcentaje	No está incluida en todas las encuestas realizadas y no hay series construidas o resultados anuales. La encuesta no tiene muestra suficiente como para proporcionar datos fiables por CCAA. Otras organizaciones o asociaciones; sindicato; colegio profesional; Asociaciones de empresarios/as; asociación de caridad o ayuda social; club o asociación deportiva; grupo cultural o de ocio; organización ecol…	Búsqueda avanzada de estudios. CIS	http://www.analisis.cis.es/cisdb.jsp	Barómetros del CIS	http://www.cis.es/cis/opencm/ES/11_barometros/index.jsp	2004-2014	España, CCAA			, ,	C	En la Serie A.3.05.02.026 aparecen el código de variables para cada encuesta en la que se introdujo. Para construir hay que seguir los pasos del ID160
Determinantes demográficos	PROPIA	DEMOGRAFÍA	187	Población residente en España	a 1 de julio de cada año		ESCALA (número)		Cifras de población y censos demográficos. Serie desde 2002. INE	http://www.ine.es/jaxi/tabla.do?path=/t20/p321/serie/2001/l0/&file=02001.px&type=pcaxis&L=0			2002-	CCAA	Sí	Año a año		C	Obtener la bd del INE y hacer en R
	PROTOCOLO FIS		163	Población mayor de 65 años			Porcentaje		Cifras de población y censos demográficos. INE	http://www.ine.es/inebmenu/indice.htm#6			-2014	CCAA,Países, Europa	Sí	año nacimiento, grupos quinquenales de edad	, País de origen,Nacionalidad, Municipios	I		Construir con respecto a la población total para obtener indicador de Envejecimiento
			164	Población menor de 15 años			Porcentaje		Cifras de población y censos demográficos. INE	http://www.ine.es/inebmenu/indice.htm#6			-2014	CCAA,Países, Europa	Sí	año nacimiento, grupos quinquenales de edad	, País de origen,Nacionalidad, Municipios	I
			165	Densidad de población	Razón entre la población (anual media) de una región y el área (tierra) de la región		ESCALA (número)		EUROSTAT	http://appsso.eurostat.ec.europa.eu/nui/show.do?query=BOOKMARK_DS-115323_QID_-159C142A_UID_-3F171EB0&layout=TIME,C,X,0;GEO,L,Y,0;INDICATORS,C,Z,0;&zSelection=DS-115323INDICATORS,OBS_FLAG;&rankName1=TIME_1_0_0_0&rankName2=GEO_1_2_0_1&rankName3=INDICATORS_1_2_-1_2&ppcRK=FIRST&ppcSO=ASC&sortC=ASC_-1_FIRST&rStp=&cStp=&rDCh=&cDCh=&rDM=true&cDM=true&footnes=false&empty=false&wai=false&time_mode=ROLLING…			2002-2012	Provincia, CCAA,Países, Europa				I
			166	Indicador Coyuntural de Fecundidad	Nº medio de hijos por mujer		ESCALA (número)		Indicadores demográficos básicos.Natalidad y Fecundidad. INE	http://www.ine.es/jaxiT3/Tabla.htm?t=1441			1975-2013	CCAA			orden del nacimiento y nacionalidad (española/extranjera) de la madre	I
			167	Esperanza de vida al nacimiento	Número medio de años que se espera que un individuo viva desde el momento de su nacimiento, si se mantiene el patrón de la mortalidad del periodo observado.		ESCALA (número)		Indicadores demográficos básicos.Mortalidad. INE	http://www.ine.es/jaxiT3/Tabla.htm?t=1448	EUROSTAT (año a año)	http://appsso.eurostat.ec.europa.eu/nui/show.do?query=BOOKMARK_DS-115339_QID_1A66FA_UID_-3F171EB0&layout=TIME,C,X,0;GEO,L,Y,0;SEX,L,Z,0;AGE,L,Z,1;INDICATORS,C,Z,2;&zSelection=DS-115339INDICATORS,OBS_FLAG;DS-115339AGE,Y_LT1;DS-115339SEX,T;&rankName1=AGE_1_2_-1_2&rankName2=INDICATORS_1_2_-1_2&rankName3=SEX_1_2_-1_2&rankName4=TIME_1_0_0_0&rankName5=GEO_1_2_0_1&sortC=ASC_-1_FIRST&rStp=&cStp=&rDCh=&cD…	1991-2013	CCAA	Sí	Año a año (Eurostat)	Los datos de España están en http://www.ine.es/jaxiT3/Tabla.htm?t=1414	I		Datos para España (y países europeos en http://goo.gl/0QDFMn)
			168	Esperanza de vida a los 65 años	Número medio de años de vida futura a partir de la edad x, si se mantiene el patrón de la mortalidad del periodo observado.		ESCALA (número)		Indicadores demográficos básicos.Mortalidad. INE	http://www.ine.es/jaxiT3/Tabla.htm?t=1449			1991-2013	CCAA	Sí		Los datos de España están en http://www.ine.es/jaxiT3/Tabla.htm?t=1415	I
			169	Edad media a la maternidad	Media ponderada de las edades a la maternidad, siendo los coeficientes de ponderación las tasas específicas de fecundidad por edad	Suma de la edad de la madre -en años- de todos los nacimientos producidos en un año entre la suma de todos los nacimientos producidos en ese año.	ESCALA (número)		Indicadores demográficos básicos.Natalidad y Fecundidad. INE	http://www.ine.es/jaxiT3/Tabla.htm?t=1580			1990-2013	CCAA			Según orden de nacimiento y nacionalidad (española o extranjera)	I
			170	Flujo de inmigración procedente del extranjero	Nº de movimientos migratorios		ESCALA (números absolutos)		Estadísticas de migraciones. INE	http://www.ine.es/jaxi/tabla.do?path=/t20/p277/prov/e01/l0/&file=02001.px&type=pcaxis&L=0	Estadísticas de migraciones. INE	http://www.ine.es/jaxi/menu.do?type=pcaxis&path=/t20/p277/&file=inebase	2008-2014	CCAA	Sí	Año a año		S	Se utilizaría el ID171
			171	Saldo migratorio con el extranjero (o migración neta)	Diferencia entre las entradas por migración y las salidas por el mismo motivo (movimientos migratorios)	El signo positivo o negativo del mismo indica que las entradas superan las salidas o viceversa. Su resultado no implica una disminución o incremento de la población; si no simplemente la relación matemática entre el número de inmigrantes y emigrantes.	ESCALA (números absolutos)		Estadísticas de migraciones. INE	http://www.ine.es/jaxi/tabla.do?path=/t20/p277/prov/e01/l0/&file=02011.px&type=pcaxis&L=0	Estadísticas de migraciones. INE	http://www.ine.es/jaxi/menu.do?type=pcaxis&path=/t20/p277/&file=inebase	2008-2014	CCAA	Sí	Año a año		C	Obtener la bd del INE y hacer en R	Respuesta INE: Los datos de migraciones solo están disponibles a partir de 2008. Se trata de una carencia en los resultados publicados que subsanaremos a lo largo de 2014.
			172	Tasas bruta de Inmigración procedente del extranjero	Número total de inmigraciones procedentes del extranjero que llegan a un determinado ámbito a lo largo del año t por cada 1.000 habitantes de ese ámbito		Tanto por mil de personas	No hay desagregación por país, solo española/extranjera	Indicadores Demográficos Básicos. Movimiento migratorio. Indicadores Migración Exterior. INE	http://www.ine.es/jaxiT3/Tabla.htm?t=5846	Indicadores Demográficos Básicos. INE	http://www.ine.es/dynt3/inebase/index.htm?padre=1365	2008-2013	CCAA	Sí (año a año, no para total)	Año a año	Nacionalidad (española/no española)	C	Se puede obtener dividiendo los datos de inmigración (ID170) entre la población a mitad de periodo (ID187) y multiplicando el resultado por 1000.	Respuesta INE: Los datos de migraciones solo están disponibles a partir de 2008. No hay datos para el total de edades y sexo (sí para año a año). Se trata de una carencia en los resultados publicados que subsanaremos a lo largo de 2014.
			173	Saldo migratorio interautonómico	Diferencia entre las entradas por migración y las salidas por el mismo motivo dentro de la Comunidad Autónoma (movimientos migratorios)	El signo positivo o negativo del mismo indica que las entradas superan las salidas o viceversa. Su resultado no implica una disminución o incremento de la población; si no simplemente la relación matemática entre el número de inmigrantes y emigrantes.	ESCALA (números absolutos)		Estadísticas de migraciones. INE	http://www.ine.es/jaxi/tabla.do?path=/t20/p277/prov/e02/l0/&file=02002.px&type=pcaxis&L=0	Estadísticas de migraciones. INE	http://www.ine.es/jaxi/menu.do?type=pcaxis&path=/t20/p277/&file=inebase	2008-2014	CCAA	Sí	Año a año		C	Obtener la bd del INE y hacer en R	Respuesta INE: Los datos de migraciones solo están disponibles a partir de 2008. Se trata de una carencia en los resultados publicados que subsanaremos a lo largo de 2014.
			188	Tasa de Migración Neta con el Extranjero	Migración anual neta por cada 1.000 habitantes residentes en un determinado ámbito geográfico		Tanto por mil de personas		Estadísticas de migraciones. INE		Estadísticas de migraciones. INE	http://www.ine.es/jaxi/menu.do?type=pcaxis&path=/t20/p277/&file=inebase	2008-2014	CCAA	Sí (año a año, no para total)	Año a año		C	Se puede obtener dividiendo los datos de inmigración (ID171) entre la población a mitad de periodo (ID187) y multiplicando el resultado por 1000.	Respuesta INE: Los datos de migraciones solo están disponibles a partir de 2008. No hay datos para el total de edades y sexo (sí para año a año). Se trata de una carencia en los resultados publicados que subsanaremos a lo largo de 2014.
			189	Tasa de Migración Interautonómica Neta	Saldo migratorio neto de la comunidad autónoma lo largo del año t por cada 1.000 habitantes pertenecientes a dicho ámbito		Tanto por mil de personas		Estadísticas de migraciones. INE		Estadísticas de migraciones. INE	http://www.ine.es/jaxi/menu.do?type=pcaxis&path=/t20/p277/&file=inebase	2008-2014	CCAA	Sí (año a año, no para total)	Año a año		C	Se puede obtener dividiendo los datos de inmigración (ID173) entre la población a mitad de periodo (ID187) y multiplicando el resultado por 1000.	Respuesta INE: Los datos de migraciones solo están disponibles a partir de 2008. No hay datos para el total de edades y sexo (sí para año a año). Se trata de una carencia en los resultados publicados que subsanaremos a lo largo de 2014.
	PROPIA		174	Tasa de dependencia demográfica en >65 años			Porcentaje	Tb llamada tasa de dependencia económica	Indicadores demográficos básicos.Crecimiento y Estructura de la población. INE	http://www.ine.es/jaxiT3/Tabla.htm?t=1455			1975-2014	CCAA				I
	PROPIA		175	Tasa de dependencia demográfica en <16 años			Porcentaje	Tb llamada tasa de dependencia económica	Indicadores demográficos básicos.Crecimiento y Estructura de la población. INE	http://www.ine.es/jaxiT3/Tabla.htm?t=1454			1975-2014	CCAA				I
	PROPIA		176	Índice de envejecimiento			Porcentaje		Indicadores demográficos básicos.Crecimiento y Estructura de la población. INE	http://www.ine.es/jaxiT3/Tabla.htm?t=1454			1975-2014	CCAA				I

## Sheet: Códigos
CCAA
